# Supplementary material for: Trends in socioeconomic inequalities in mortality in small areas of 33 Spanish cities
Source: Springer Nature journal article supplement (doi:10.1186/s12889-016-3190-y), 2016-07-29

# **Atlas of mortality in 33 Spanish cities (periods 1996-1998 and 2005-2007)**

**Figure 1.** Distribution of deprivation index (a) and of the smoothed Standardised Mortality Ratios (sSMR) (b-e) for all-cause mortality, by period (1996-1998 and 2005-2007) and by sex in the city of Alicante. Green areas represent less socioeconomic deprivation and lower sSMR values. Brown areas represent greater socioeconomic deprivation and higher sSMR values.

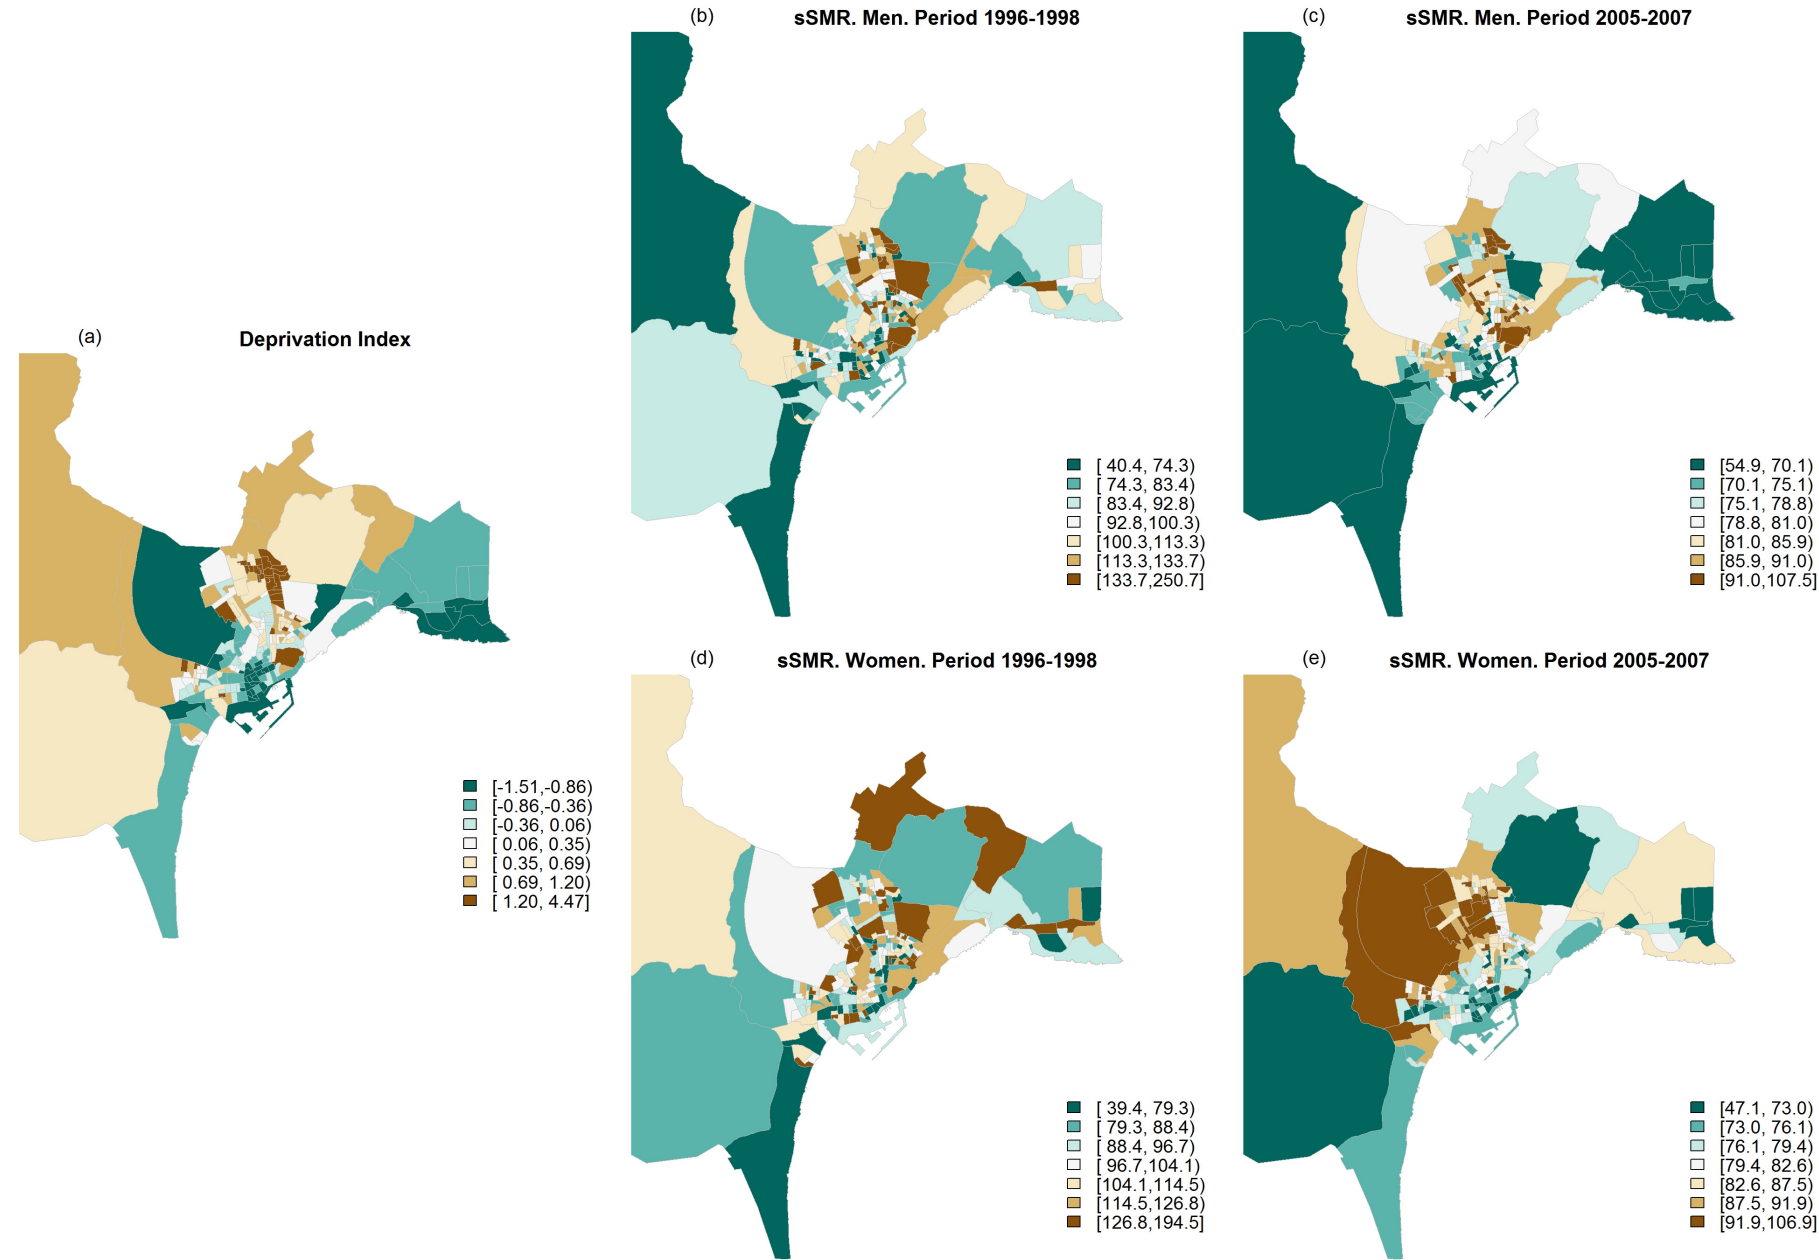



**Figure 2.** Distribution of deprivation index (a) and of the smoothed Standardised Mortality Ratios (sSMR) (b-e) for all-cause mortality, by period (1996-1998 and 2005-2007) and by sex in the city of Almería. Green areas represent less socioeconomic deprivation and lower sSMR values. Brown areas represent greater socioeconomic deprivation and higher sSMR values.

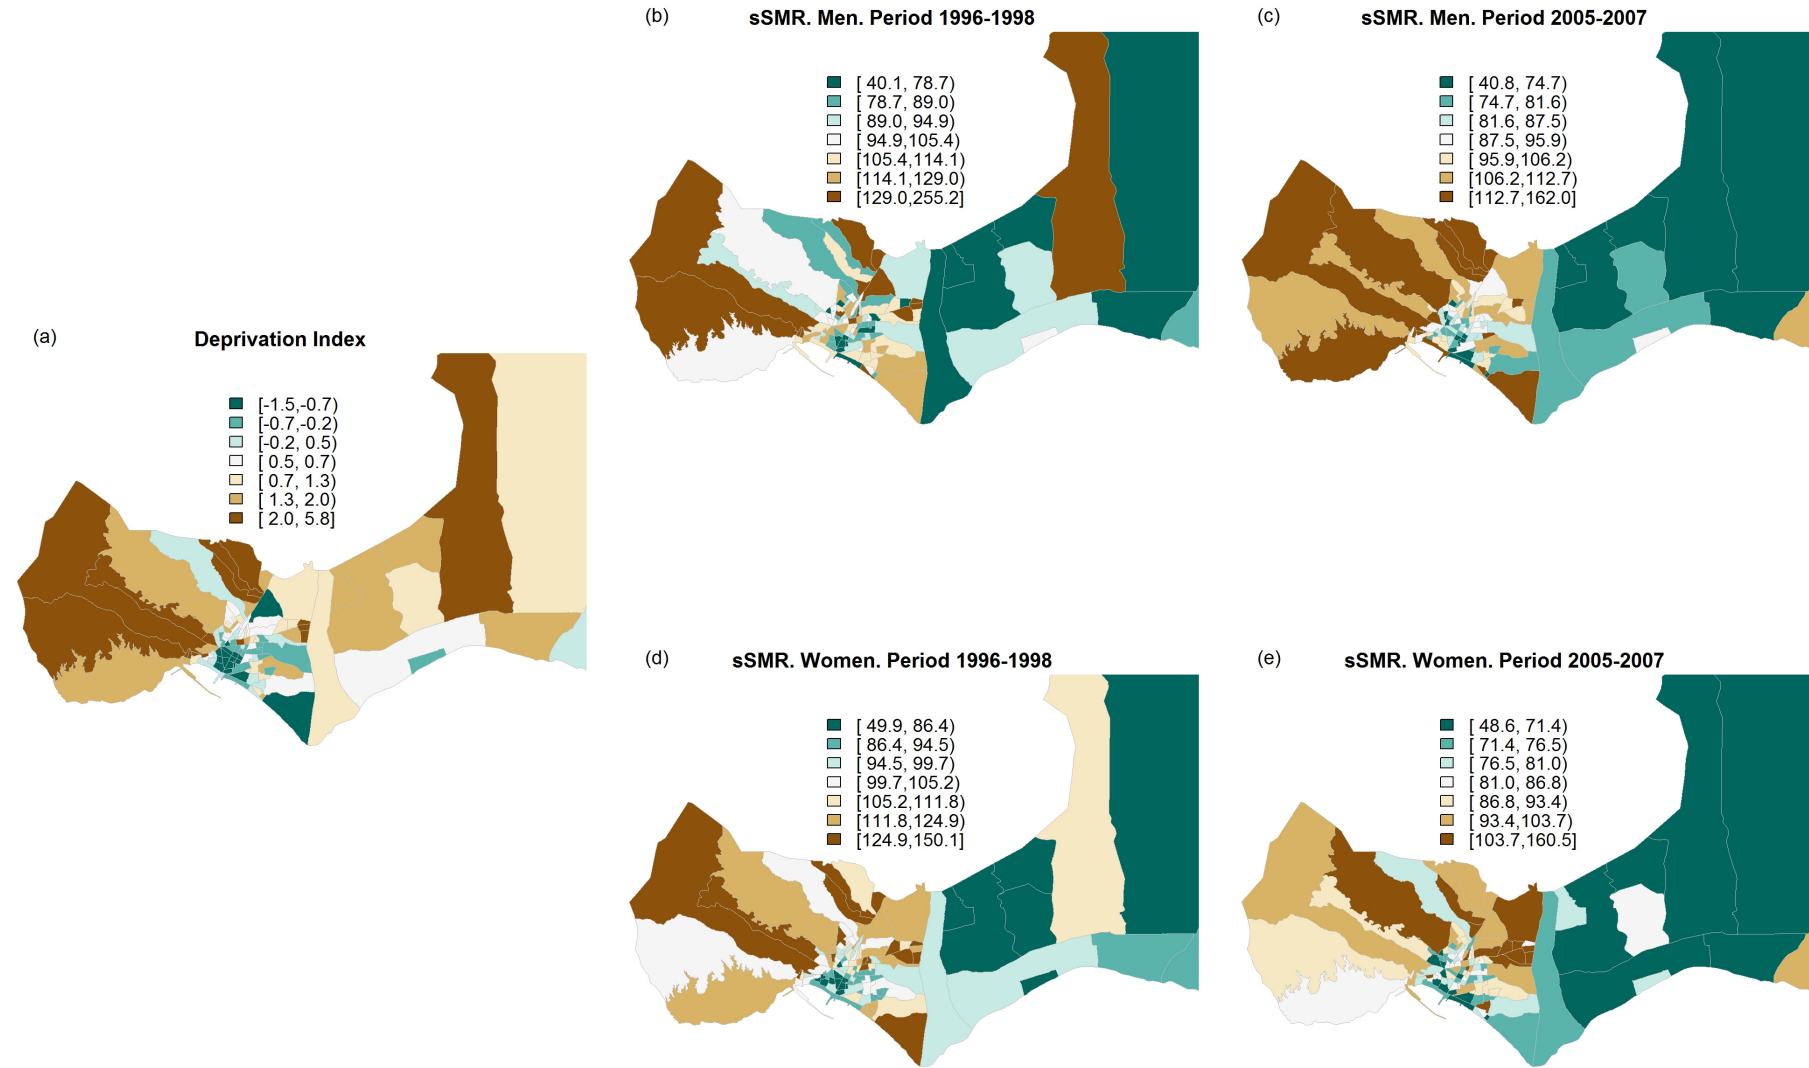

**Figure 3.** Distribution of deprivation index (a) and of the smoothed Standardised Mortality Ratios (sSMR) (b-e) for all-cause mortality, by period (1996-1998 and 2005-2007) and by sex in the city of Avilés. Green areas represent less socioeconomic deprivation and lower sSMR values. Brown areas represent greater socioeconomic deprivation and higher sSMR values.

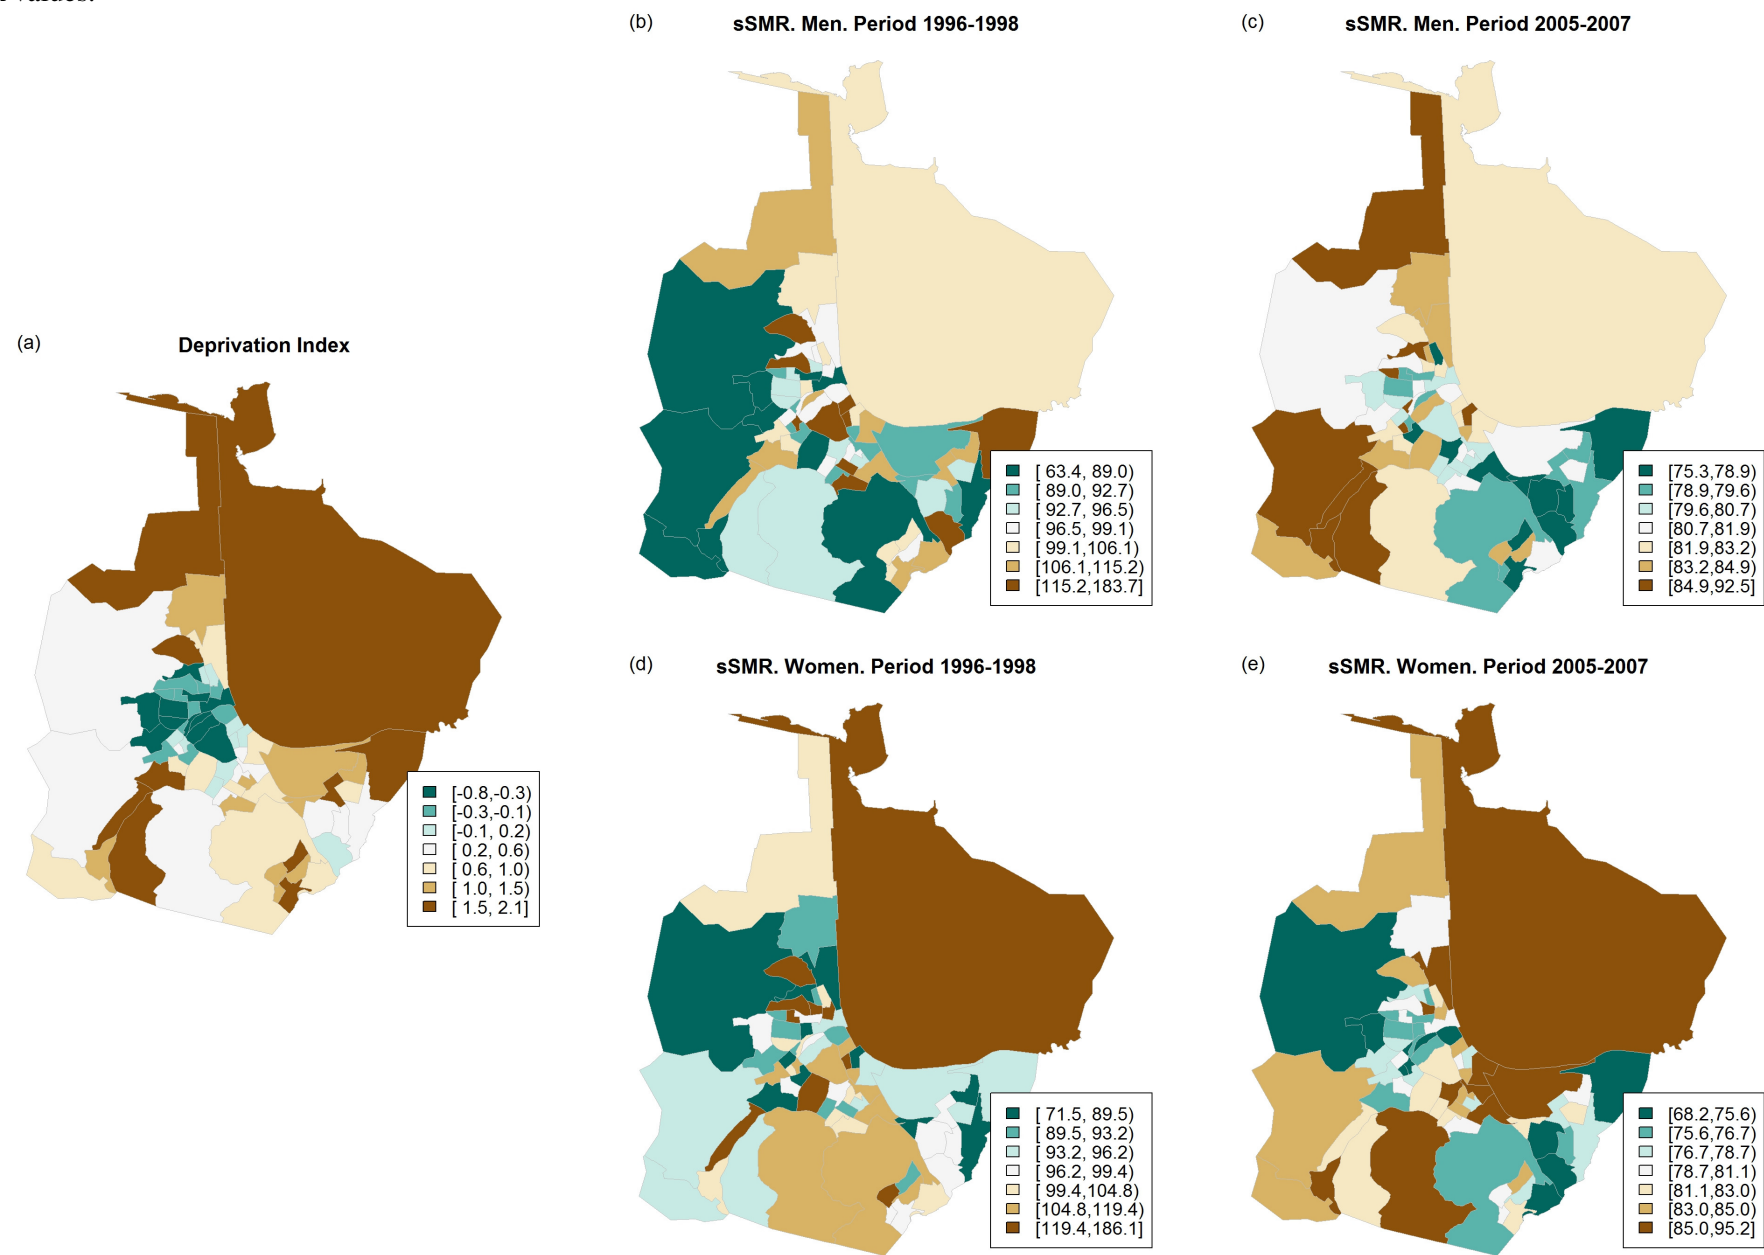

**Figure 4.** Distribution of deprivation index (a) and of the smoothed Standardised Mortality Ratios (sSMR) (b-e) for all-cause mortality, by period (1996-1998 and 2005-2007) and by sex in the city of Barcelona. Green areas represent less socioeconomic deprivation and lower sSMR values. Brown areas represent greater socioeconomic deprivation and higher sSMR values.

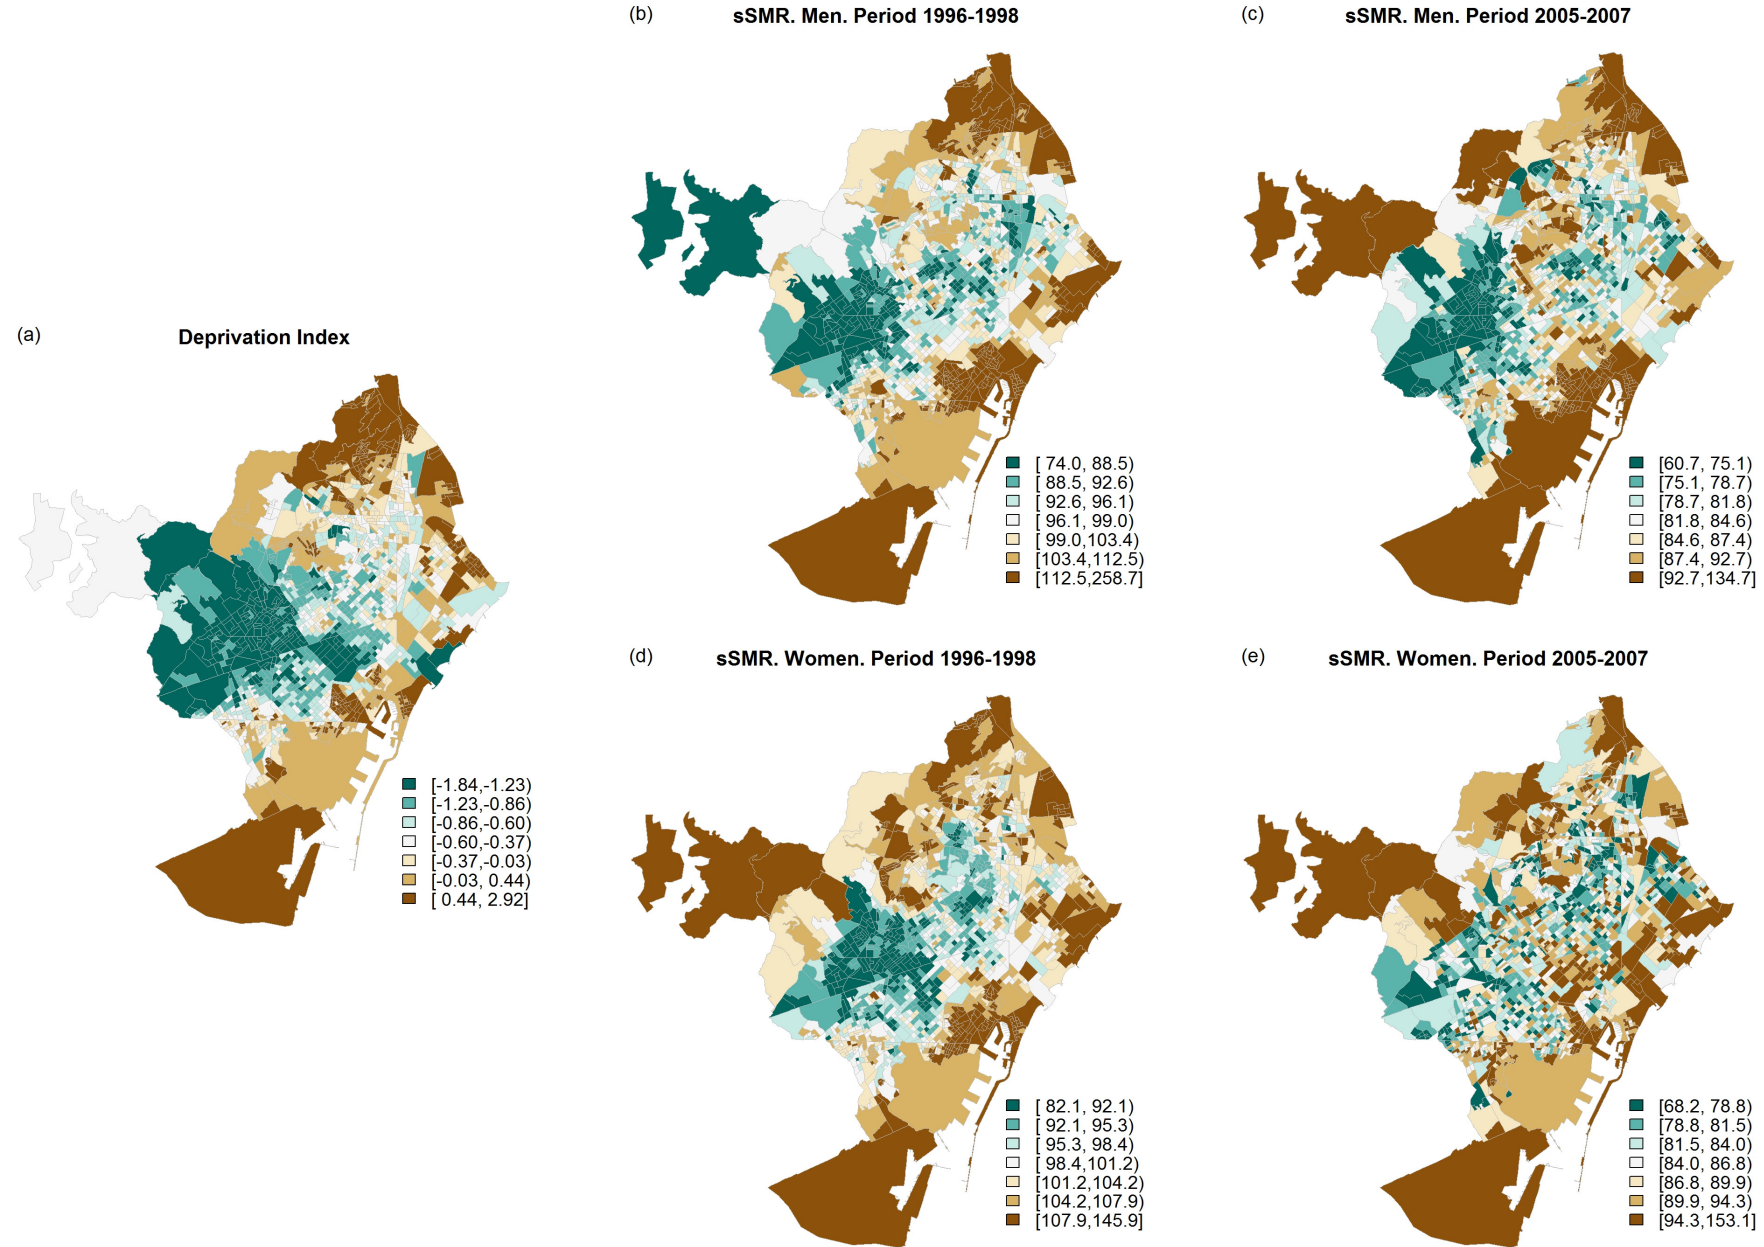

**Figure 5.** Distribution of deprivation index (a) and of the smoothed Standardised Mortality Ratios (sSMR) (b-e) for all-cause mortality, by period (1996-1998 and 2005-2007) and by sex in the city of Bilbao. Green areas represent less socioeconomic deprivation and lower sSMR values. Brown areas represent greater socioeconomic deprivation and higher sSMR values.

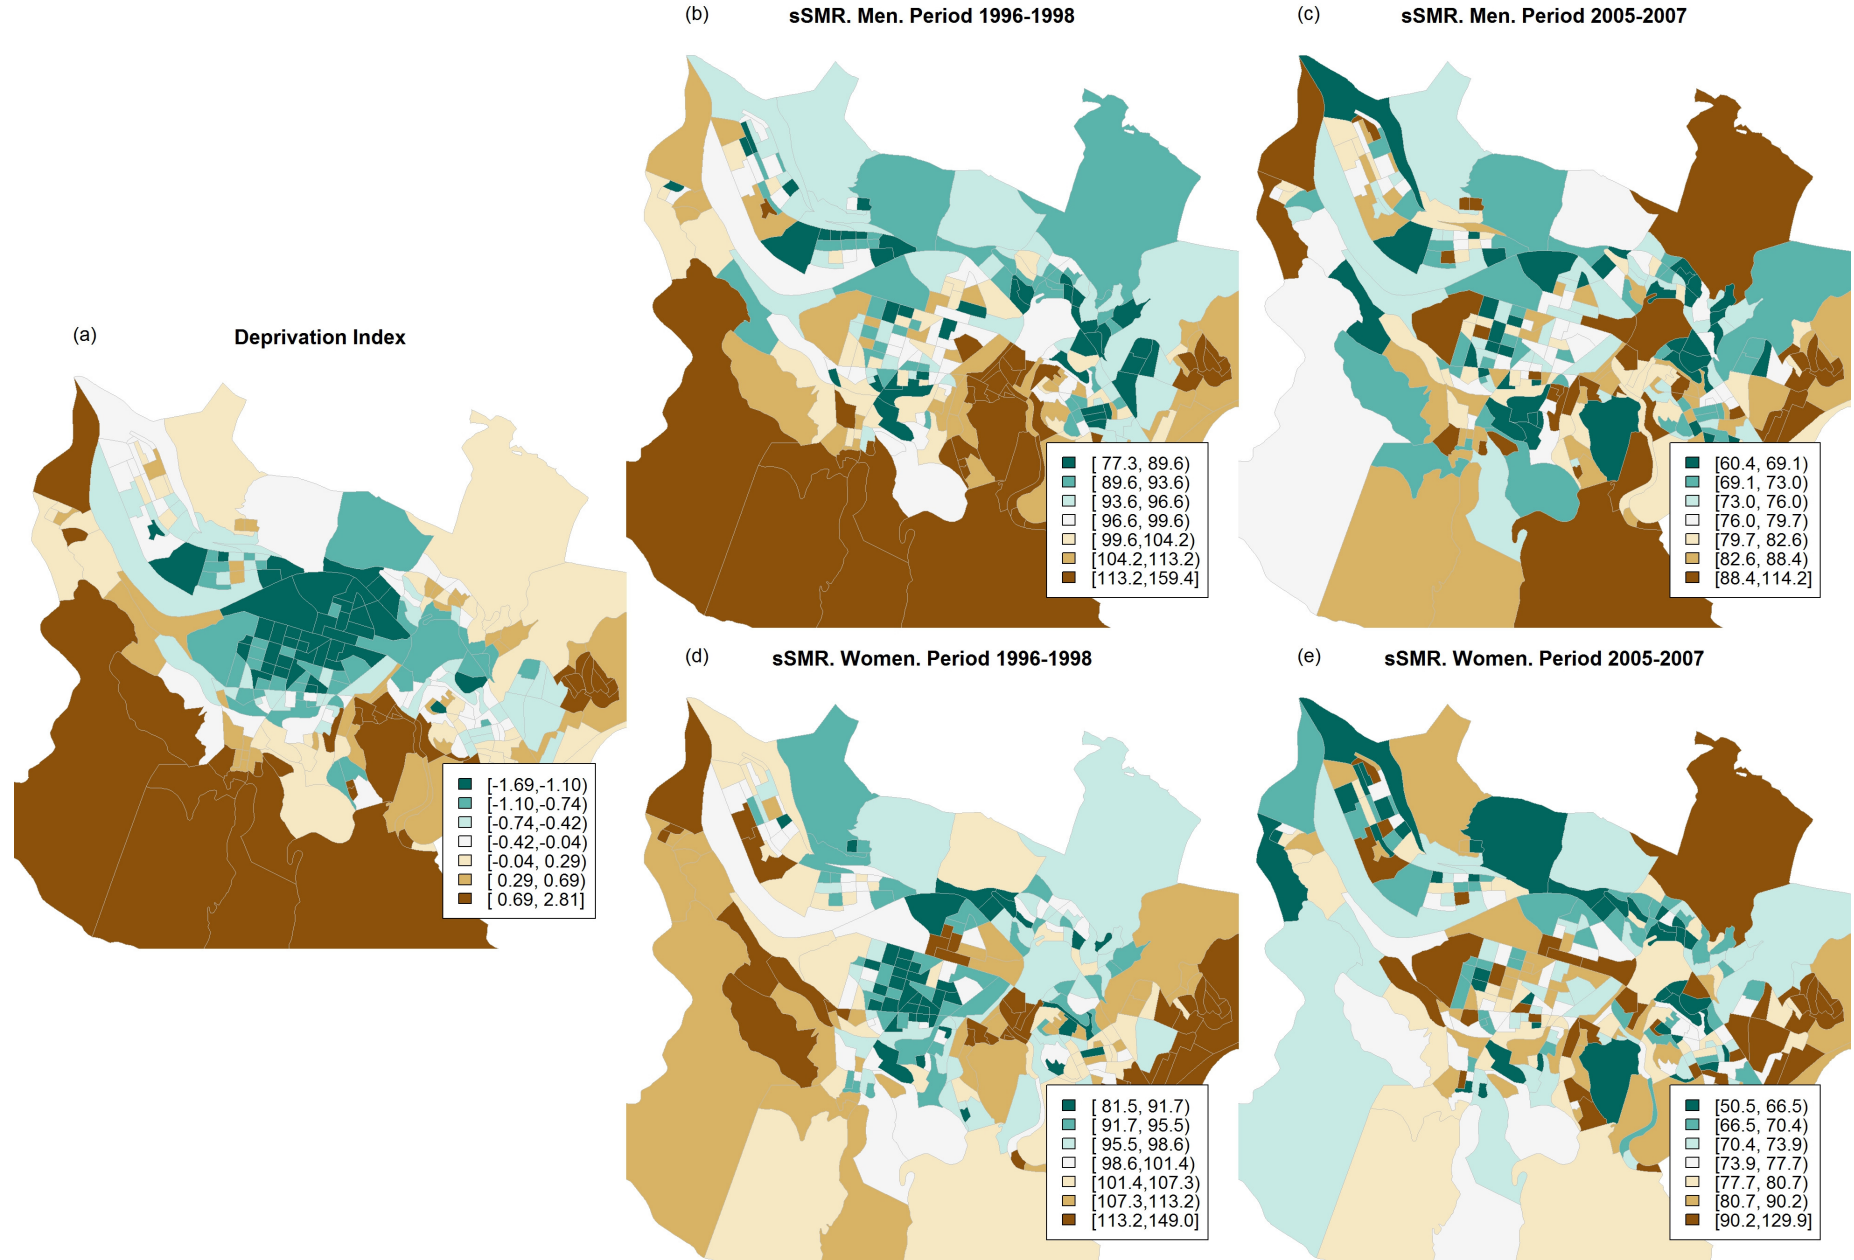



**Figure 6.** Distribution of deprivation index (a) and of the smoothed Standardised Mortality Ratios (sSMR) (b-e) for all-cause mortality, by period (1996-1998 and 2005-2007) and by sex in the city of Cádiz. Green areas represent less socioeconomic deprivation and lower sSMR values. Brown areas represent greater socioeconomic deprivation and higher sSMR values.

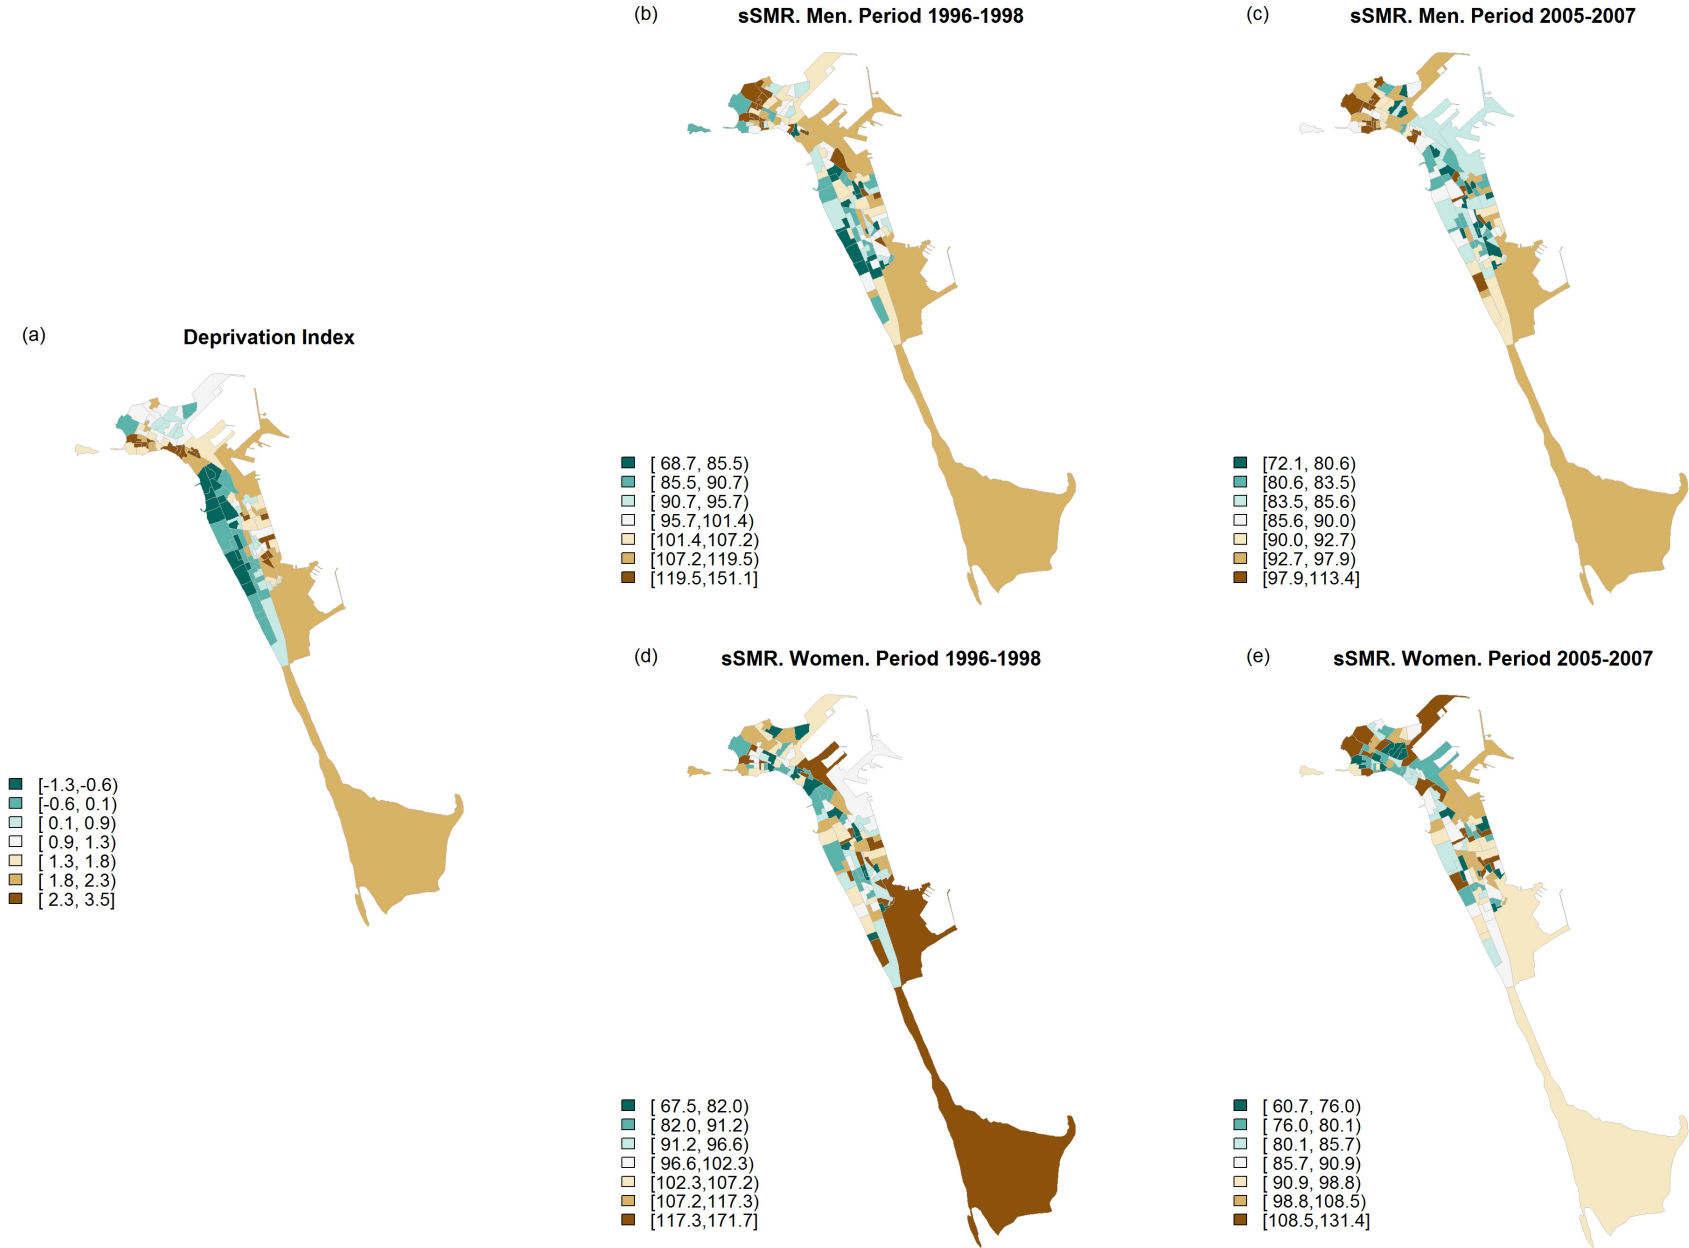

**Figure 7.** Distribution of deprivation index (a) and of the smoothed Standardised Mortality Ratios (sSMR) (b-e) for all-cause mortality, by period (1996-1998 and 2005-2007) and by sex in the city of Cartagena-La Unión. Green areas represent less socioeconomic deprivation and lower sSMR values. Brown areas represent greater socioeconomic deprivation and higher sSMR values.

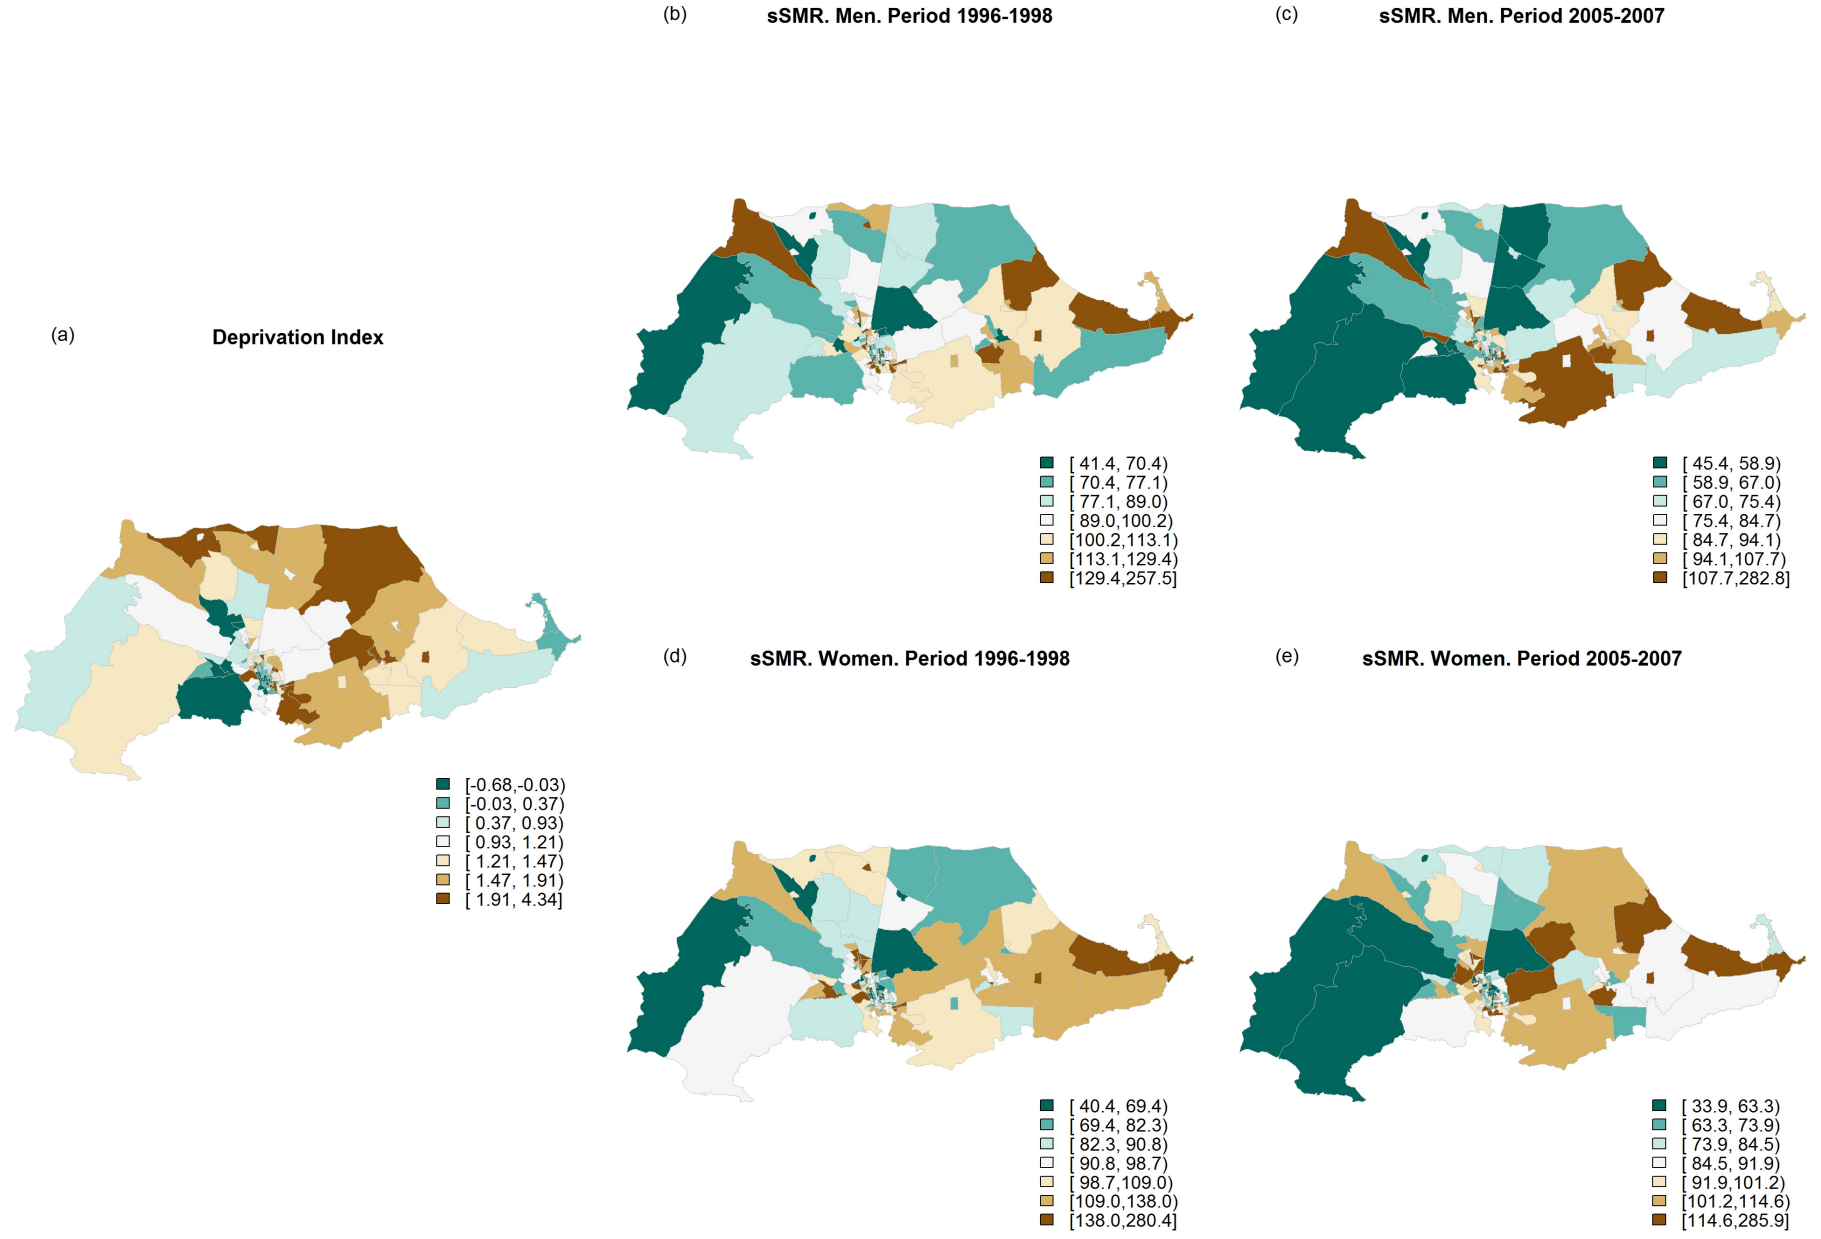

**Figure 8.** Distribution of deprivation index (a) and of the smoothed Standardised Mortality Ratios (sSMR) (b-e) for all-cause mortality, by period (1996-1998 and 2005-2007) and by sex in the city of Castellón. Green areas represent less socioeconomic deprivation and lower sSMR values. Brown areas represent greater socioeconomic deprivation and higher sSMR values.

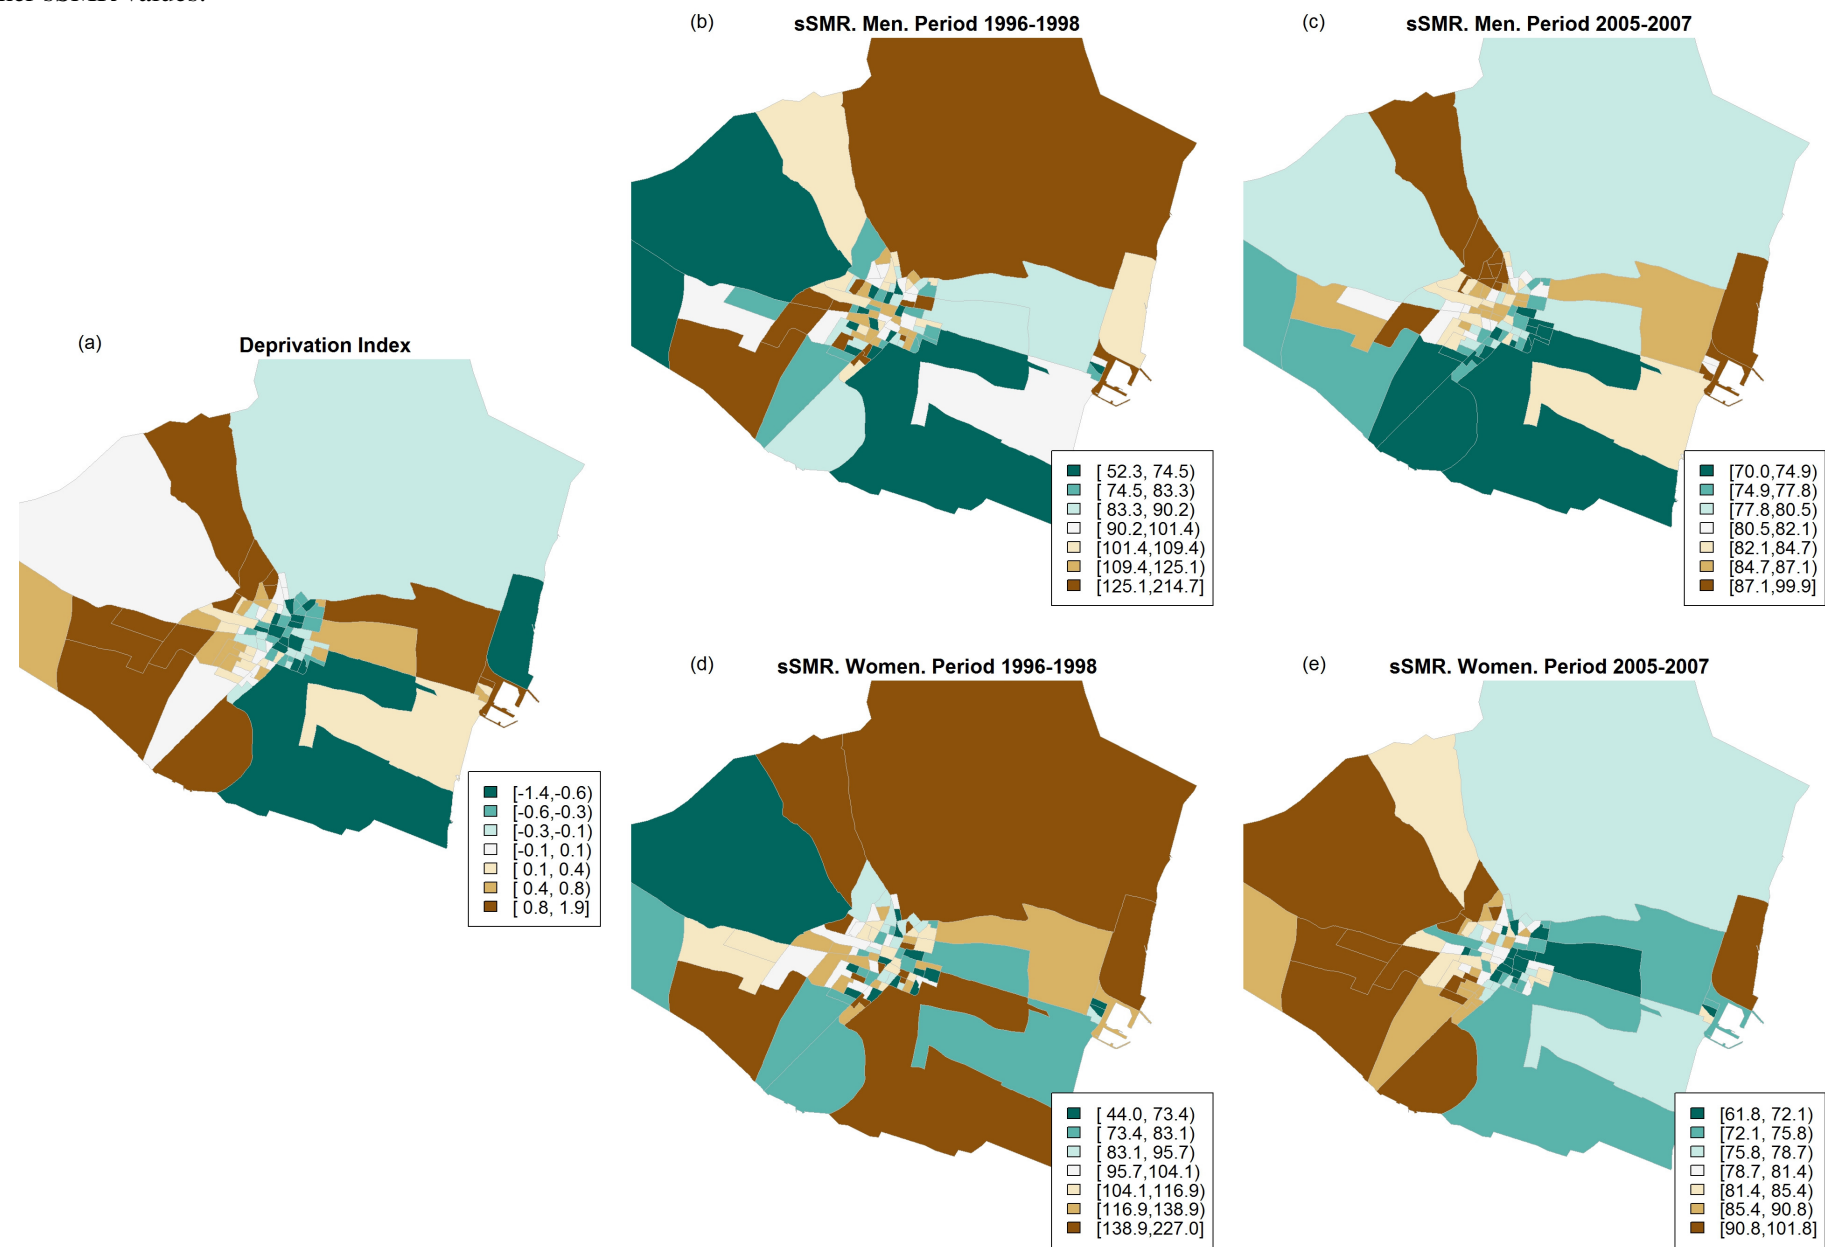

**Figure 9.** Distribution of deprivation index (a) and of the smoothed Standardised Mortality Ratios (sSMR) (b-e) for all-cause mortality, by period (1996-1998 and 2005-2007) and by sex in the city of Córdoba. Green areas represent less socioeconomic deprivation and lower sSMR values. Brown areas represent greater socioeconomic deprivation and higher sSMR values.

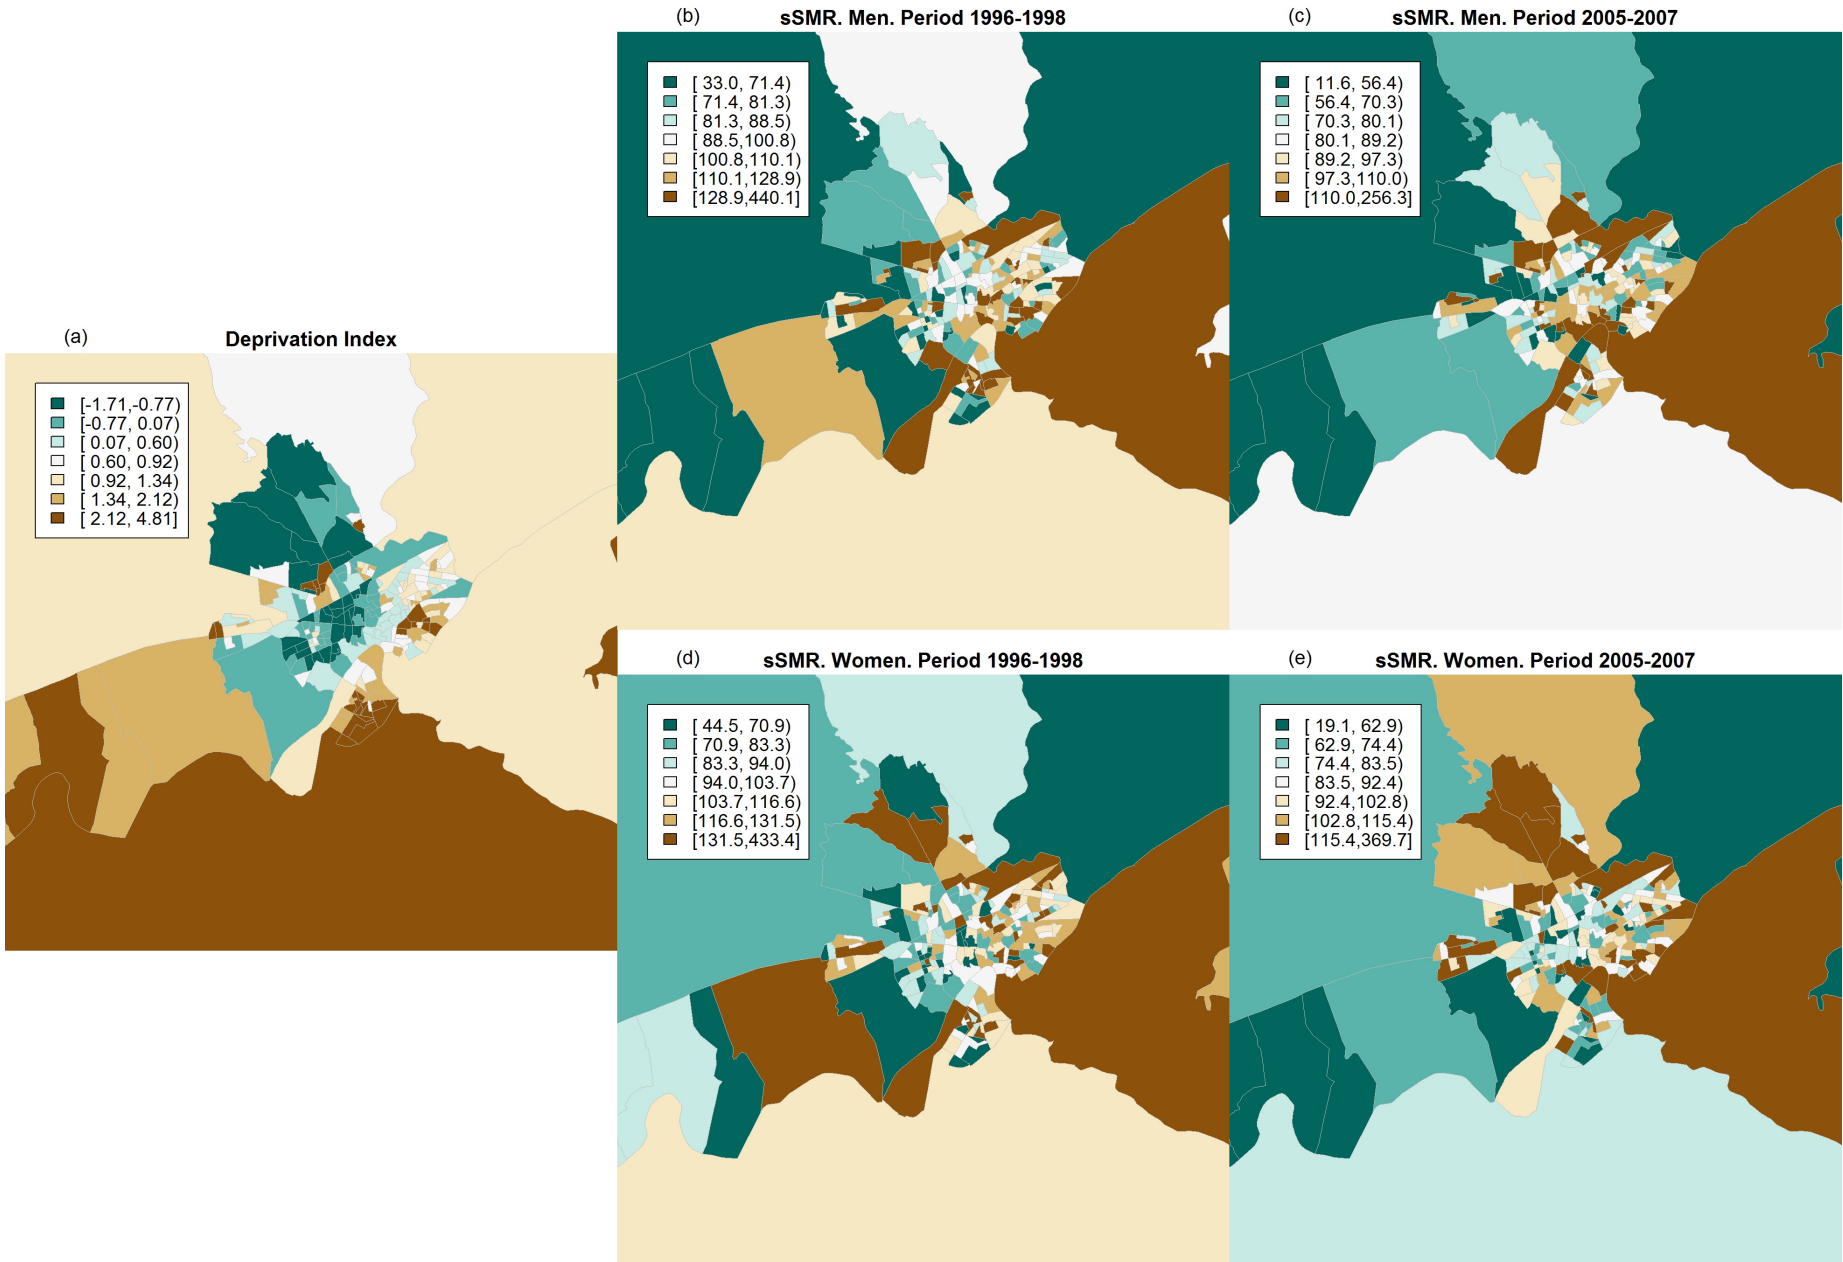



**Figure 10.** Distribution of deprivation index (a) and of the smoothed Standardised Mortality Ratios (sSMR) (b-e) for all-cause mortality, by period (1996-1998 and 2005-2007) and by sex in the city of Coruña. Green areas represent less socioeconomic deprivation and lower sSMR values. Brown areas represent greater socioeconomic deprivation and higher sSMR values.

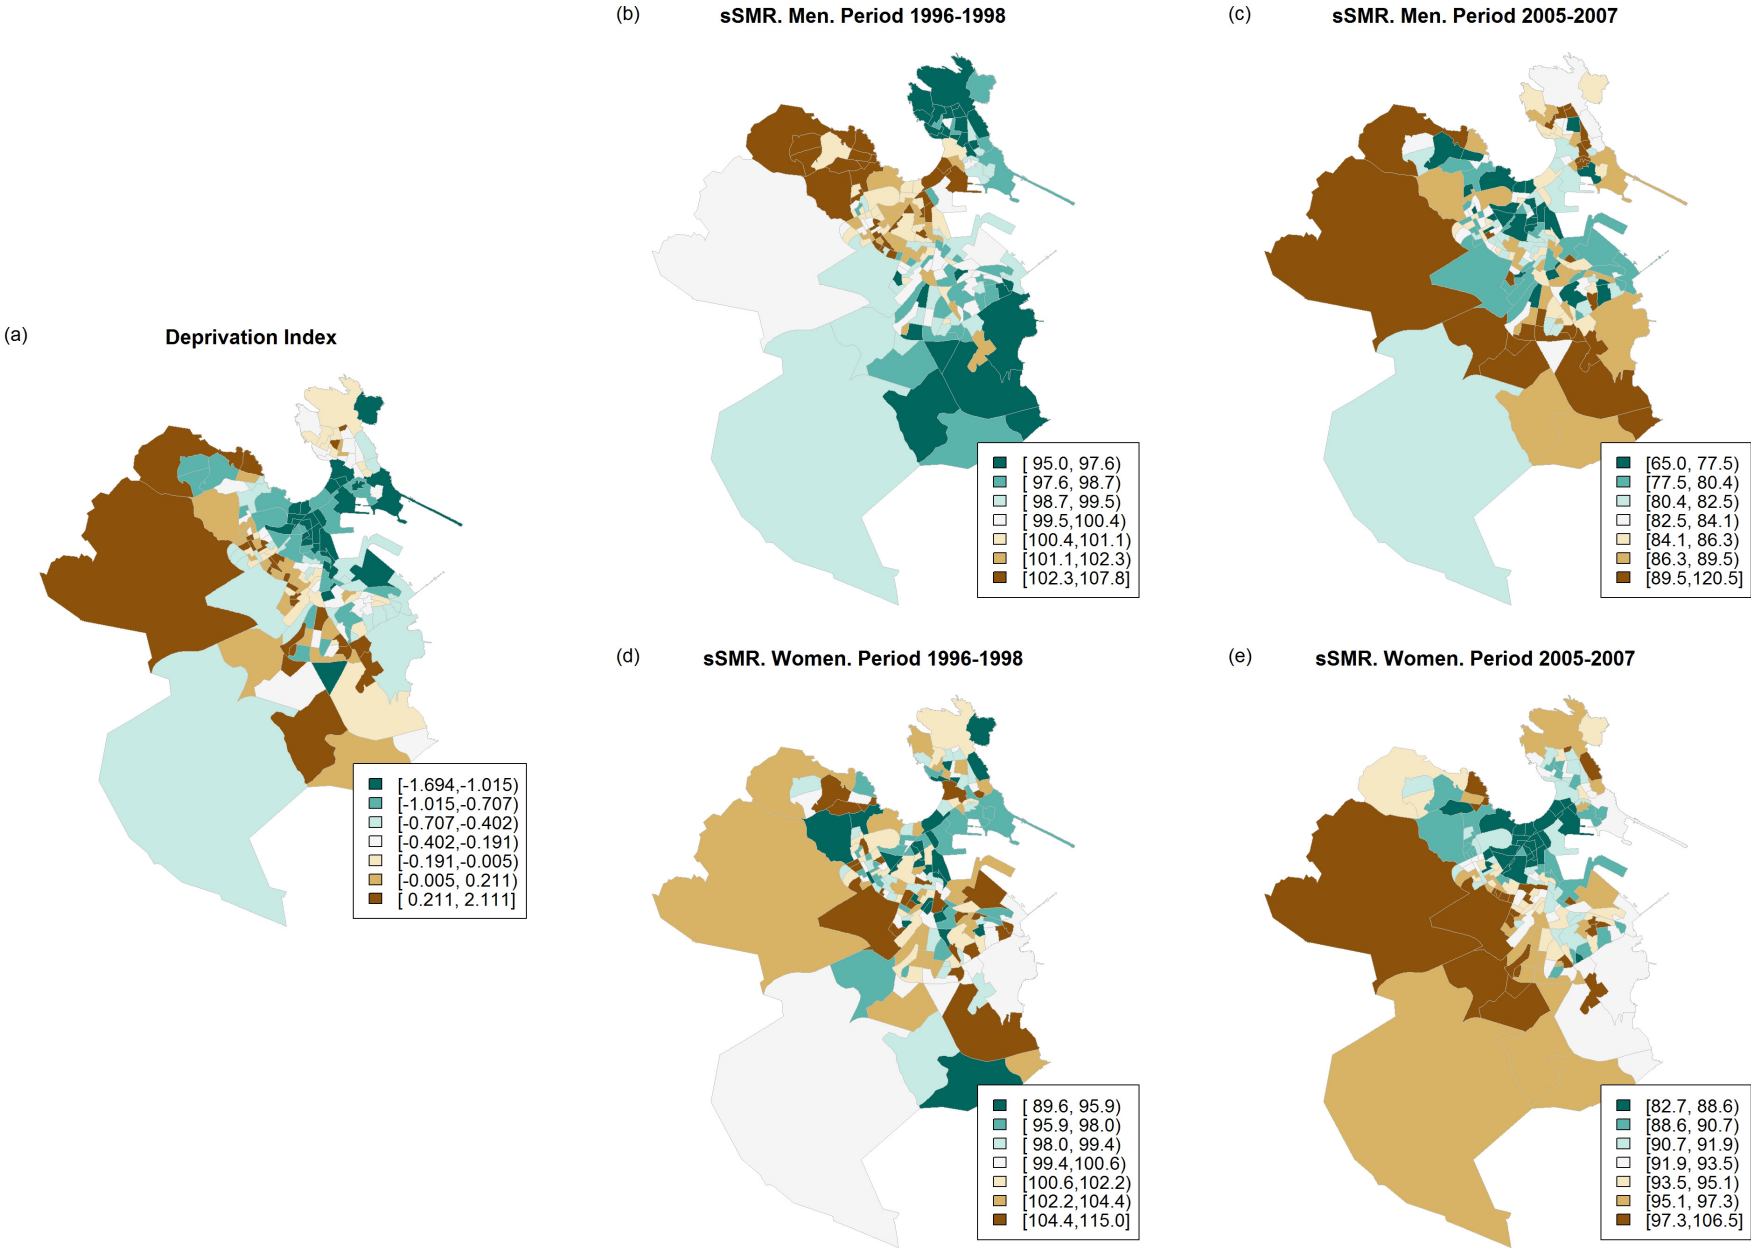

**Figure 11.** Distribution of deprivation index (a) and of the smoothed Standardised Mortality Ratios (sSMR) (b-e) for all-cause mortality, by period (1996-1998 and 2005-2007) and by sex in the city of Ferrol. Green areas represent less socioeconomic deprivation and lower sSMR values. Brown areas represent greater socioeconomic deprivation and higher sSMR values.

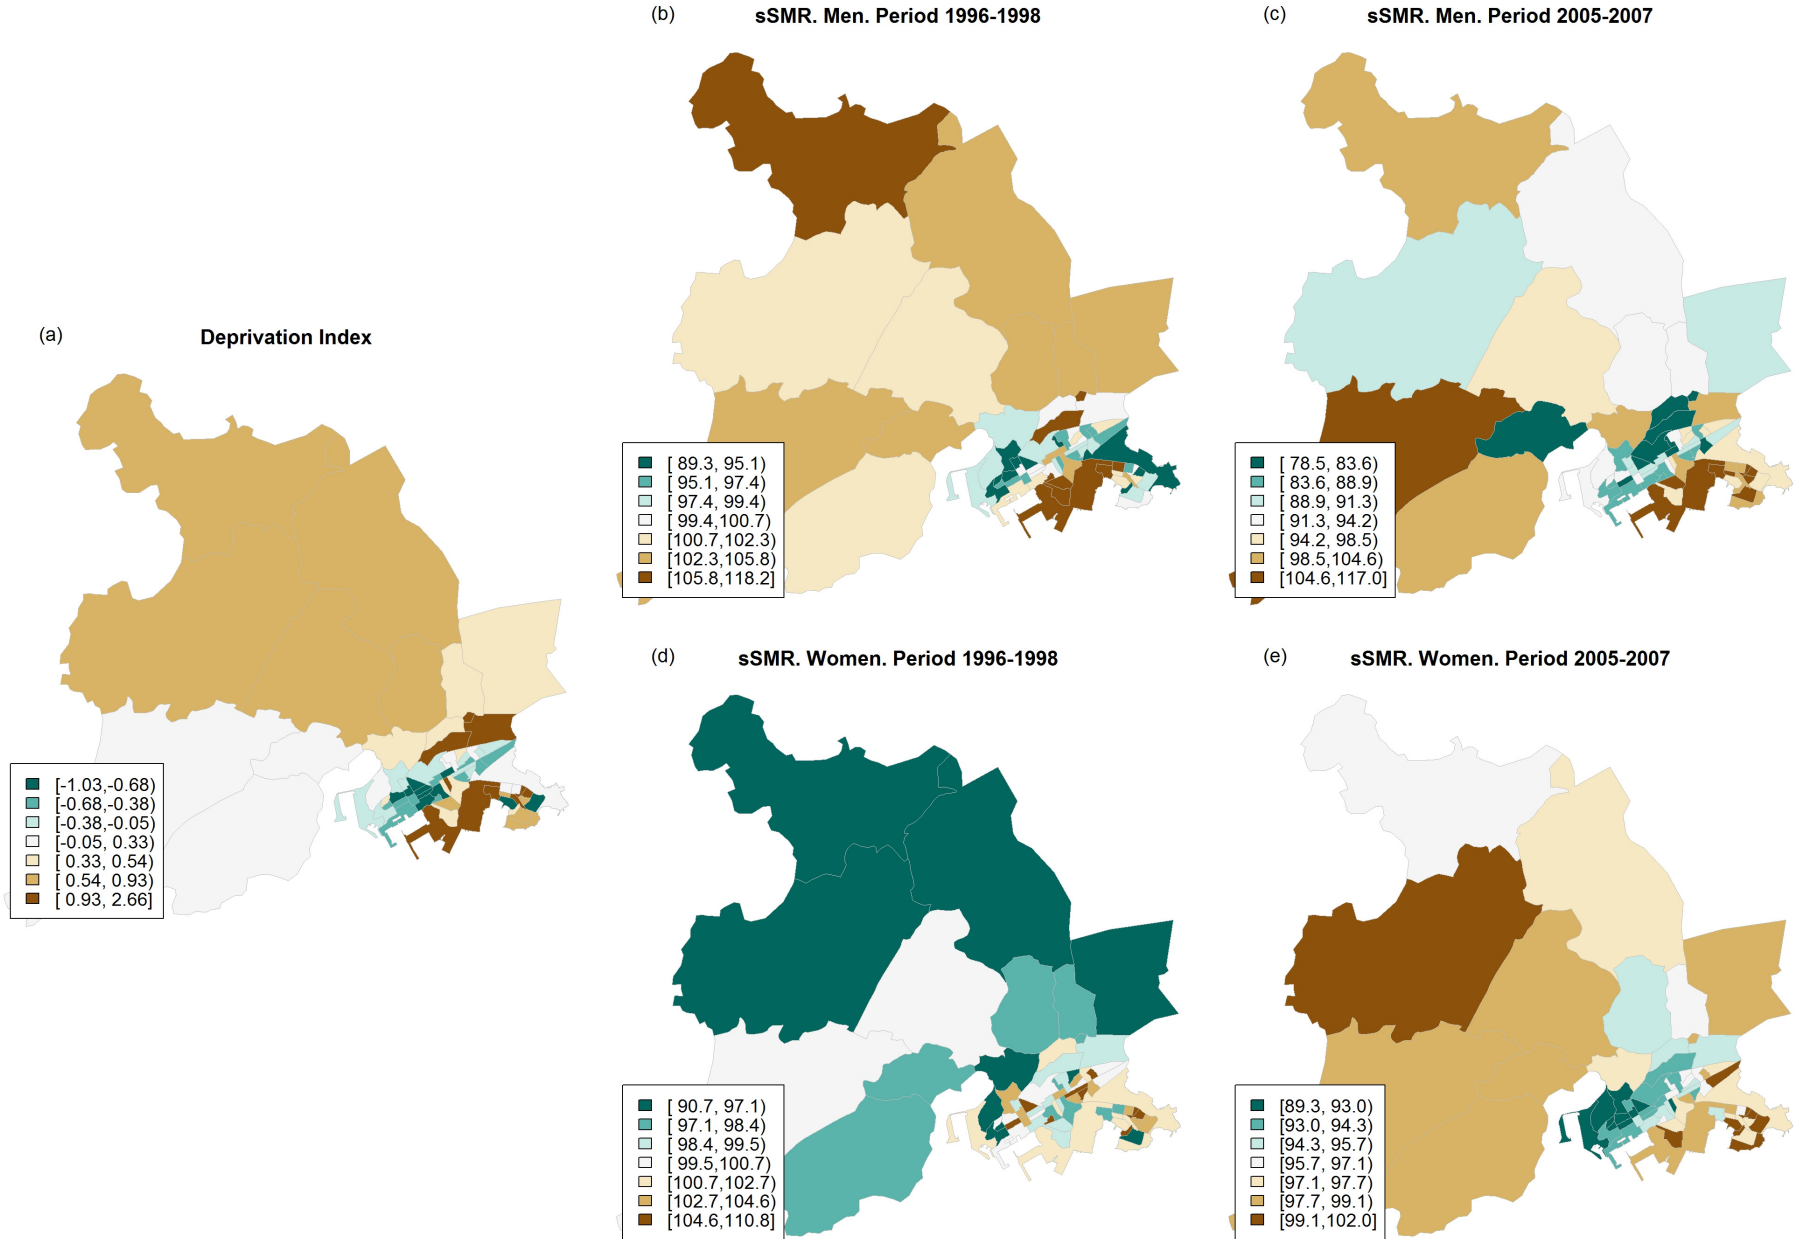

**Figure 12.** Distribution of deprivation index (a) and of the smoothed Standardised Mortality Ratios (sSMR) (b-e) for all-cause mortality, by period (1996-1998 and 2005-2007) and by sex in the city of Gijón. Green areas represent less socioeconomic deprivation and lower sSMR values. Brown areas represent greater socioeconomic deprivation and higher sSMR values.

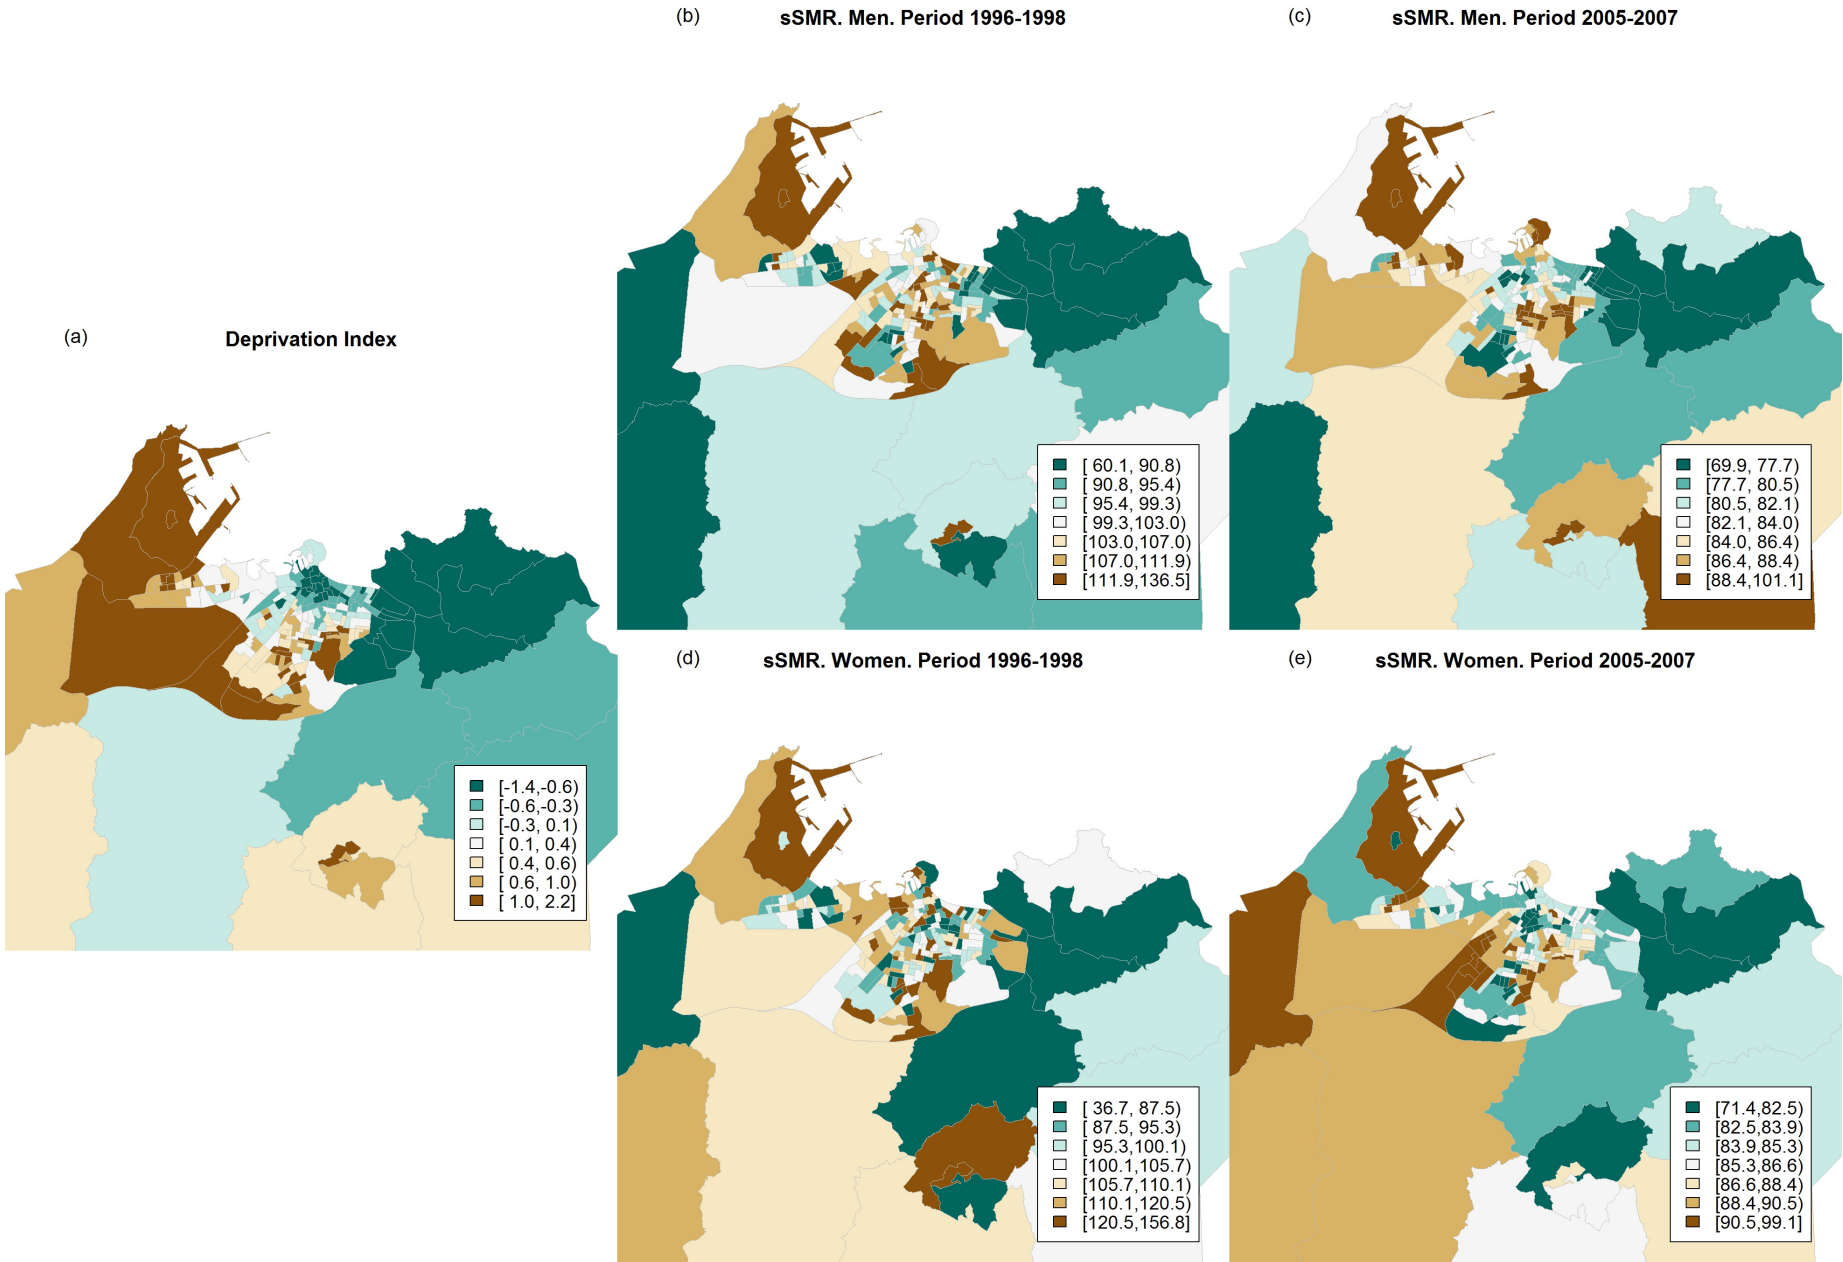

**Figure 13.** Distribution of deprivation index (a) and of the smoothed Standardised Mortality Ratios (sSMR) (b-e) for all-cause mortality, by period (1996-1998 and 2005-2007) and by sex in the city of Granada. Green areas represent less socioeconomic deprivation and lower sSMR values. Brown areas represent greater socioeconomic deprivation and higher sSMR values.

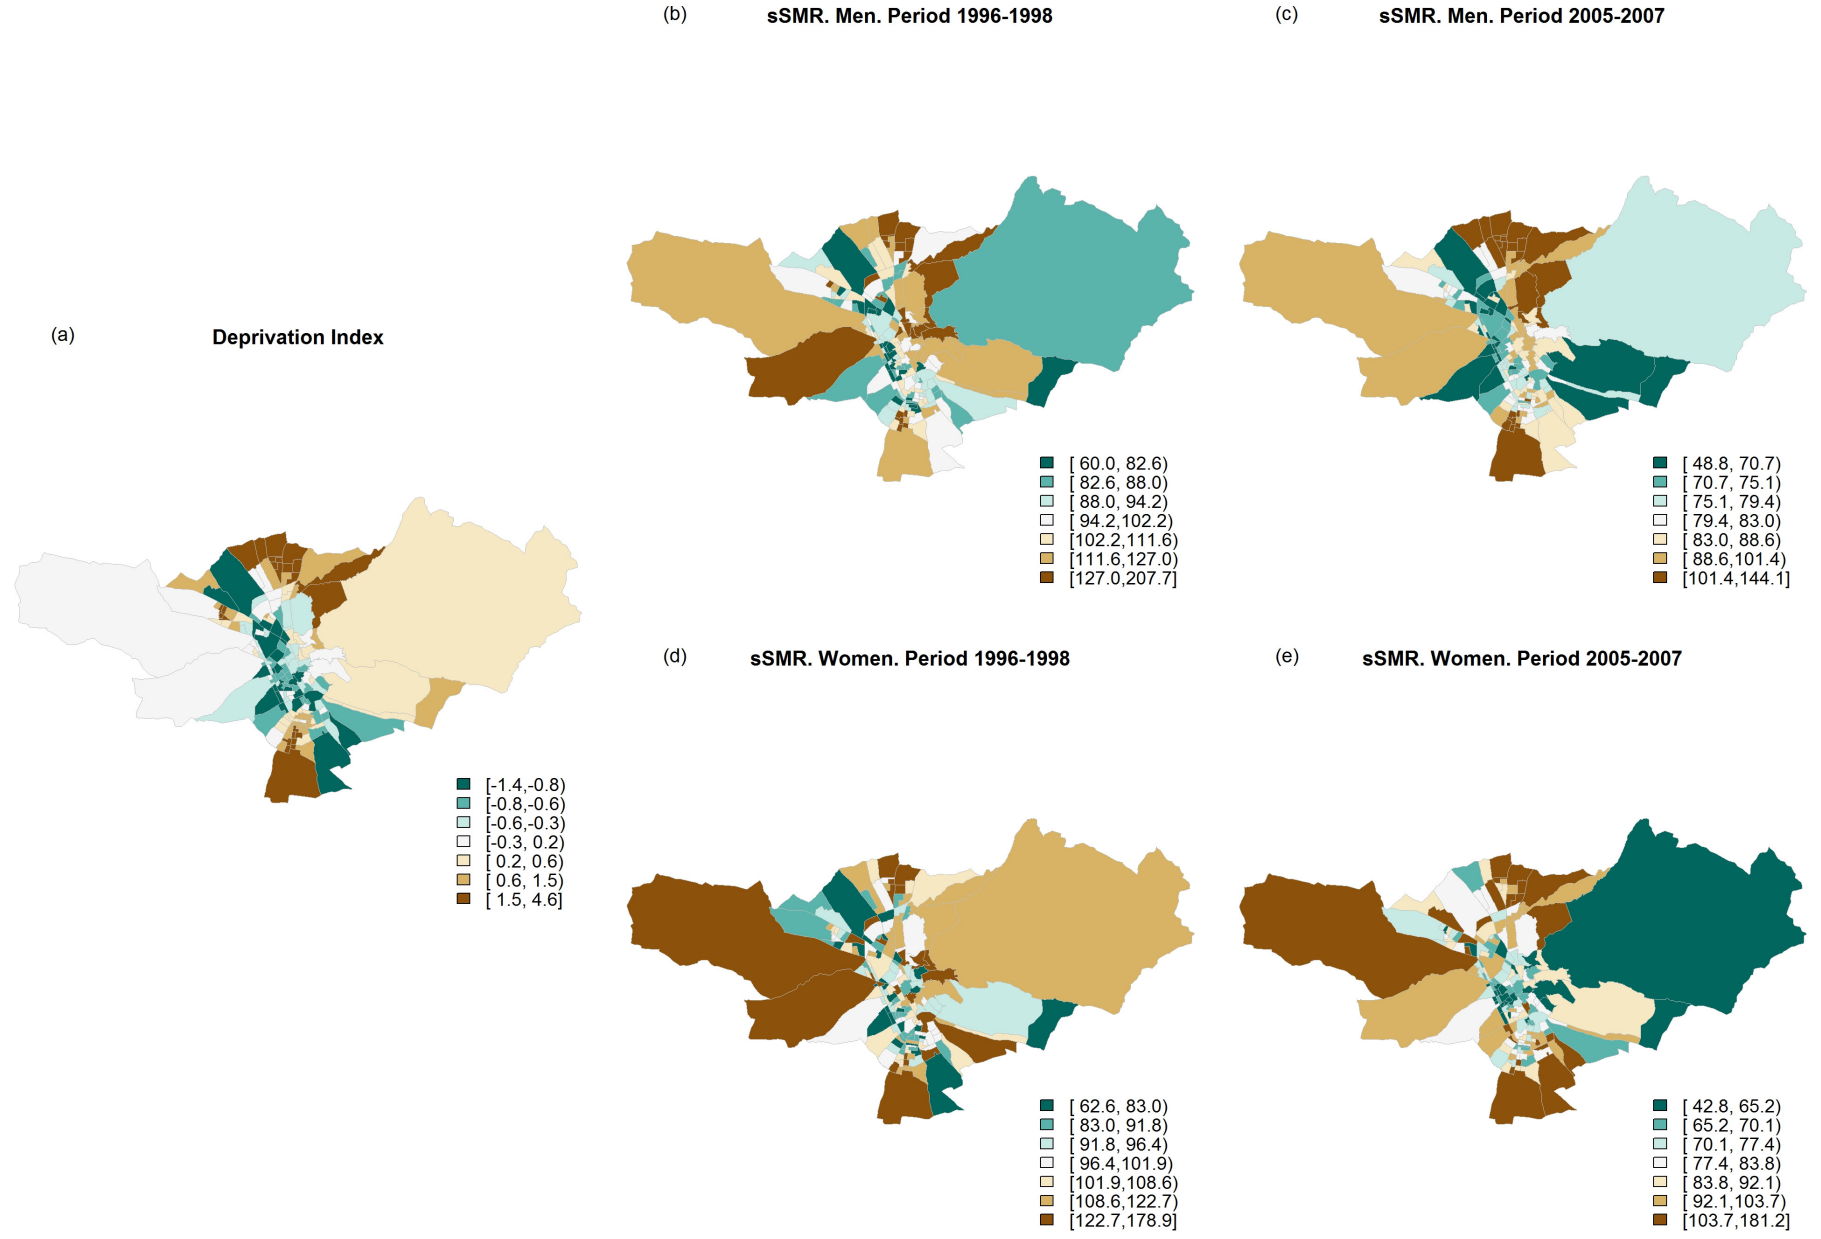

**Figure 14.** Distribution of deprivation index (a) and of the smoothed Standardised Mortality Ratios (sSMR) (b-e) for all-cause mortality, by period (1996-1998 and 2005-2007) and by sex in the city of Huelva. Green areas represent less socioeconomic deprivation and lower sSMR values. Brown areas represent greater socioeconomic deprivation and higher sSMR values.

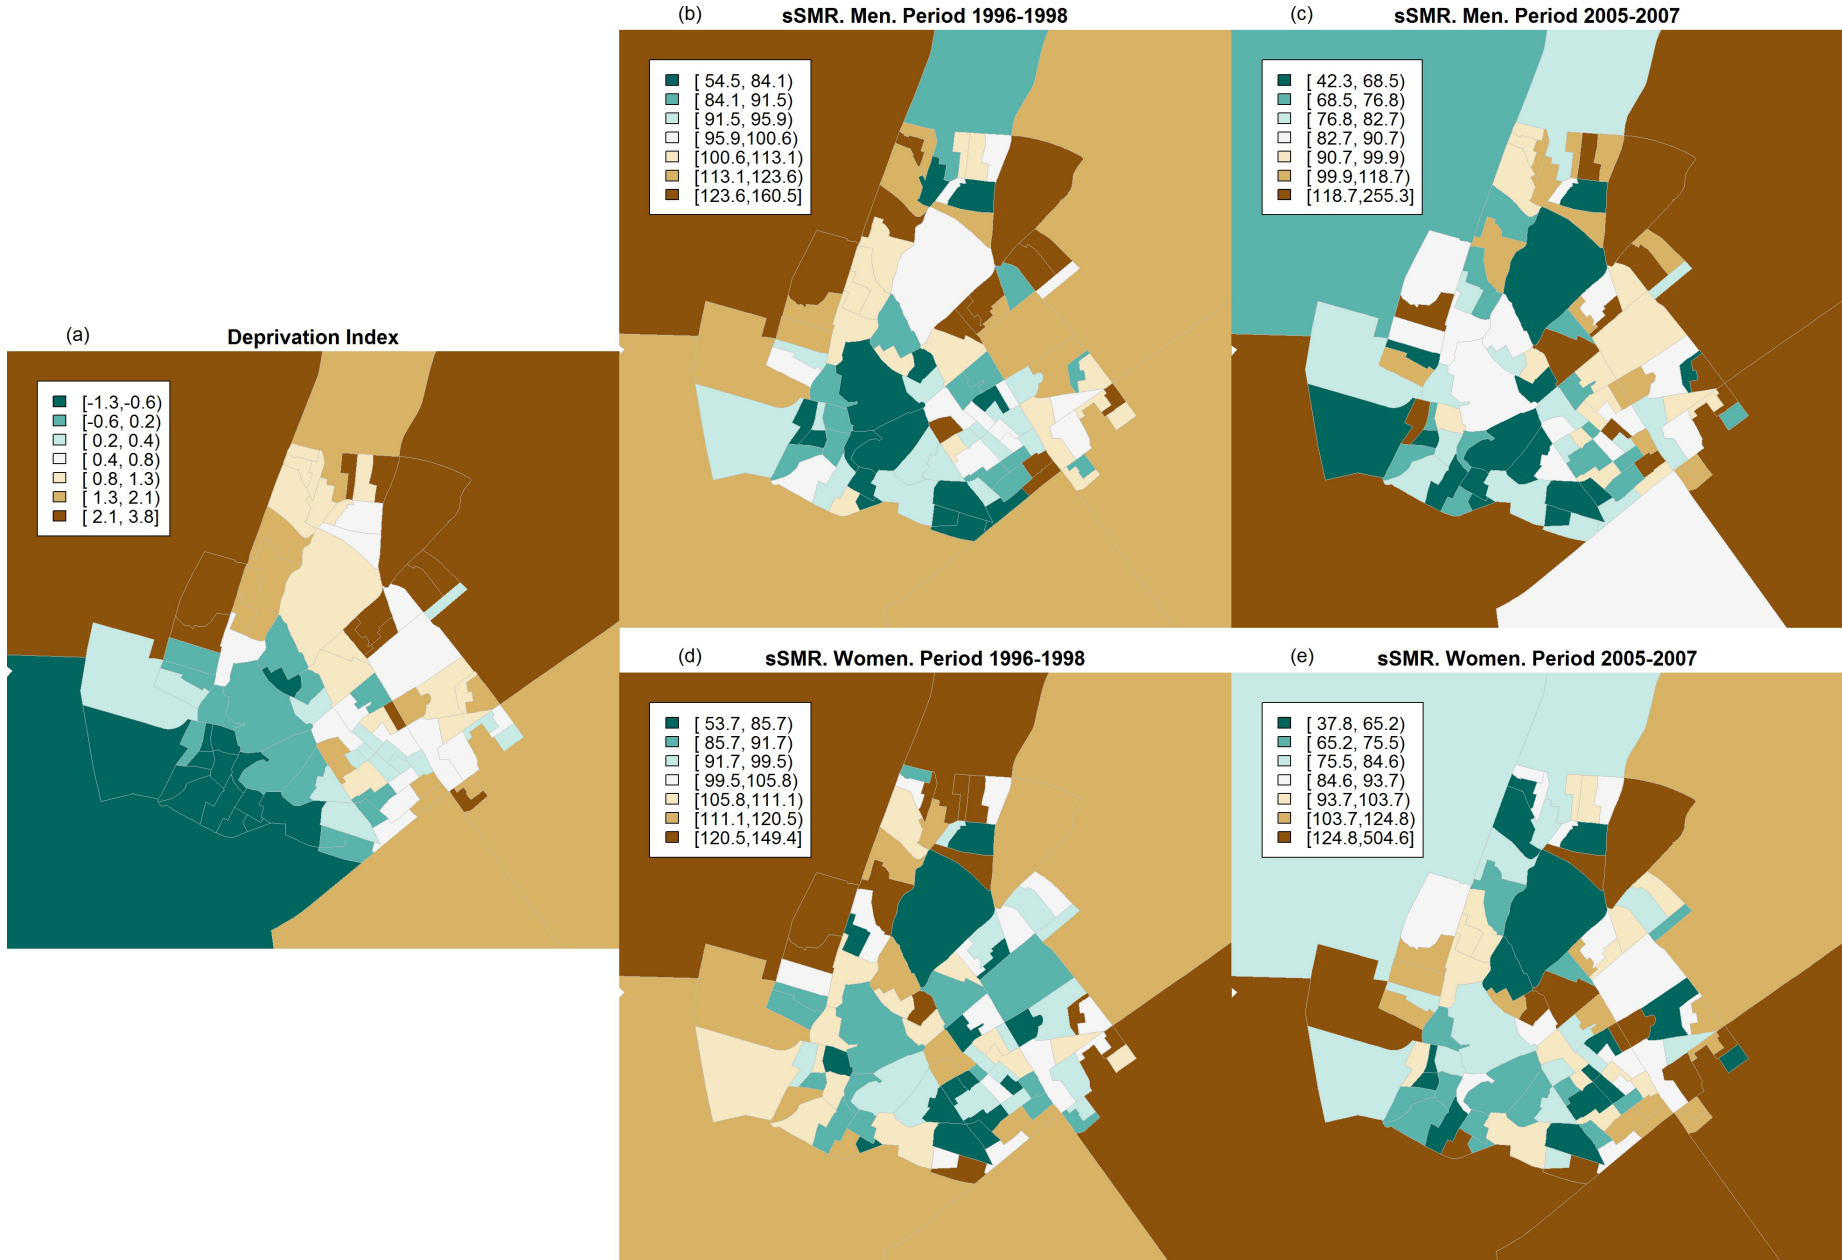



**Figure 15.** Distribution of deprivation index (a) and of the smoothed Standardised Mortality Ratios (sSMR) (b-e) for all-cause mortality, by period (1996-1998 and 2005-2007) and by sex in the city of Jaén. Green areas represent less socioeconomic deprivation and lower sSMR values. Brown areas represent greater socioeconomic deprivation and higher sSMR values.

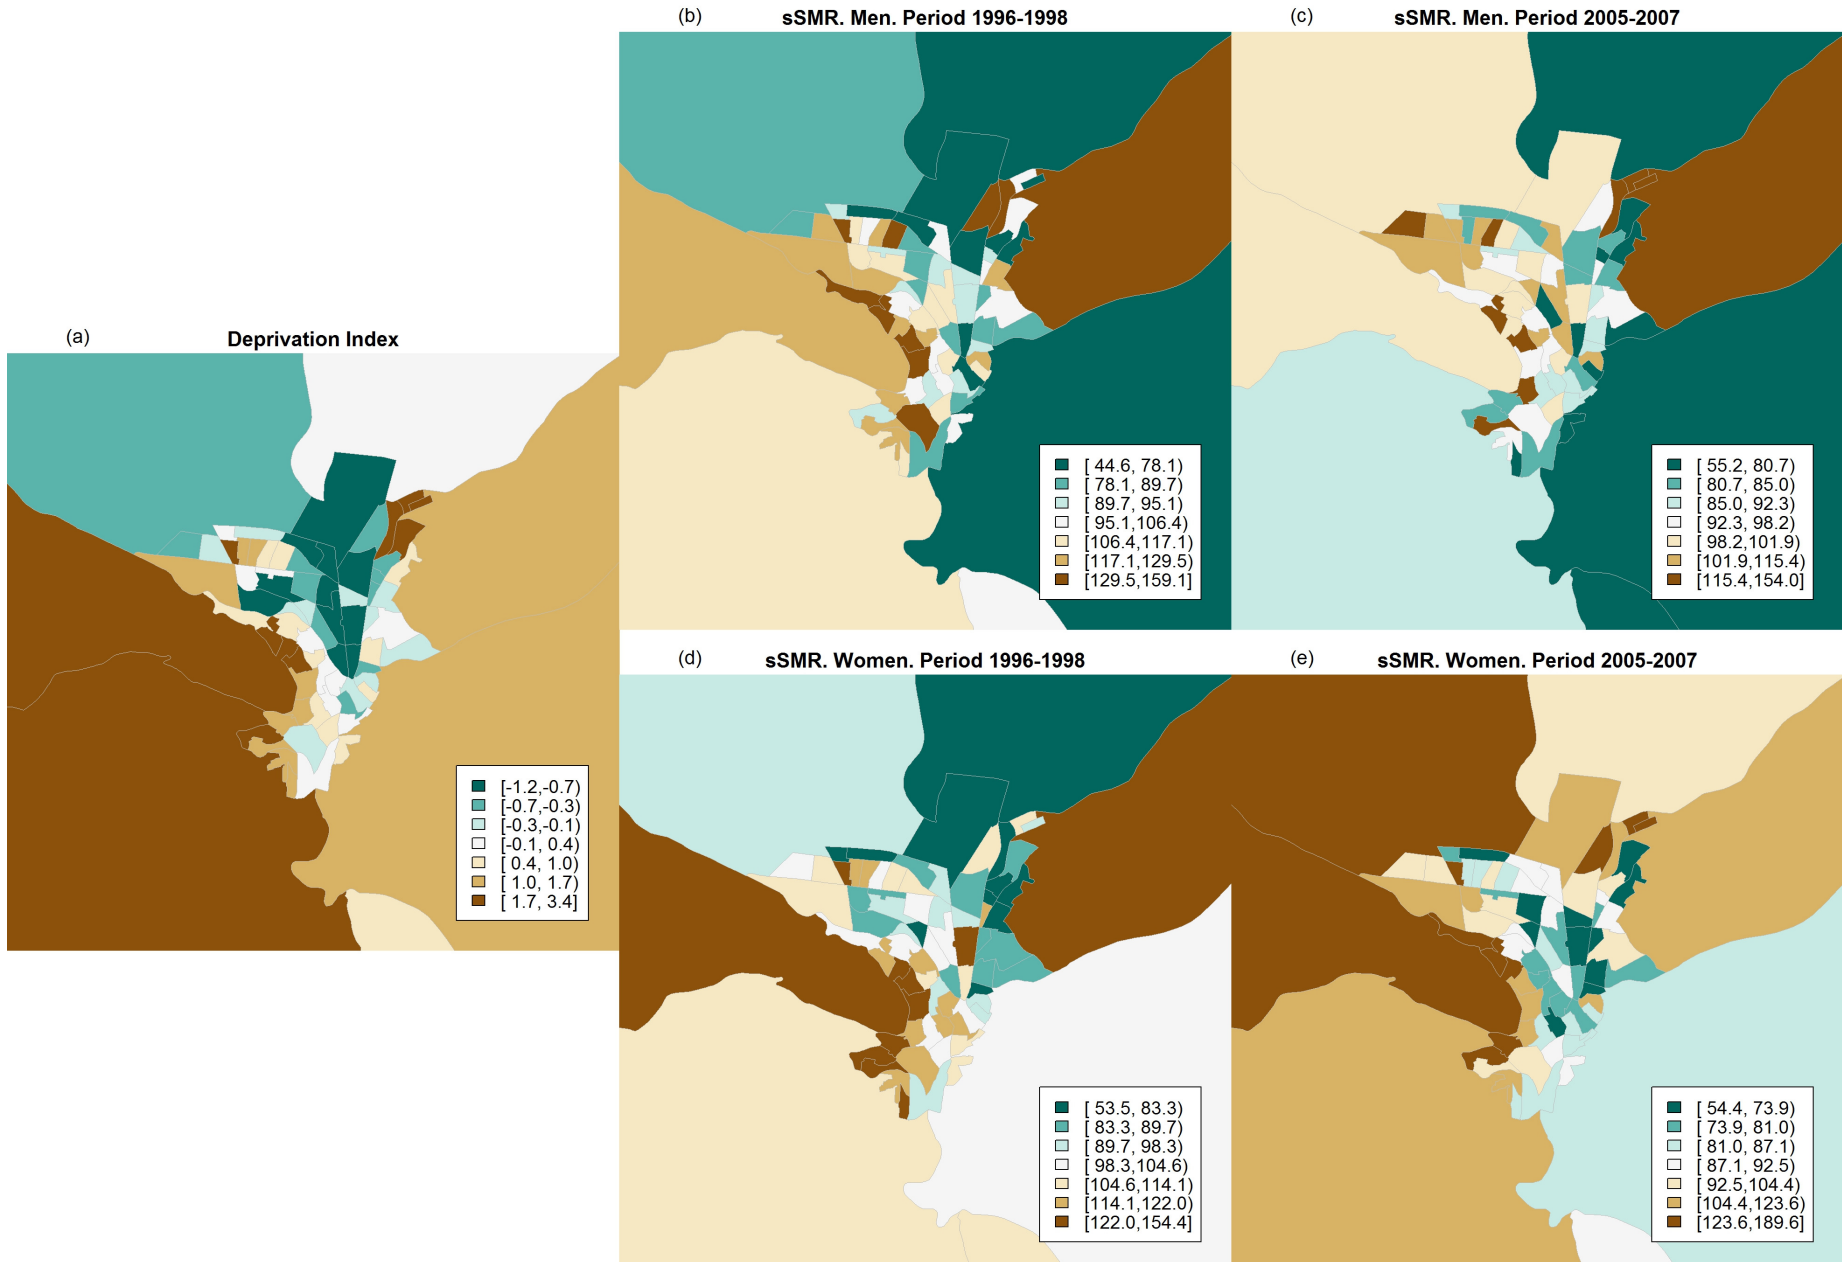

**Figure 16.** Distribution of deprivation index (a) and of the smoothed Standardised Mortality Ratios (sSMR) (b-e) for all-cause mortality, by period (1996-1998 and 2005-2007) and by sex in the city of Las Palmas. Green areas represent less socioeconomic deprivation and lower sSMR values. Brown areas represent greater socioeconomic deprivation and higher sSMR values.

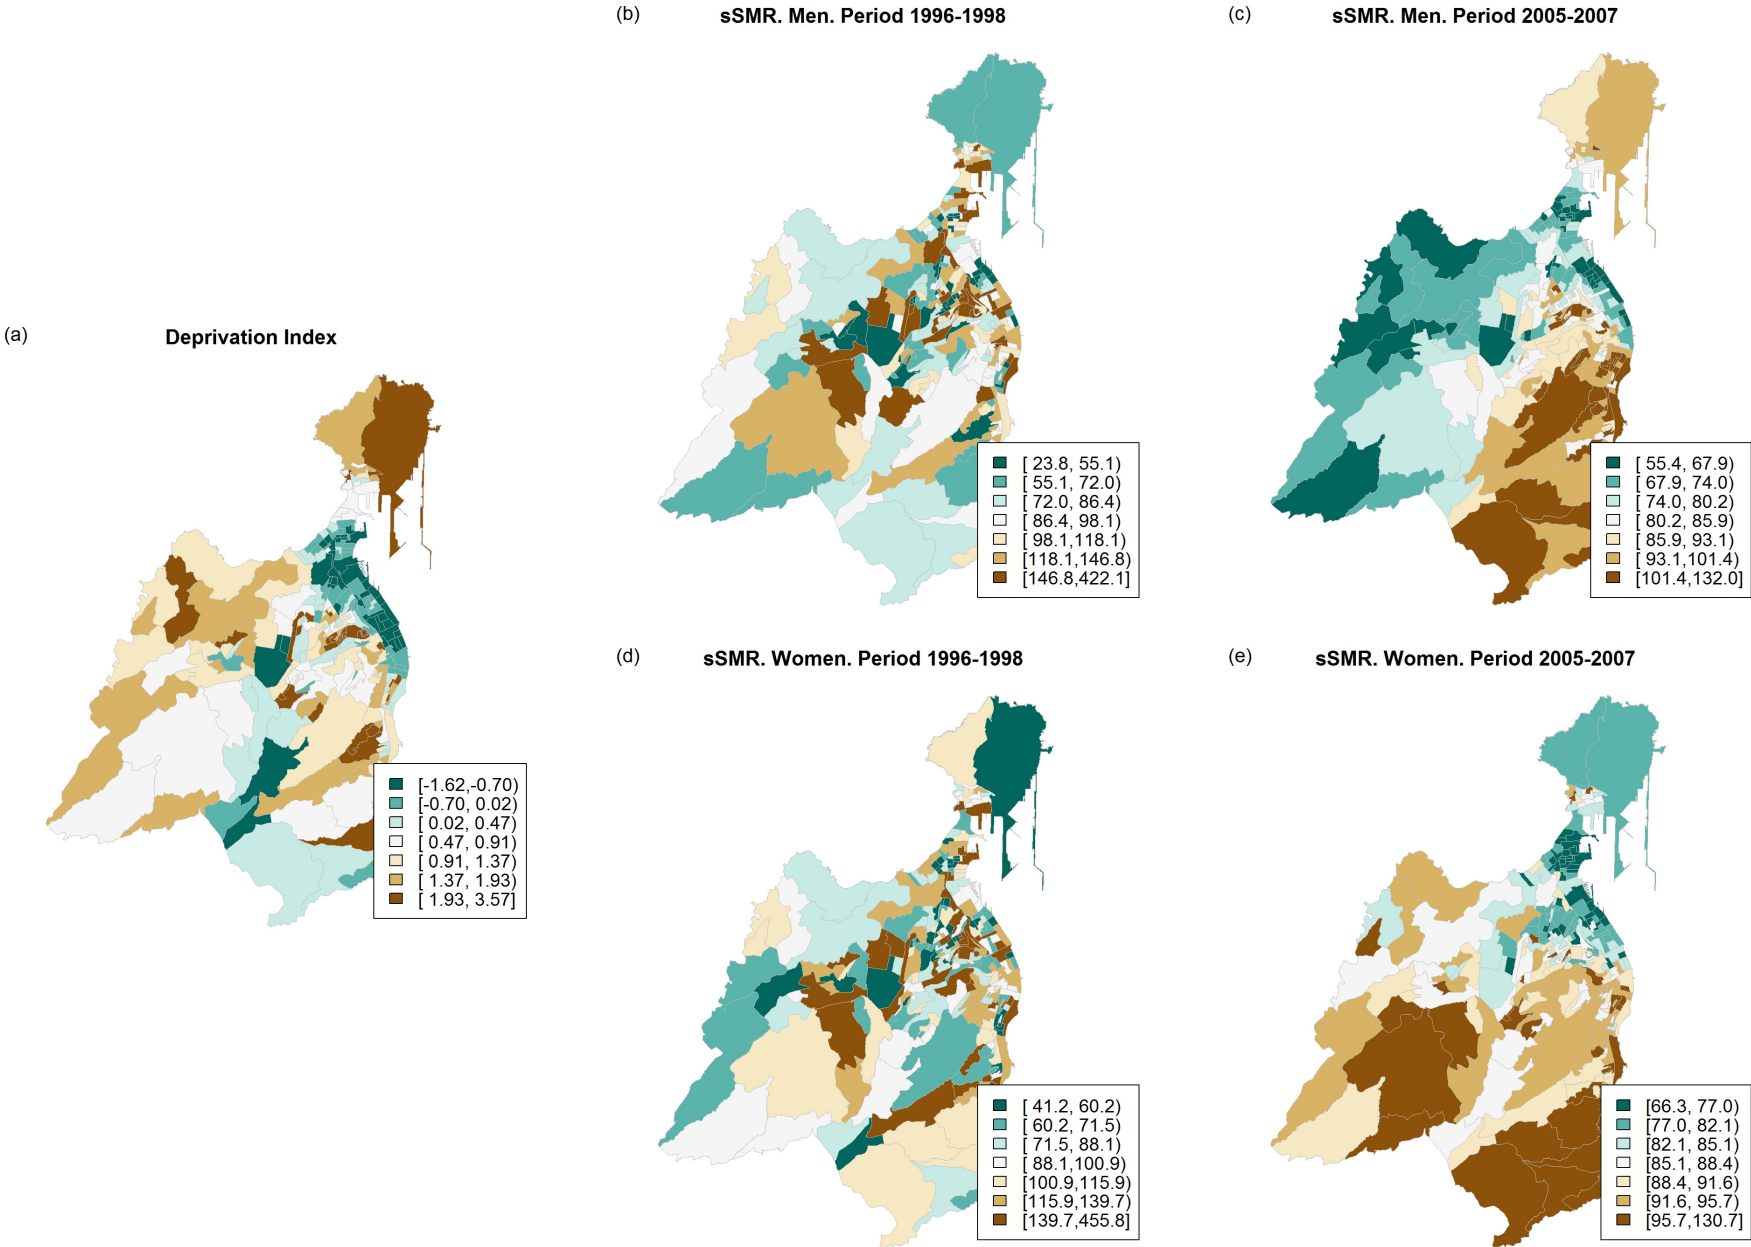

**Figure 17.** Distribution of deprivation index (a) and of the smoothed Standardised Mortality Ratios (sSMR) (b-e) for all-cause mortality, by period (1996-1998 and 2005-2007) and by sex in the city of Logroño. Green areas represent less socioeconomic deprivation and lower sSMR values. Brown areas represent greater socioeconomic deprivation and higher sSMR values.

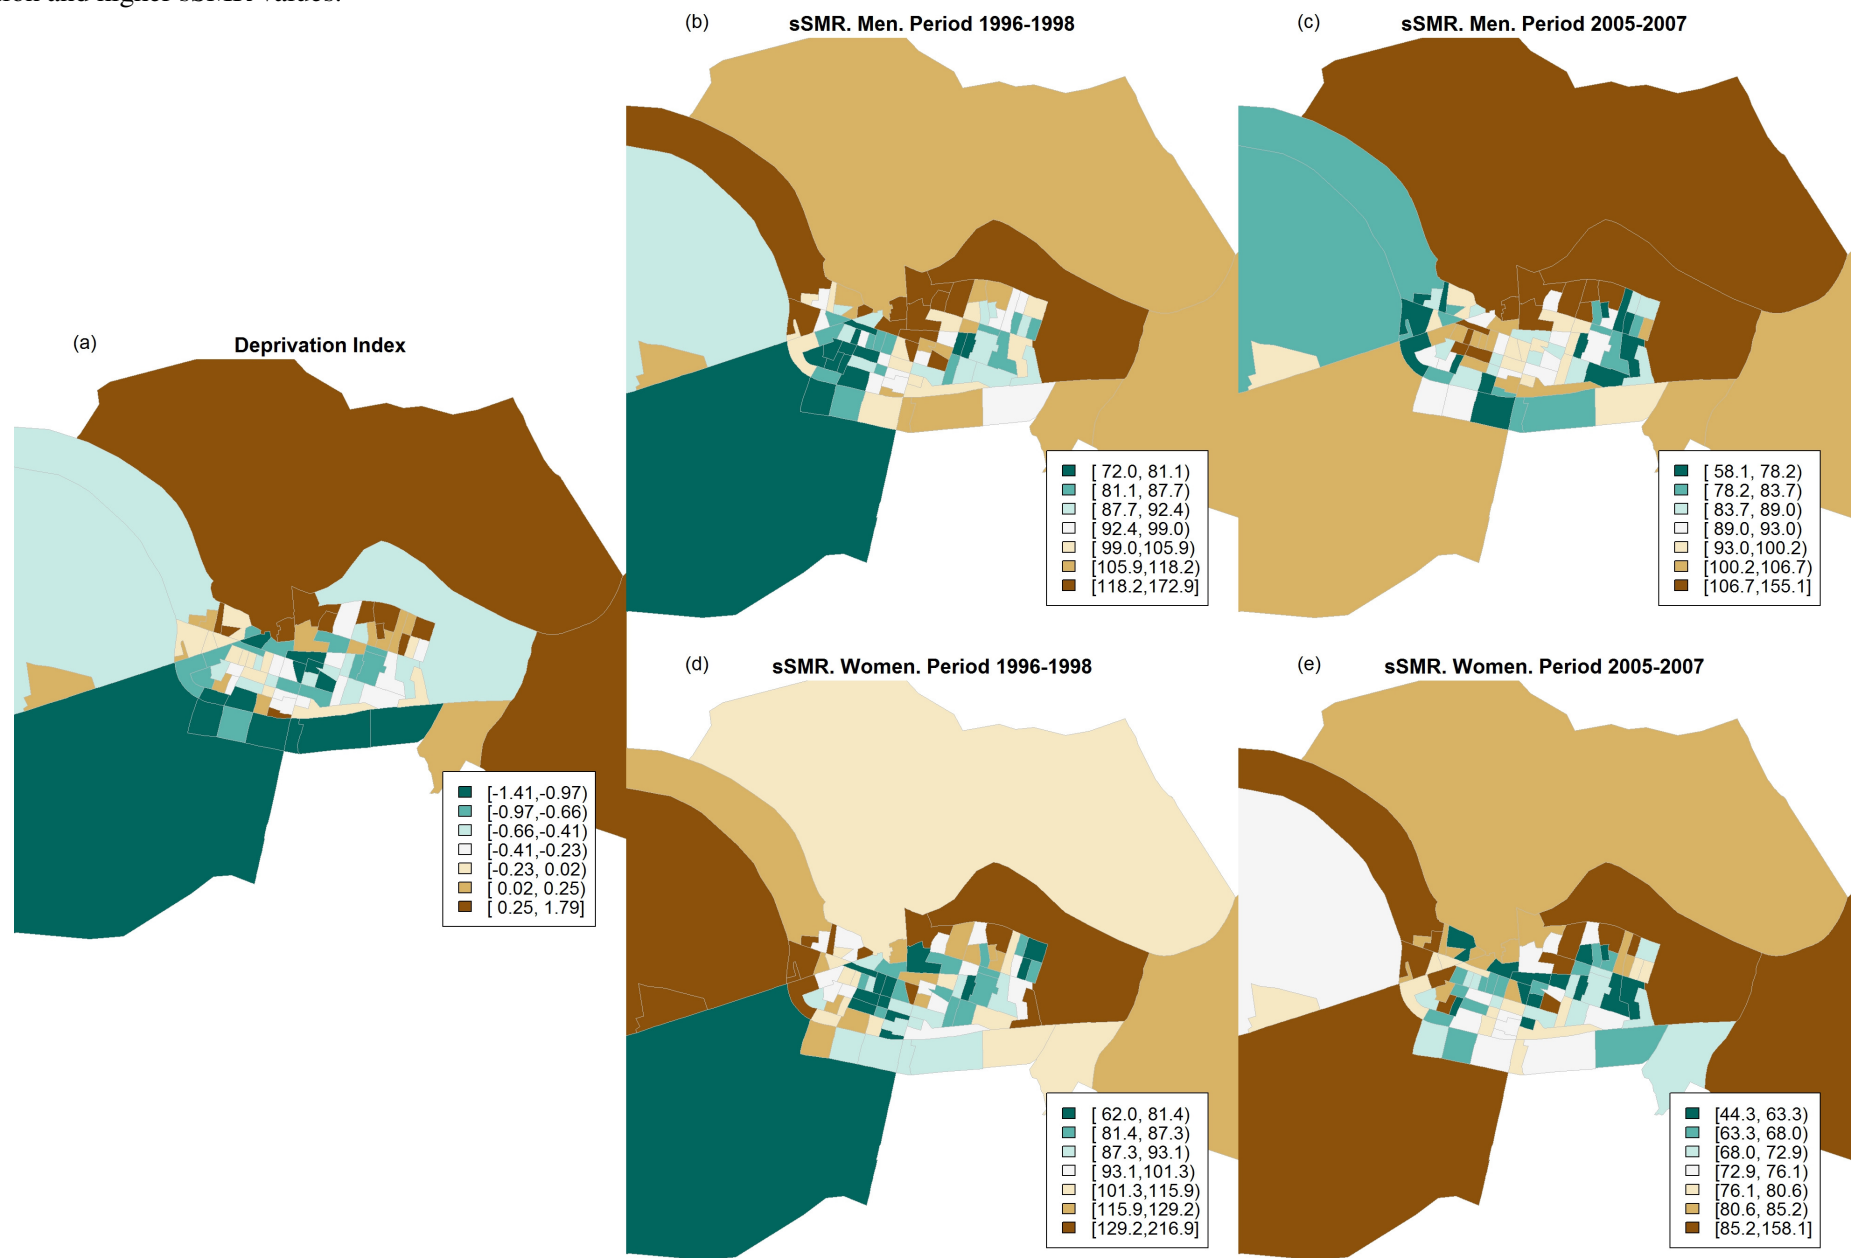



**Figure 18.** Distribution of deprivation index (a) and of the smoothed Standardised Mortality Ratios (sSMR) (b-e) for all-cause mortality, by period (1996-1998 and 2005-2007) and by sex in the city of Lugo. Green areas represent less socioeconomic deprivation and lower sSMR values. Brown areas represent greater socioeconomic deprivation and higher sSMR values.

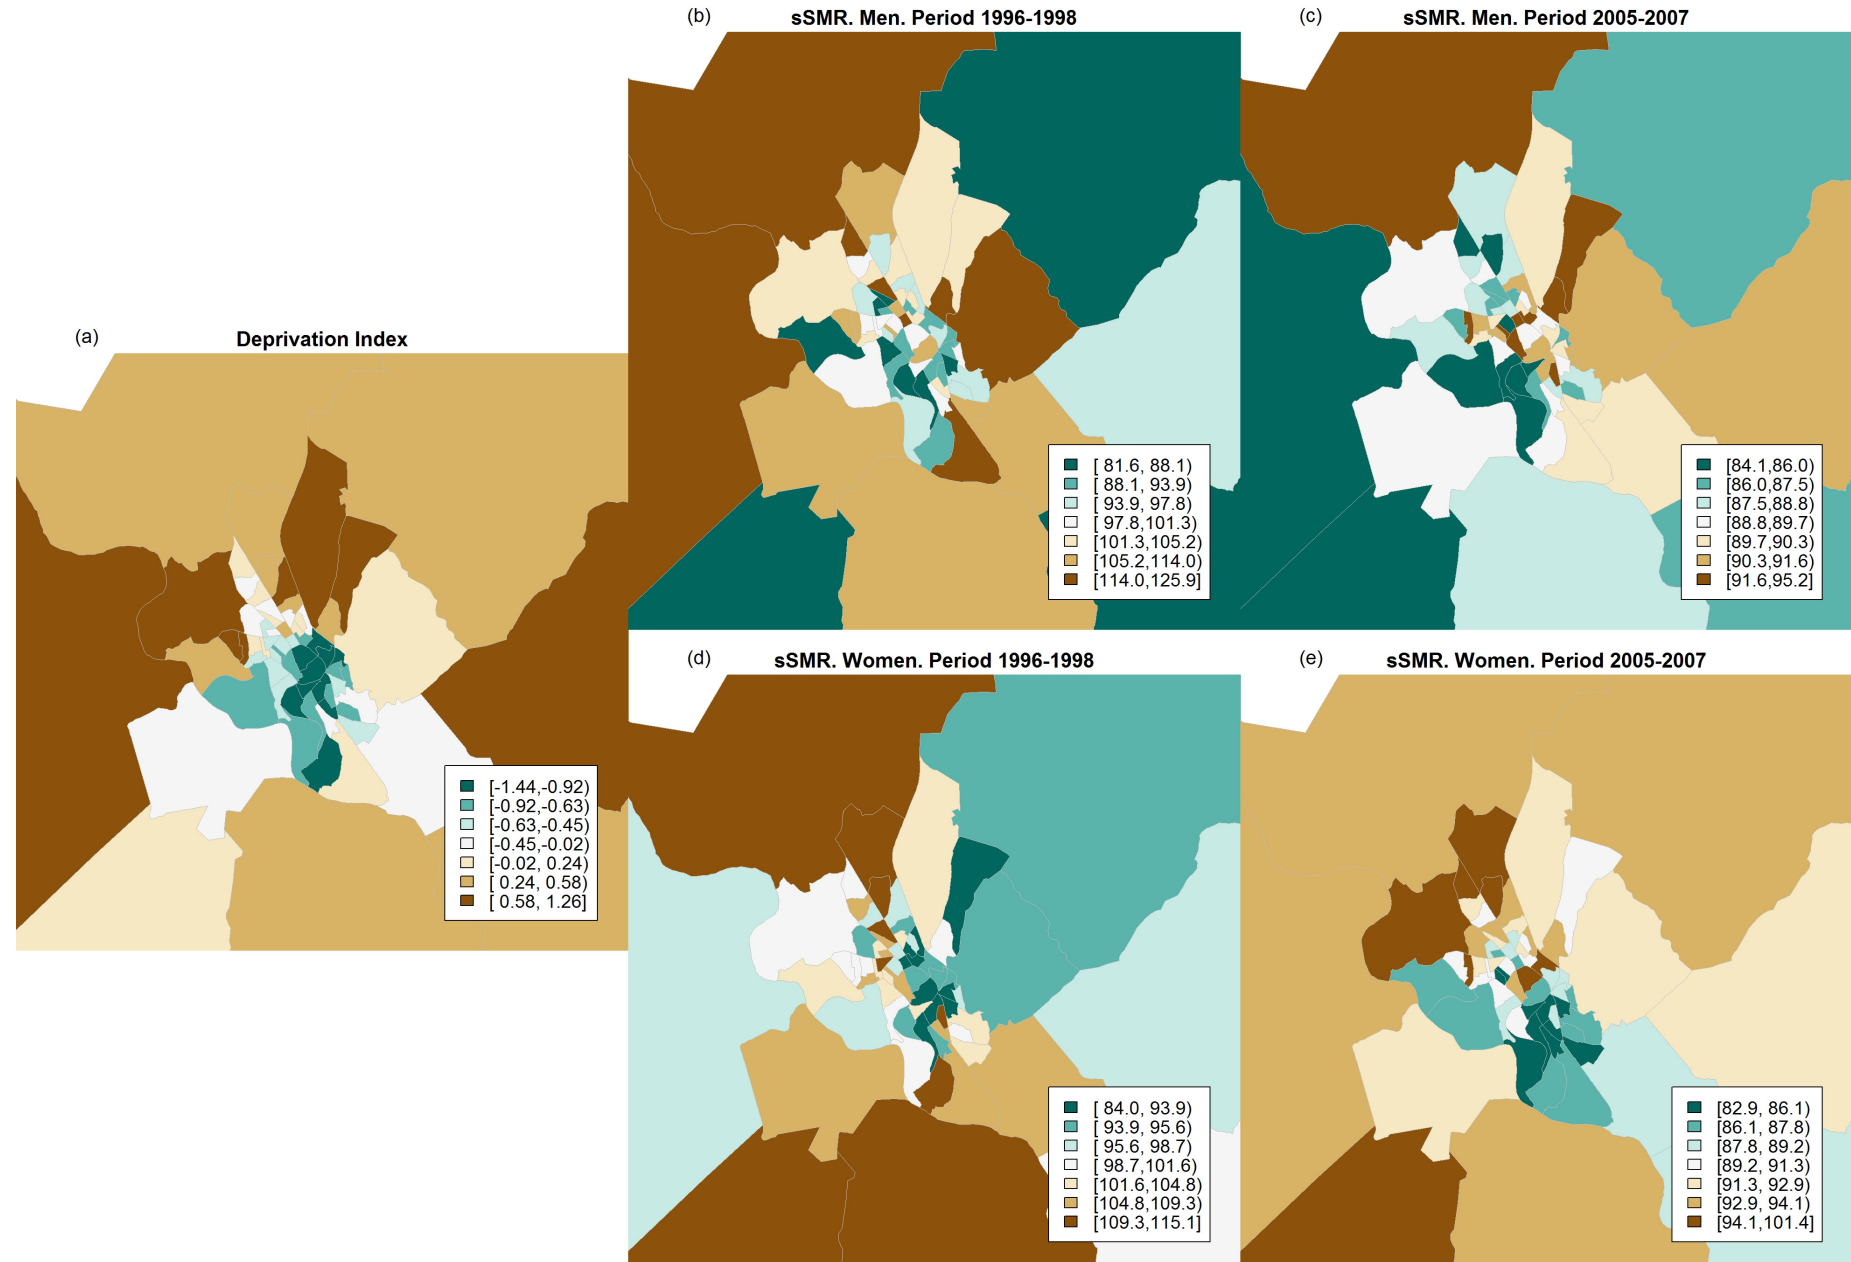

**Figure 19.** Distribution of deprivation index (a) and of the smoothed Standardised Mortality Ratios (sSMR) (b-e) for all-cause mortality, by period (1996-1998 and 2005-2007) and by sex in the city of Madrid. Green areas represent less socioeconomic deprivation and lower sSMR values. Brown areas represent greater socioeconomic deprivation and higher sSMR values.

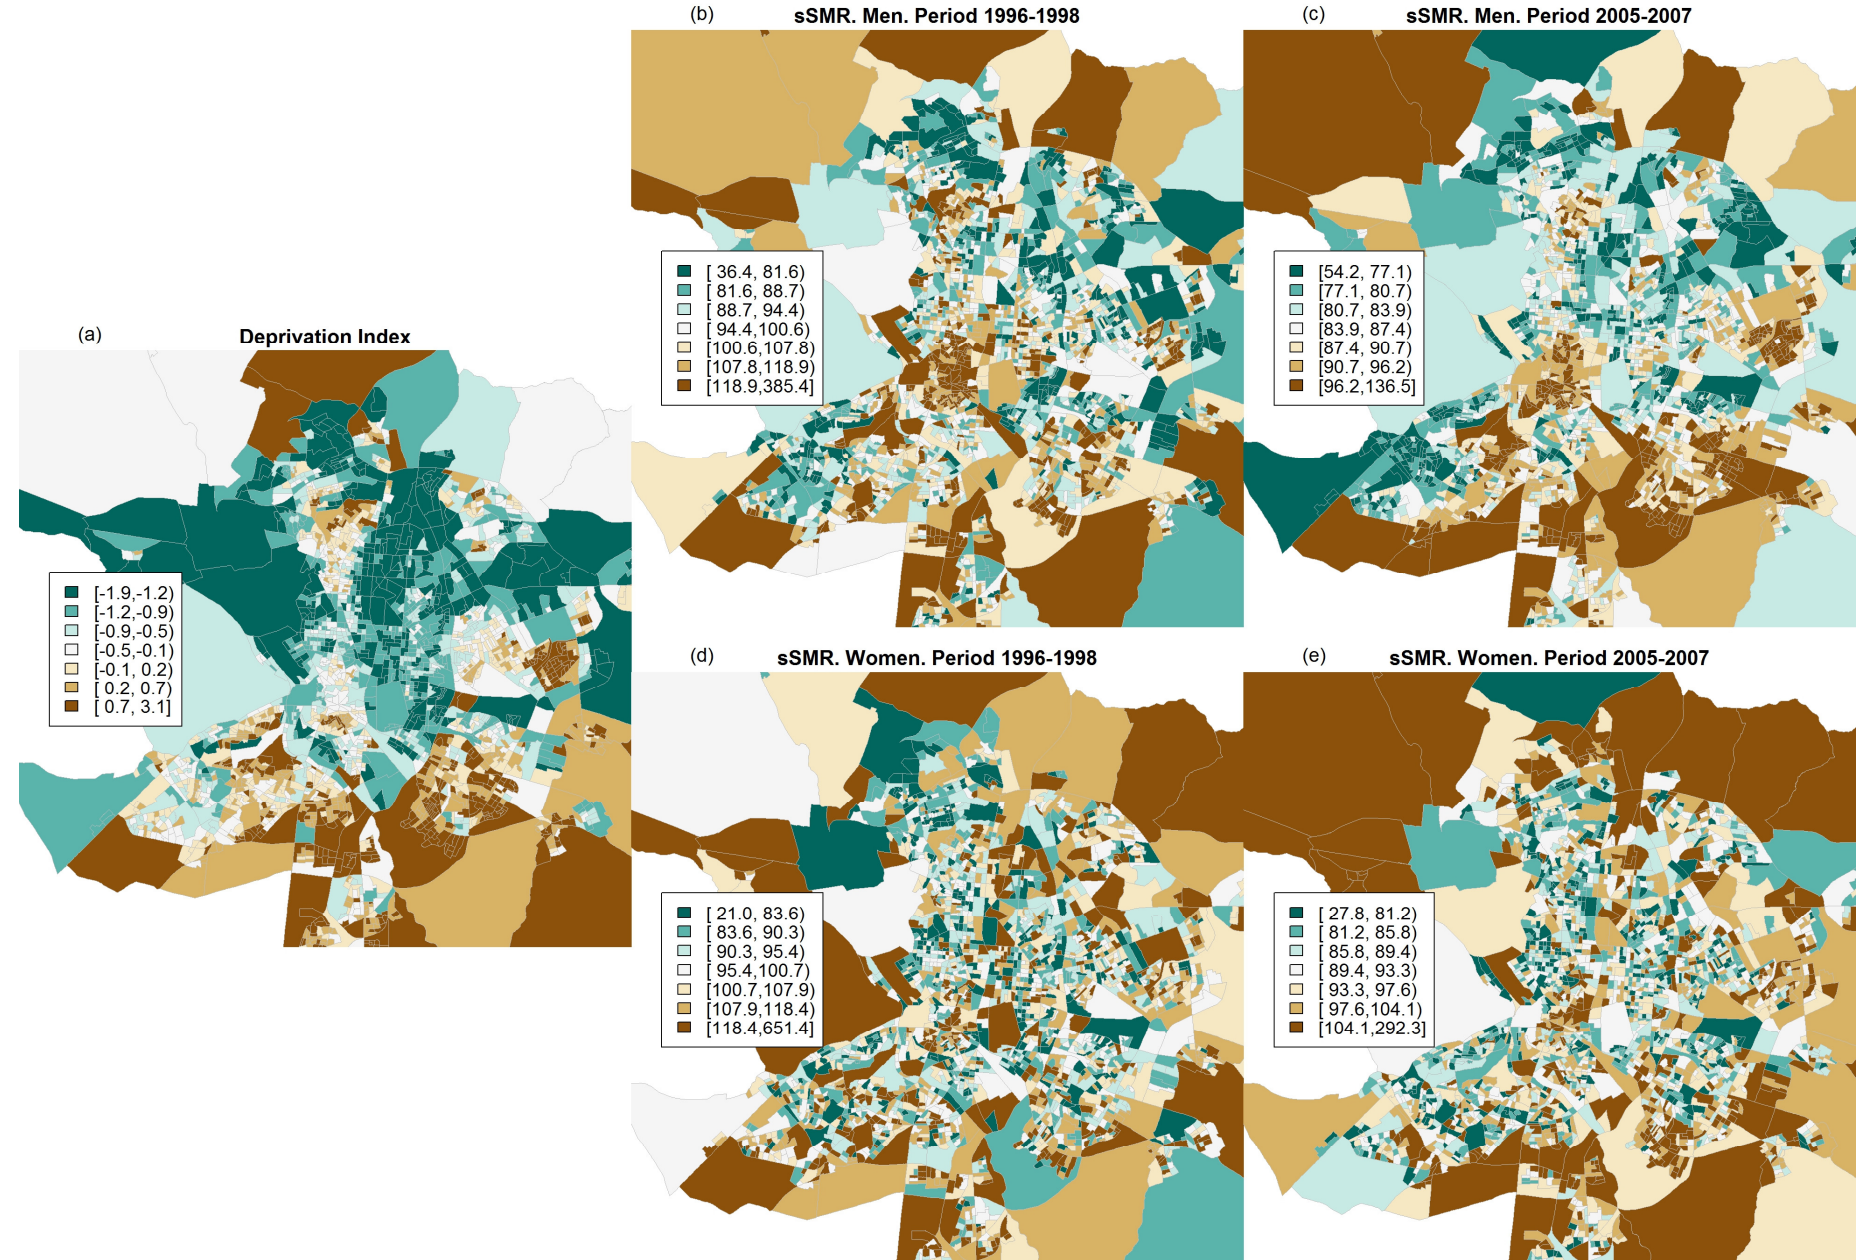

**Figure 20.** Distribution of deprivation index (a) and of the smoothed Standardised Mortality Ratios (sSMR) (b-e) for all-cause mortality, by period (1996-1998 and 2005-2007) and by sex in the city of Málaga. Green areas represent less socioeconomic deprivation and lower sSMR values. Brown areas represent greater socioeconomic deprivation and higher sSMR values.

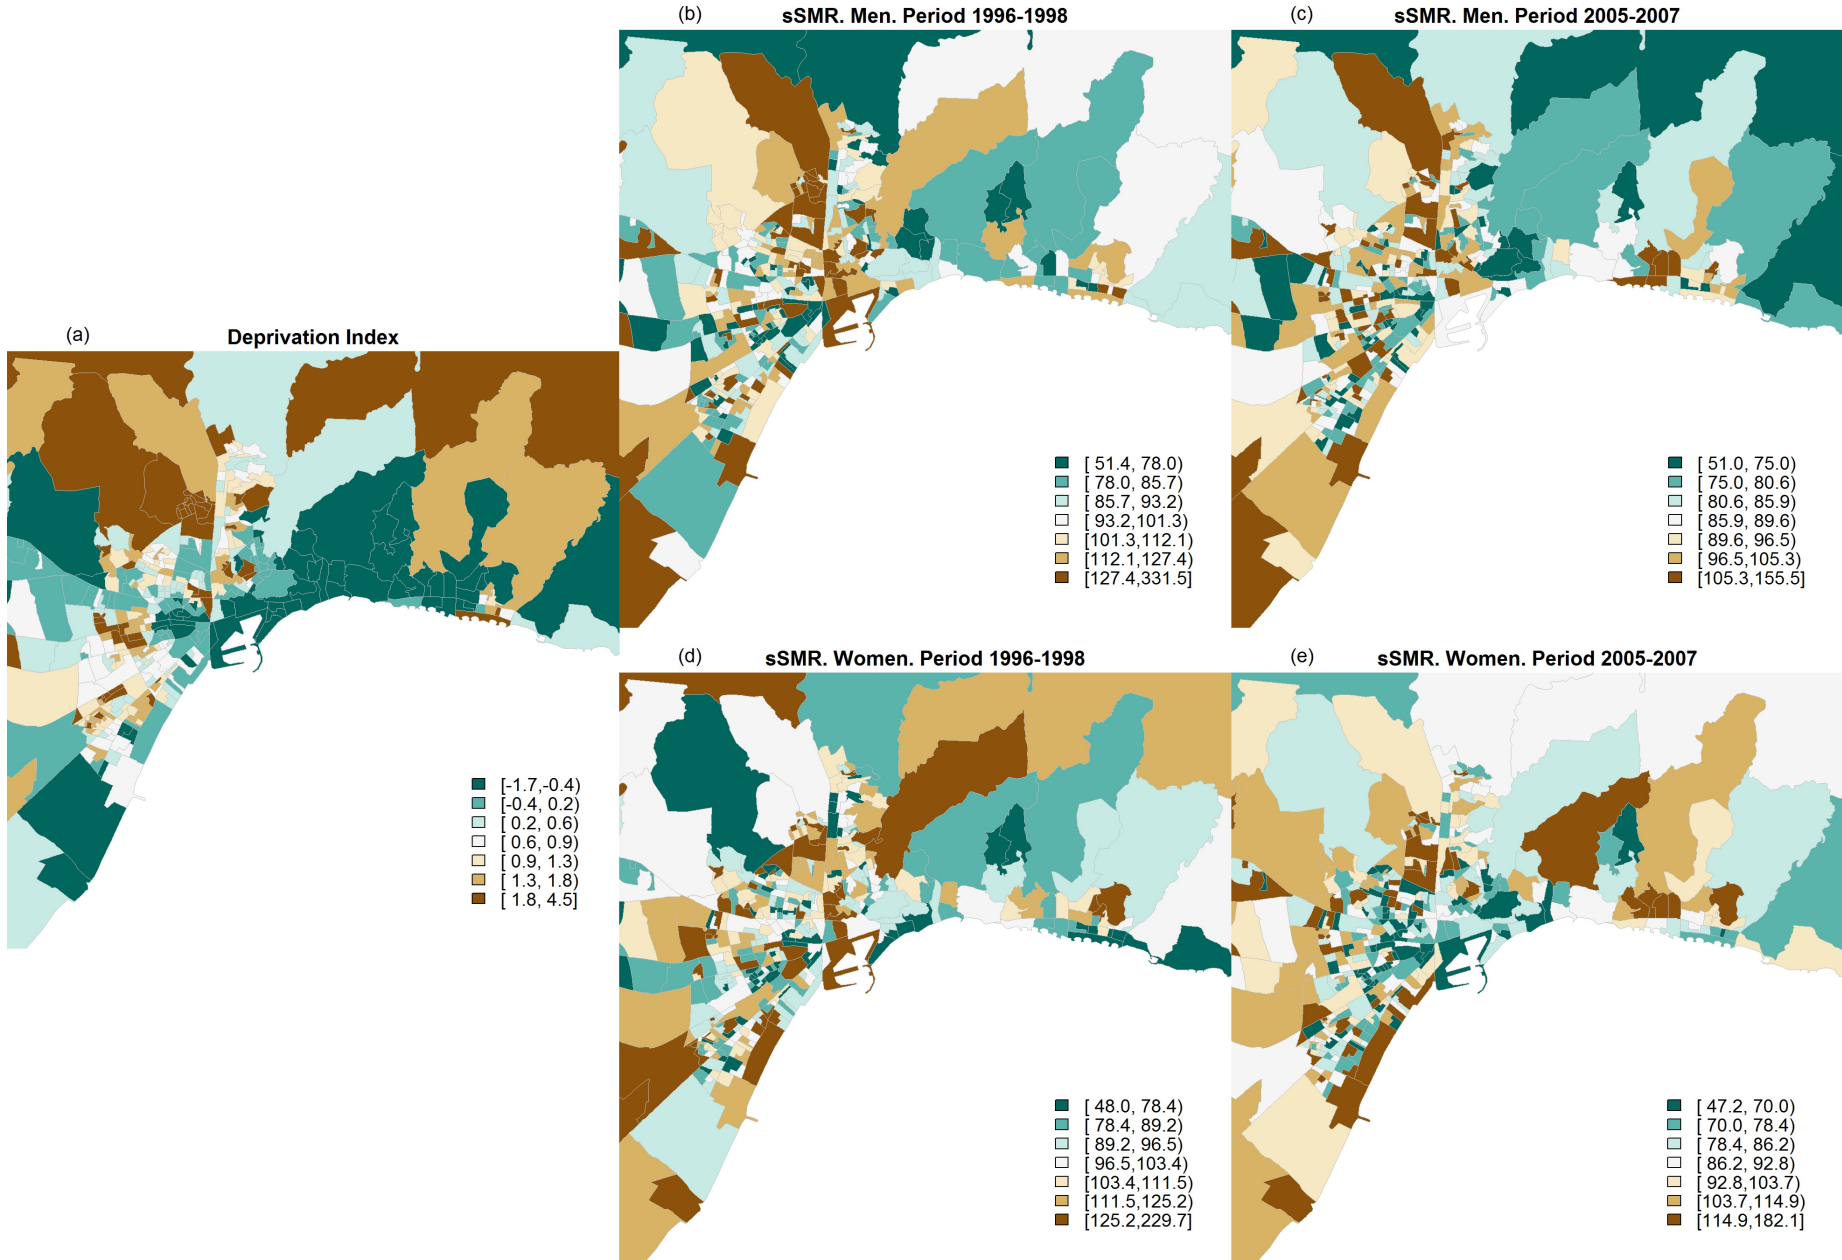



**Figure 21.** Distribution of deprivation index (a) and of the smoothed Standardised Mortality Ratios (sSMR) (b-e) for all-cause mortality, by period (1996-1998 and 2005-2007) and by sex in the city of Murcia. Green areas represent less socioeconomic deprivation and lower sSMR values. Brown areas represent greater socioeconomic deprivation and higher sSMR values.

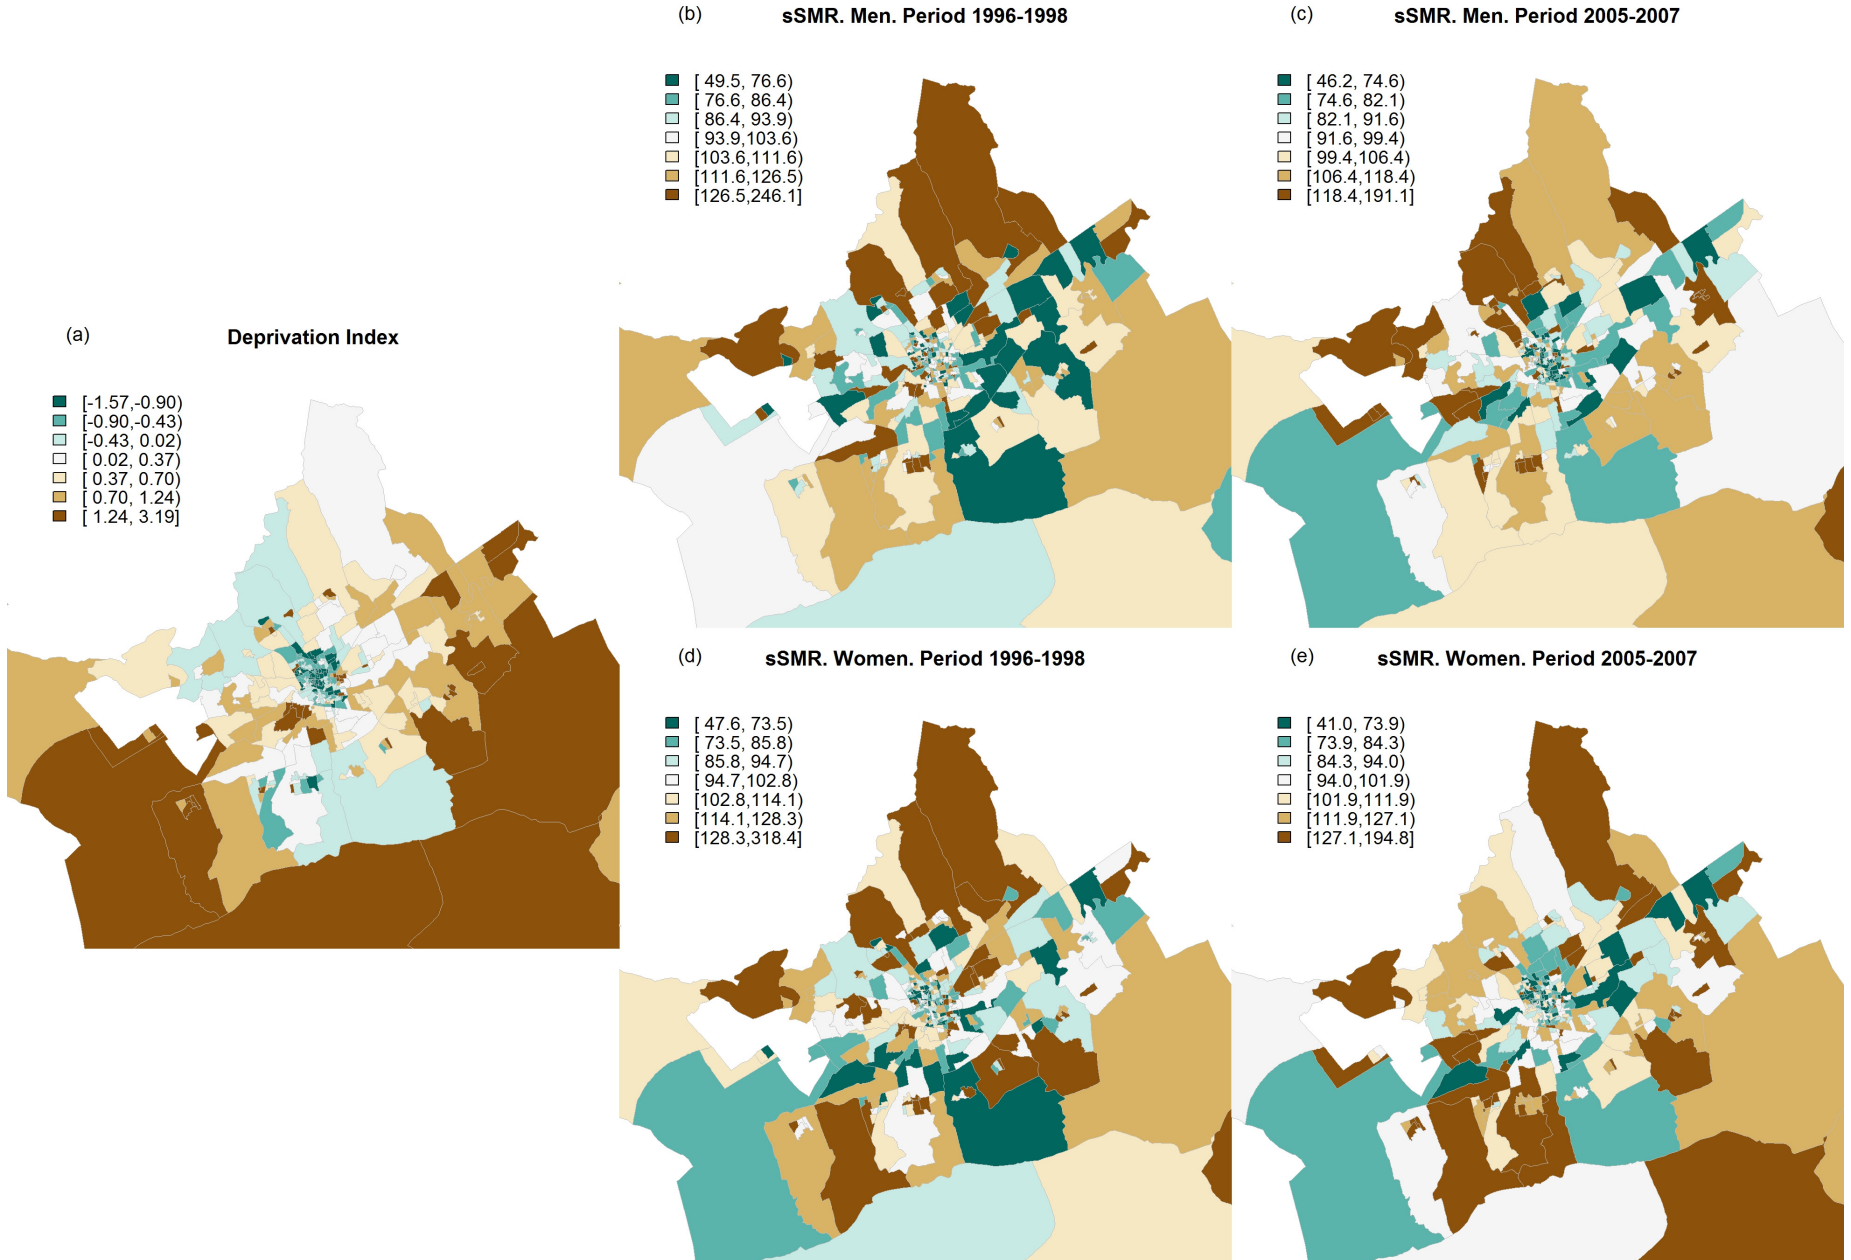

**Figure 22.** Distribution of deprivation index (a) and of the smoothed Standardised Mortality Ratios (sSMR) (b-e) for all-cause mortality, by period (1996-1998 and 2005-2007) and by sex in the city of Ourense. Green areas represent less socioeconomic deprivation and lower sSMR values. Brown areas represent greater socioeconomic deprivation and higher sSMR values.

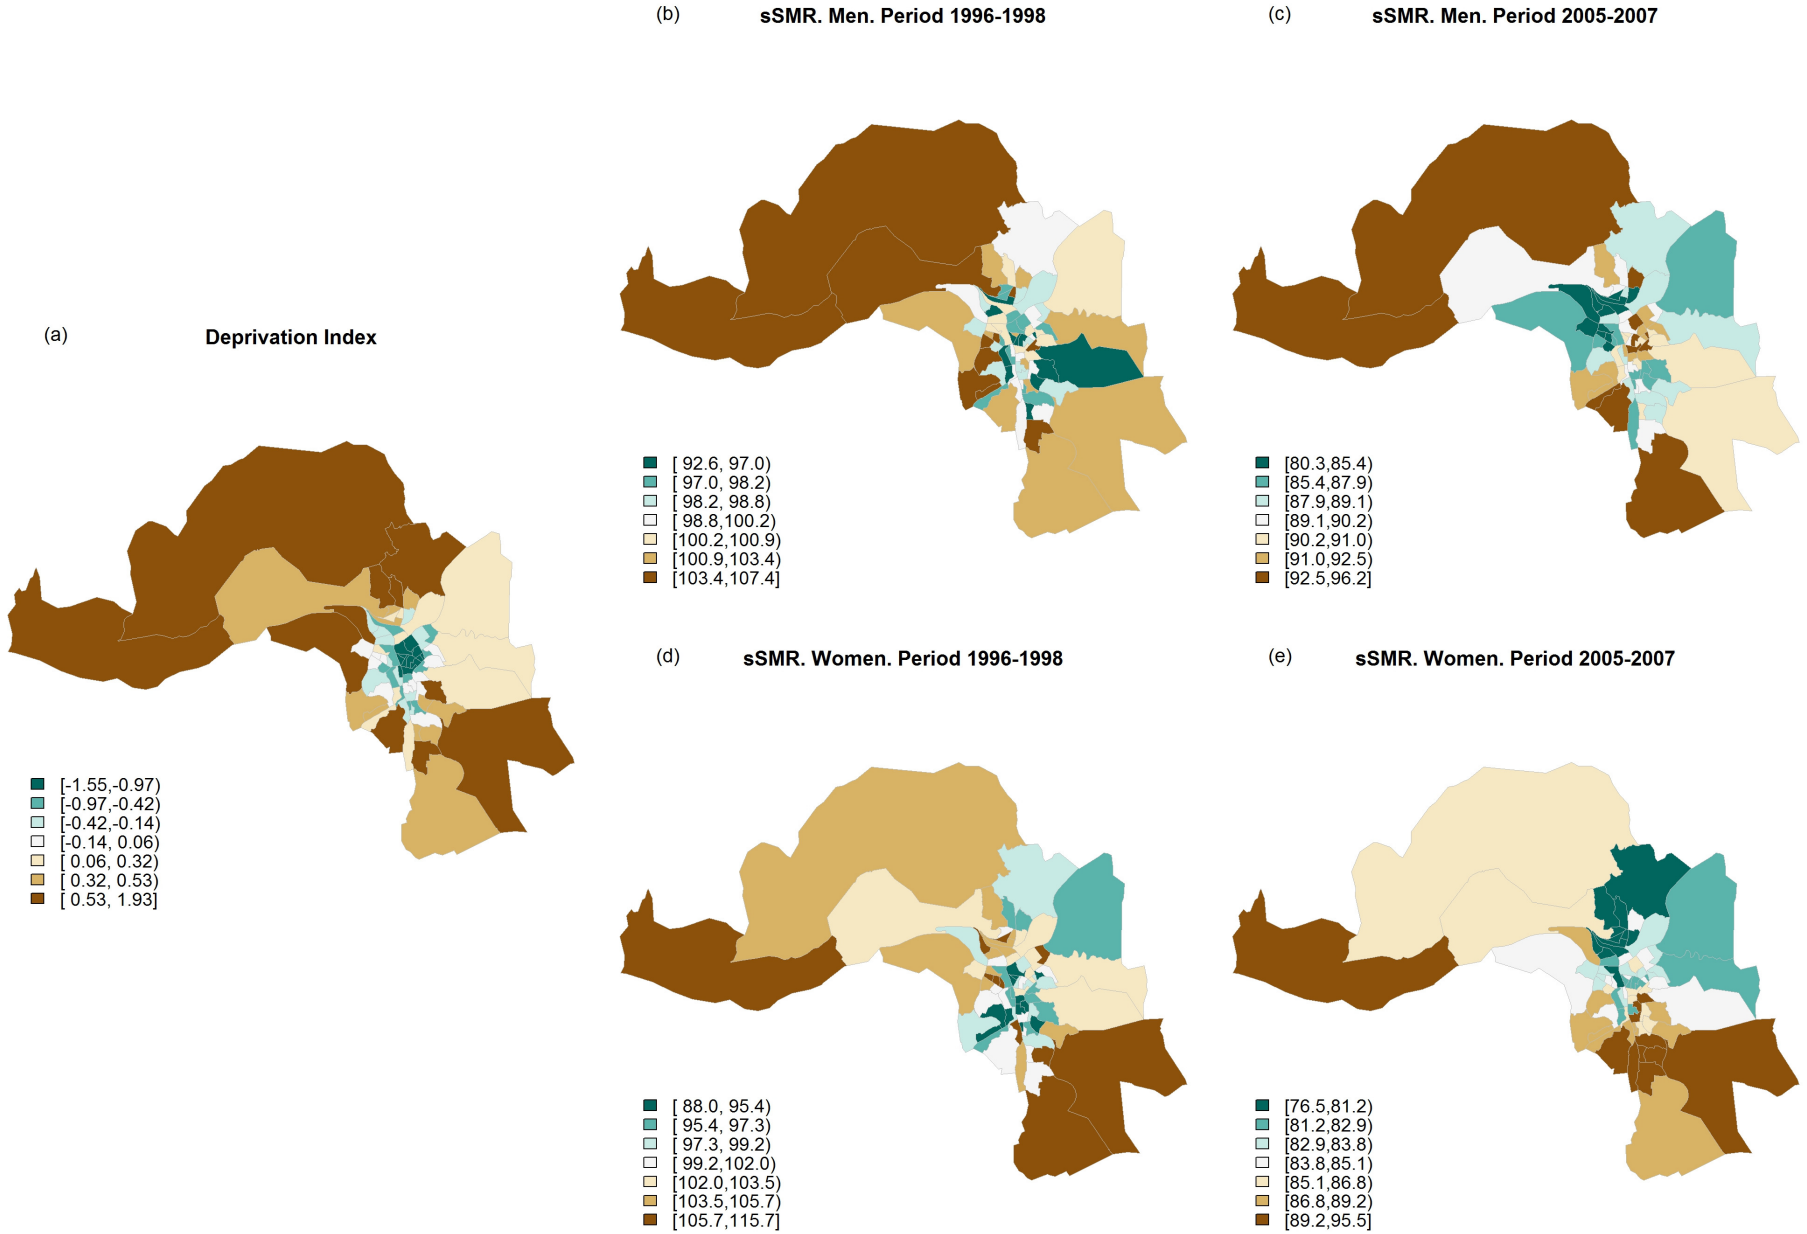

**Figure 23.** Distribution of deprivation index (a) and of the smoothed Standardised Mortality Ratios (sSMR) (b-e) for all-cause mortality, by period (1996-1998 and 2005-2007) and by sex in the city of Oviedo. Green areas represent less socioeconomic deprivation and lower sSMR values. Brown areas represent greater socioeconomic deprivation and higher sSMR values.

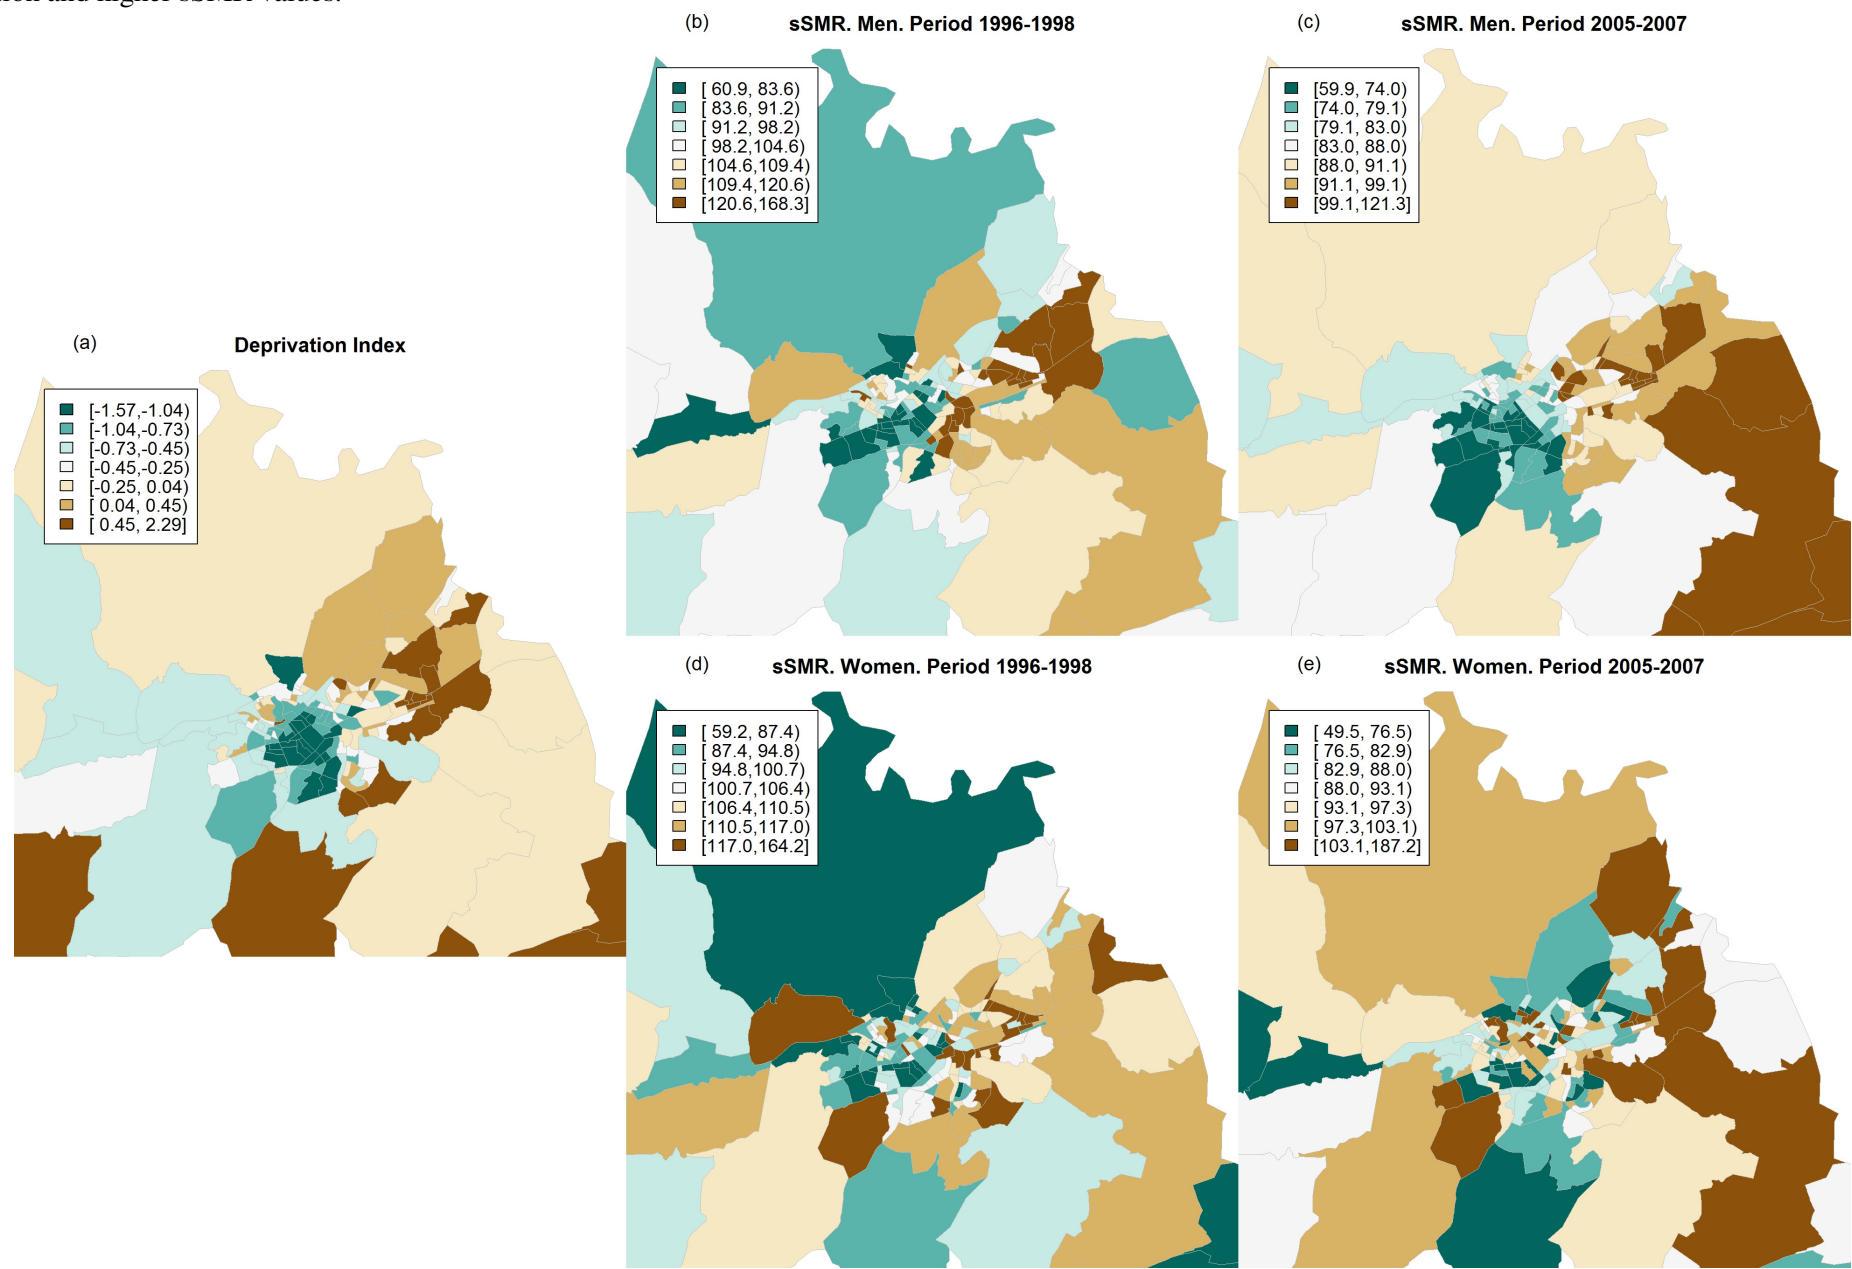

**Figure 24.** Distribution of deprivation index (a) and of the smoothed Standardised Mortality Ratios (sSMR) (b-e) for all-cause mortality, by period (1996-1998 and 2005-2007) and by sex in the city of Pamplona. Green areas represent less socioeconomic deprivation and lower sSMR values. Brown areas represent greater socioeconomic deprivation and higher sSMR values.

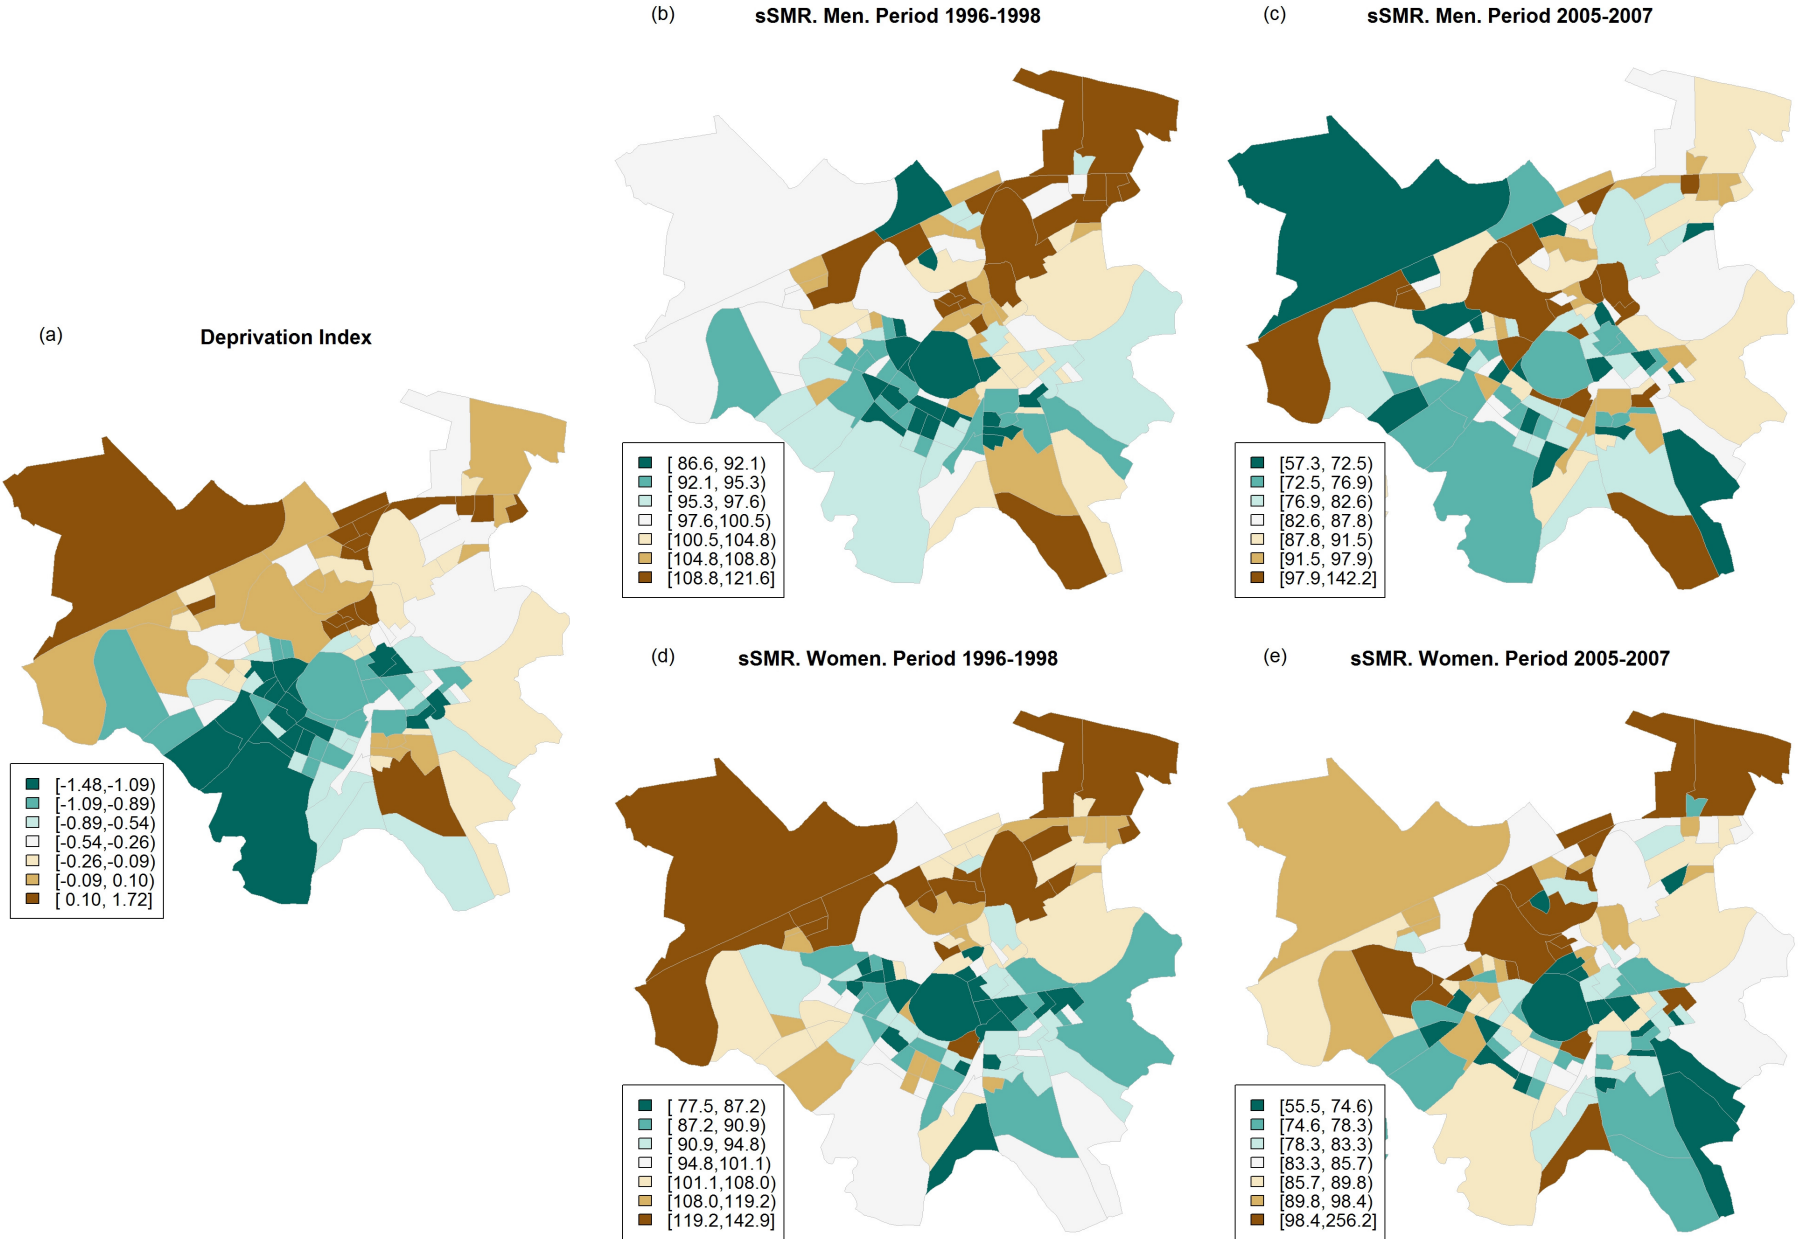

**Figure 25.** Distribution of deprivation index (a) and of the smoothed Standardised Mortality Ratios (sSMR) (b-e) for all-cause mortality, by period (1996-1998 and 2005-2007) and by sex in the city of Pontevedra. Green areas represent less socioeconomic deprivation and lower sSMR values. Brown areas represent greater socioeconomic deprivation and higher sSMR values.

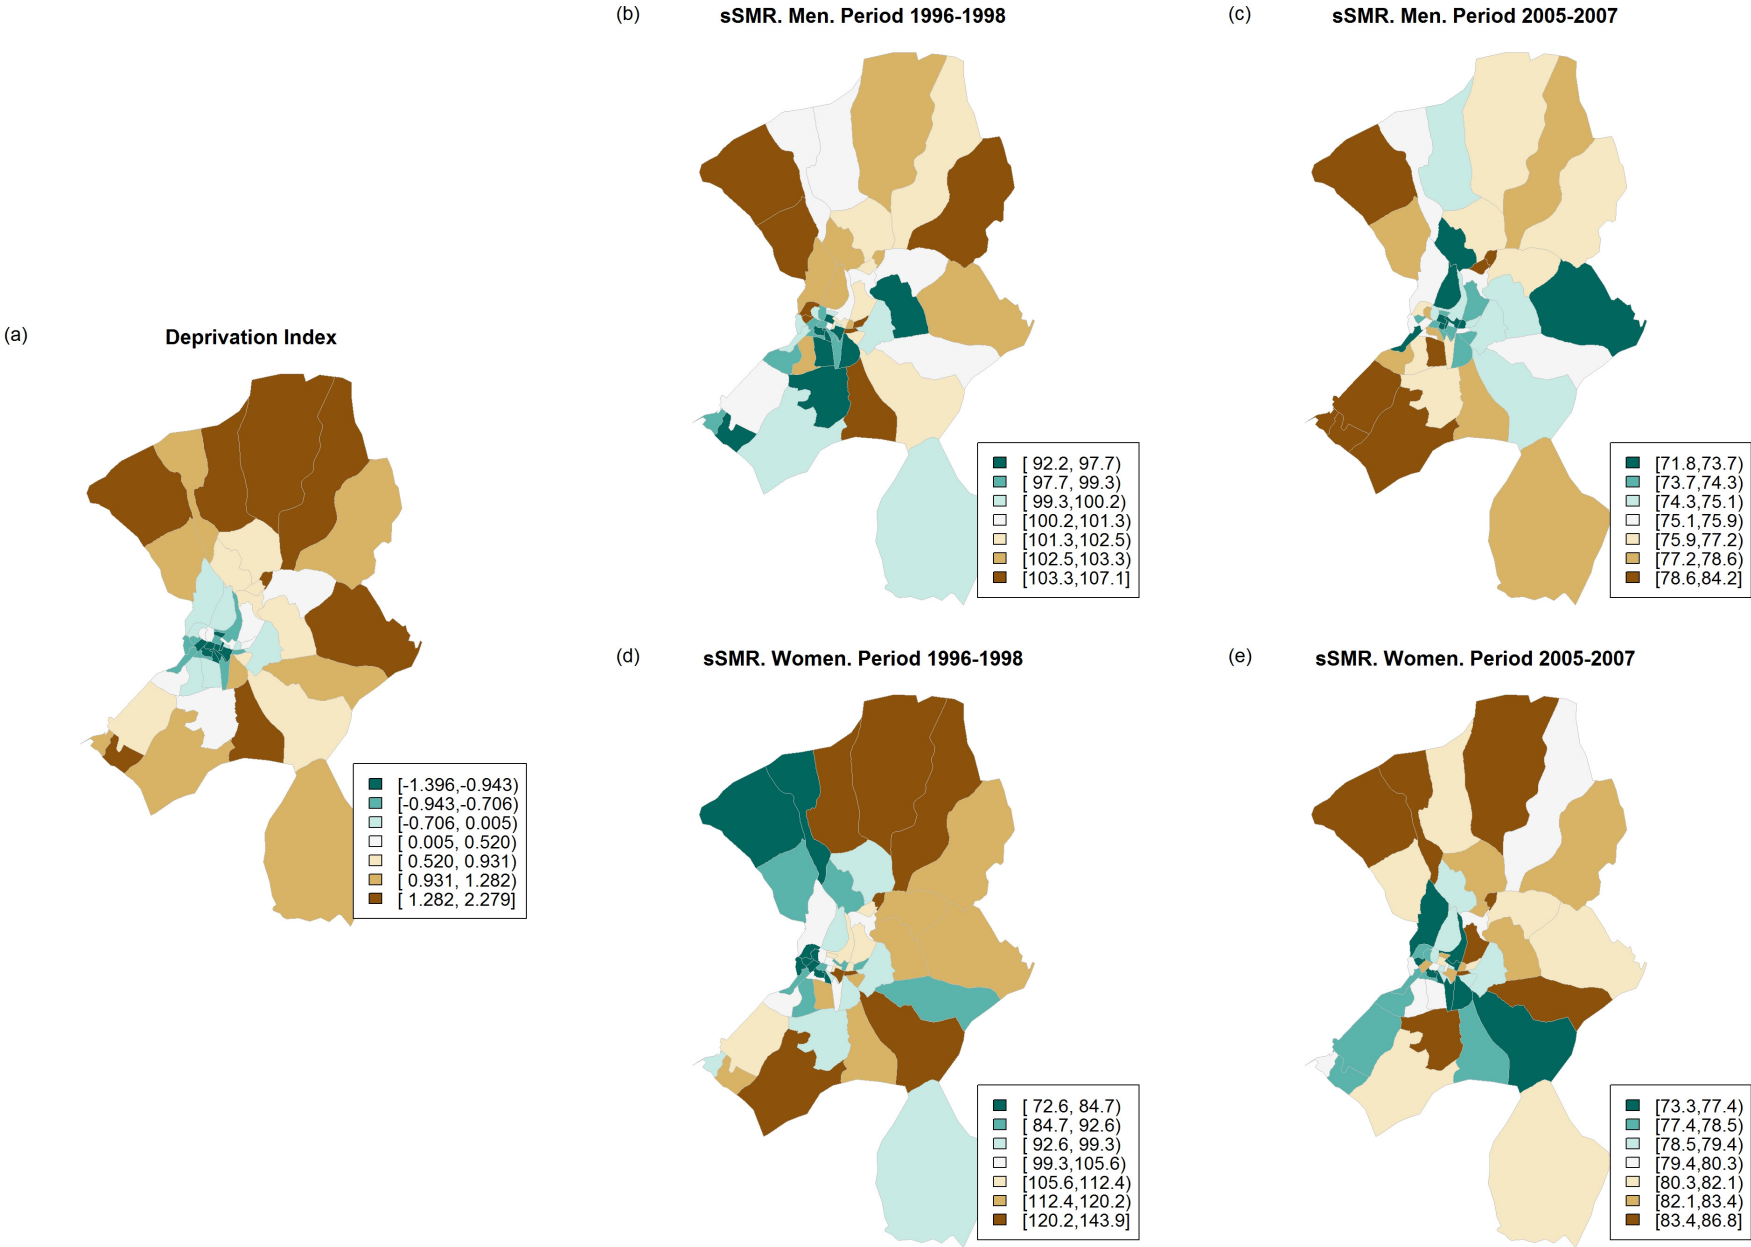



**Figure 26.** Distribution of deprivation index (a) and of the smoothed Standardised Mortality Ratios (sSMR) (b-e) for all-cause mortality, by period (1996-1998 and 2005-2007) and by sex in the city of San Sebastián. Green areas represent less socioeconomic deprivation and lower sSMR values. Brown areas represent greater socioeconomic deprivation and higher sSMR values.

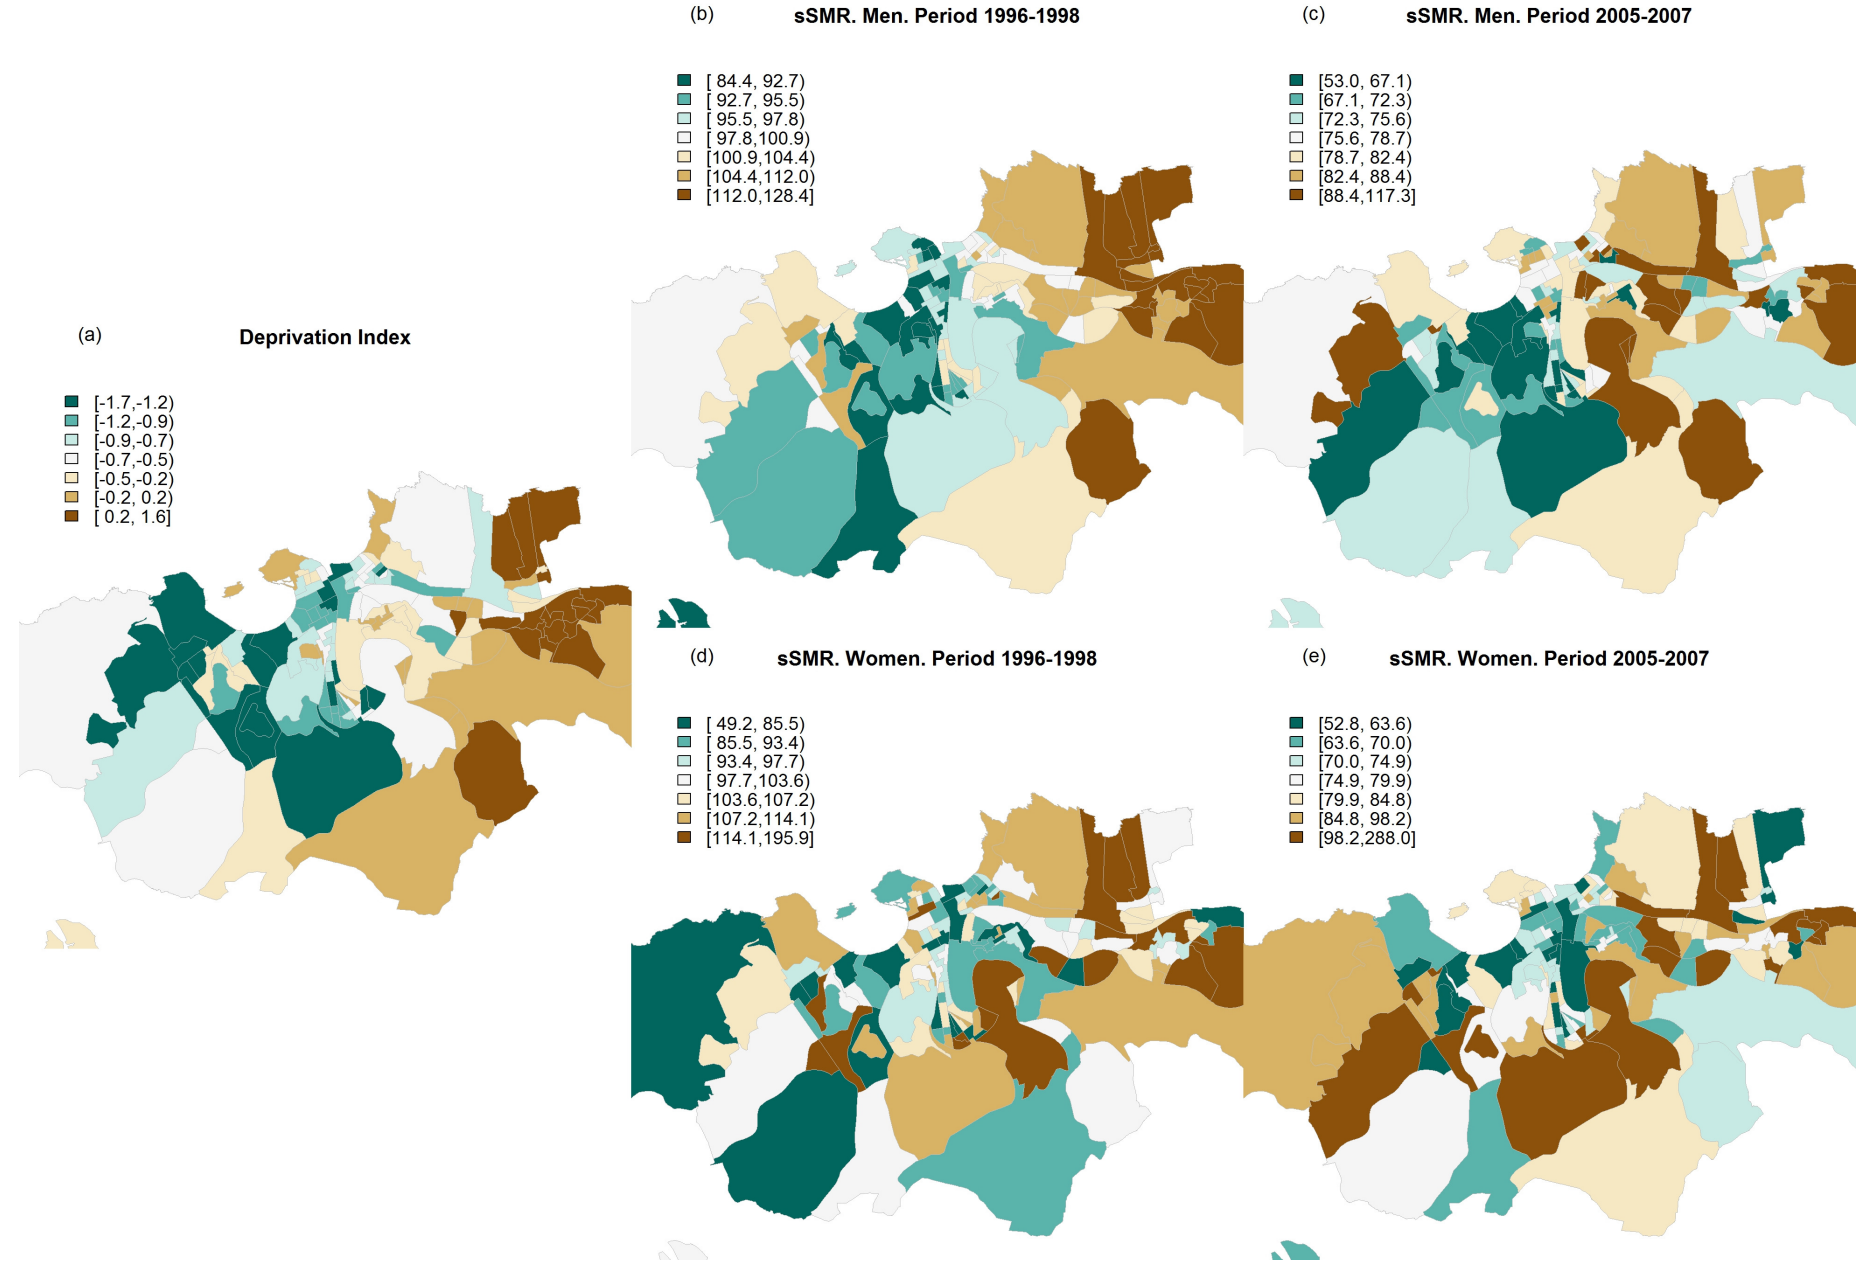

**Figure 27.** Distribution of deprivation index (a) and of the smoothed Standardised Mortality Ratios (sSMR) (b-e) for all-cause mortality, by period (1996-1998 and 2005-2007) and by sex in the city of Santa Cruz. Green areas represent less socioeconomic deprivation and lower sSMR values. Brown areas represent greater socioeconomic deprivation and higher sSMR values.

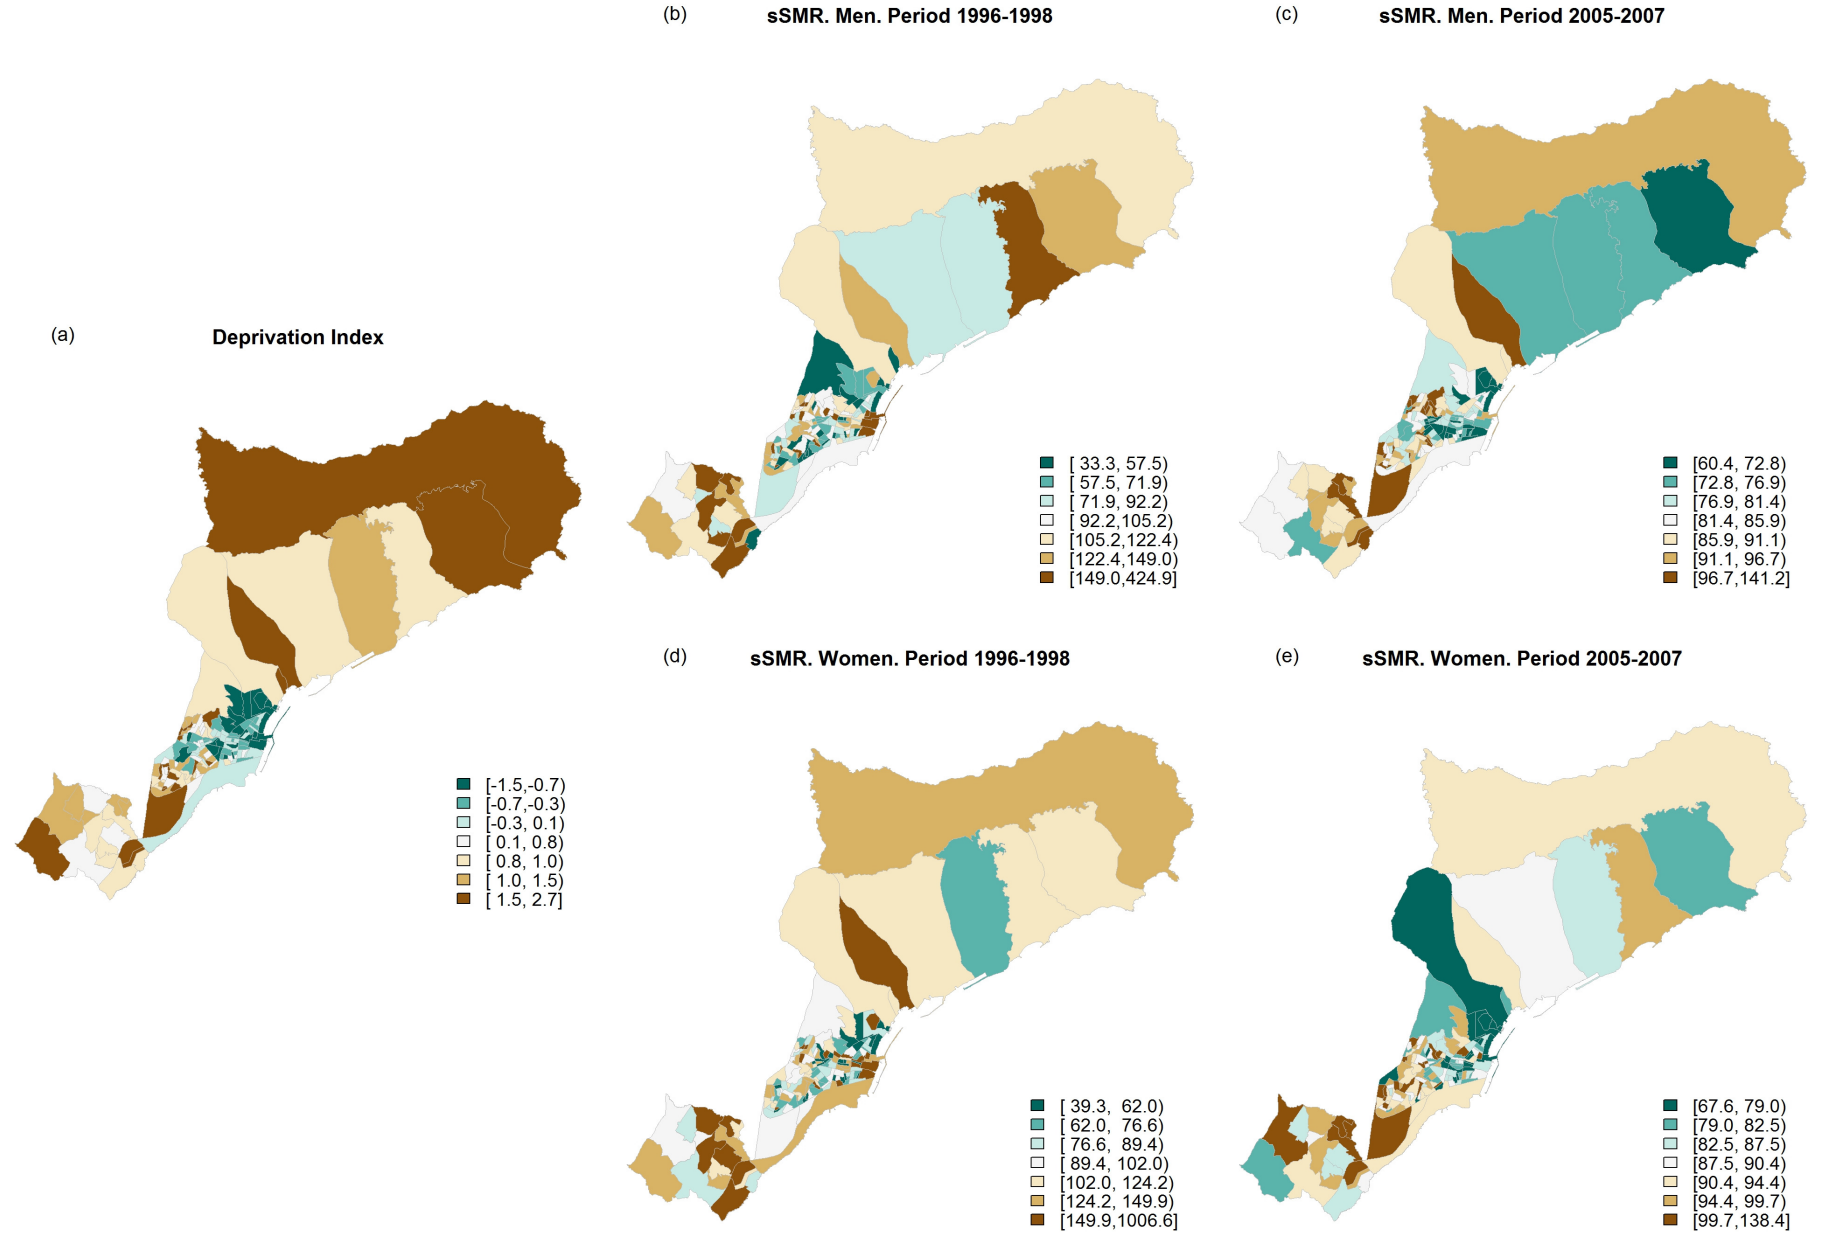

**Figure 28.** Distribution of deprivation index (a) and of the smoothed Standardised Mortality Ratios (sSMR) (b-e) for all-cause mortality, by period (1996-1998 and 2005-2007) and by sex in the city of Santiago. Green areas represent less socioeconomic deprivation and lower sSMR values. Brown areas represent greater socioeconomic deprivation and higher sSMR values.

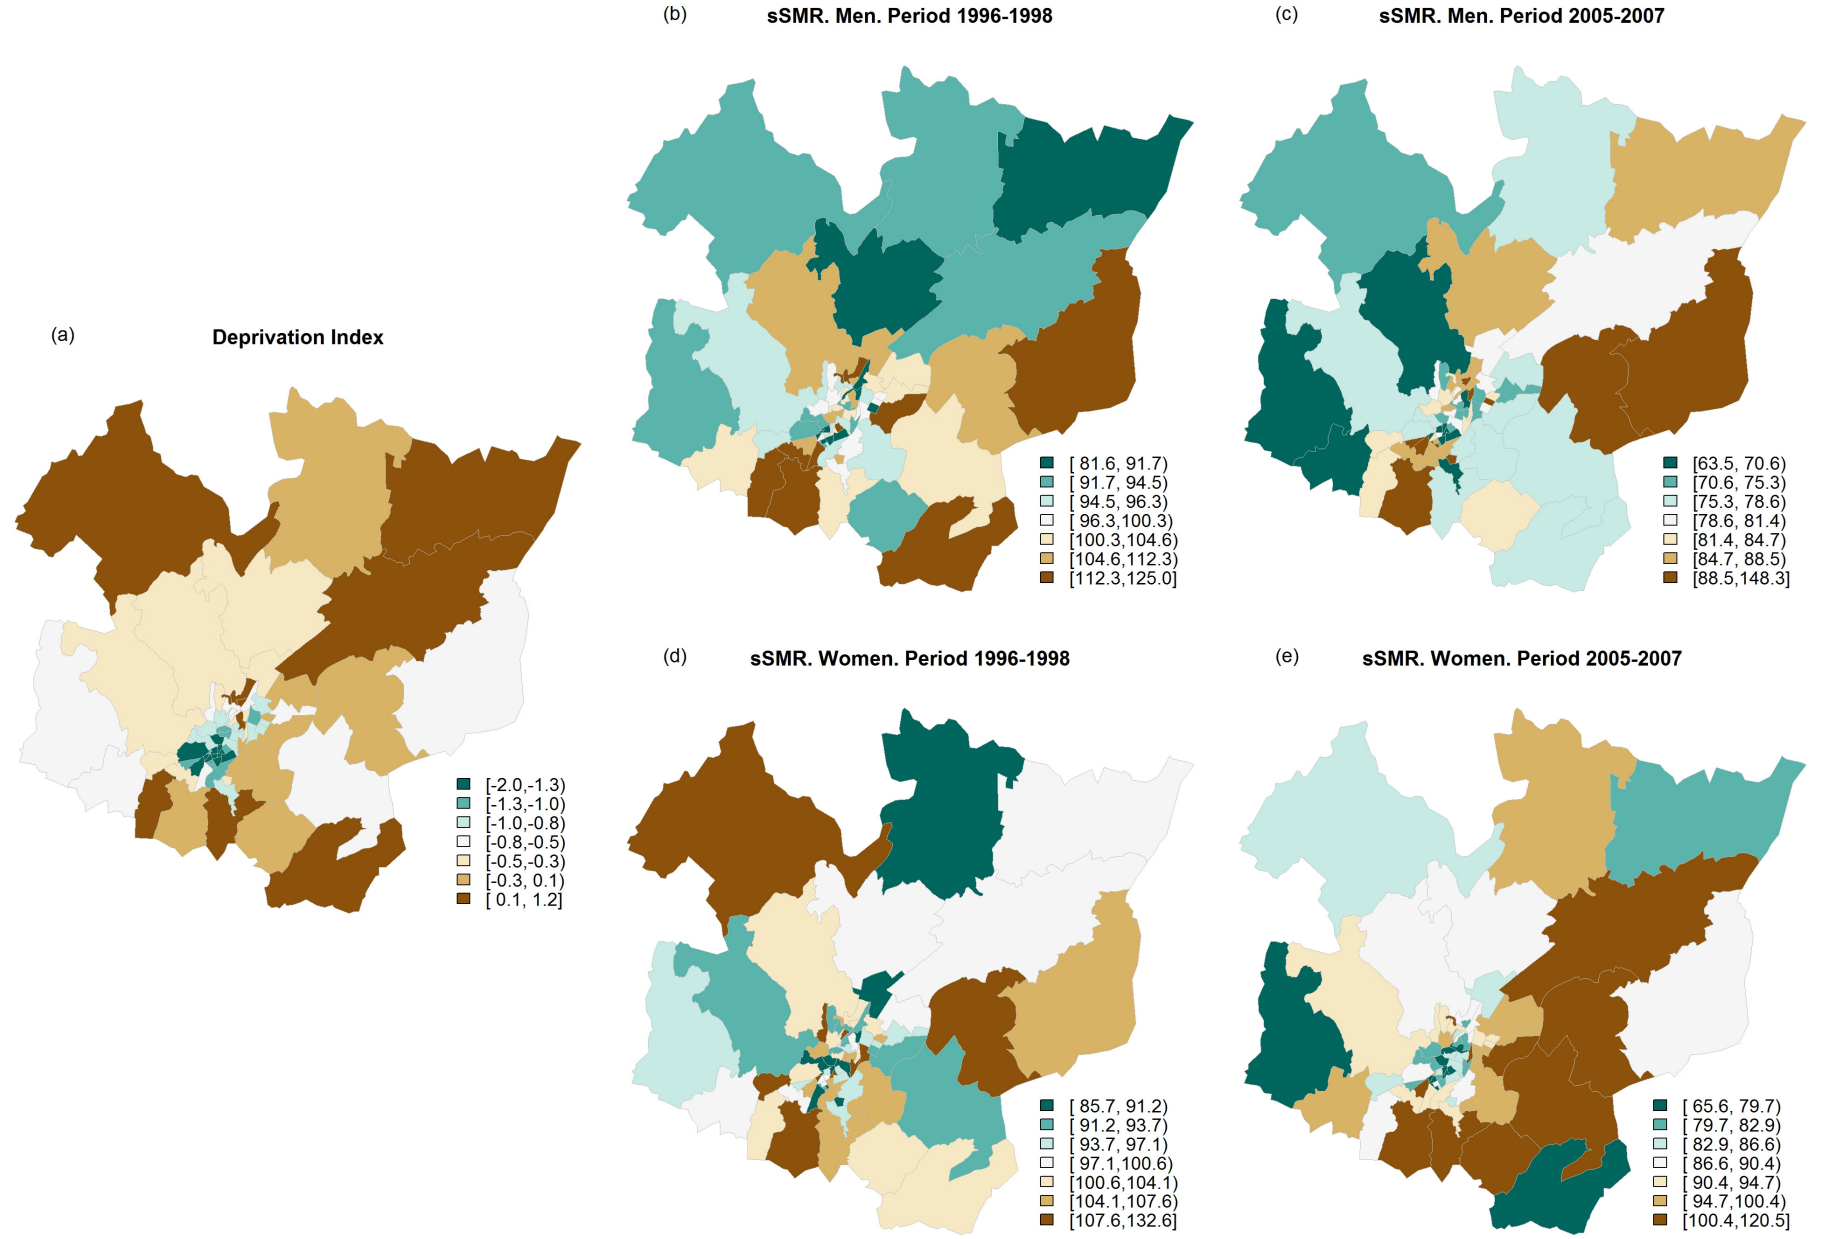

**Figure 29.** Distribution of deprivation index (a) and of the smoothed Standardised Mortality Ratios (sSMR) (b-e) for all-cause mortality, by period (1996-1998 and 2005-2007) and by sex in the city of Sevilla. Green areas represent less socioeconomic deprivation and lower sSMR values. Brown areas represent greater socioeconomic deprivation and higher sSMR values.

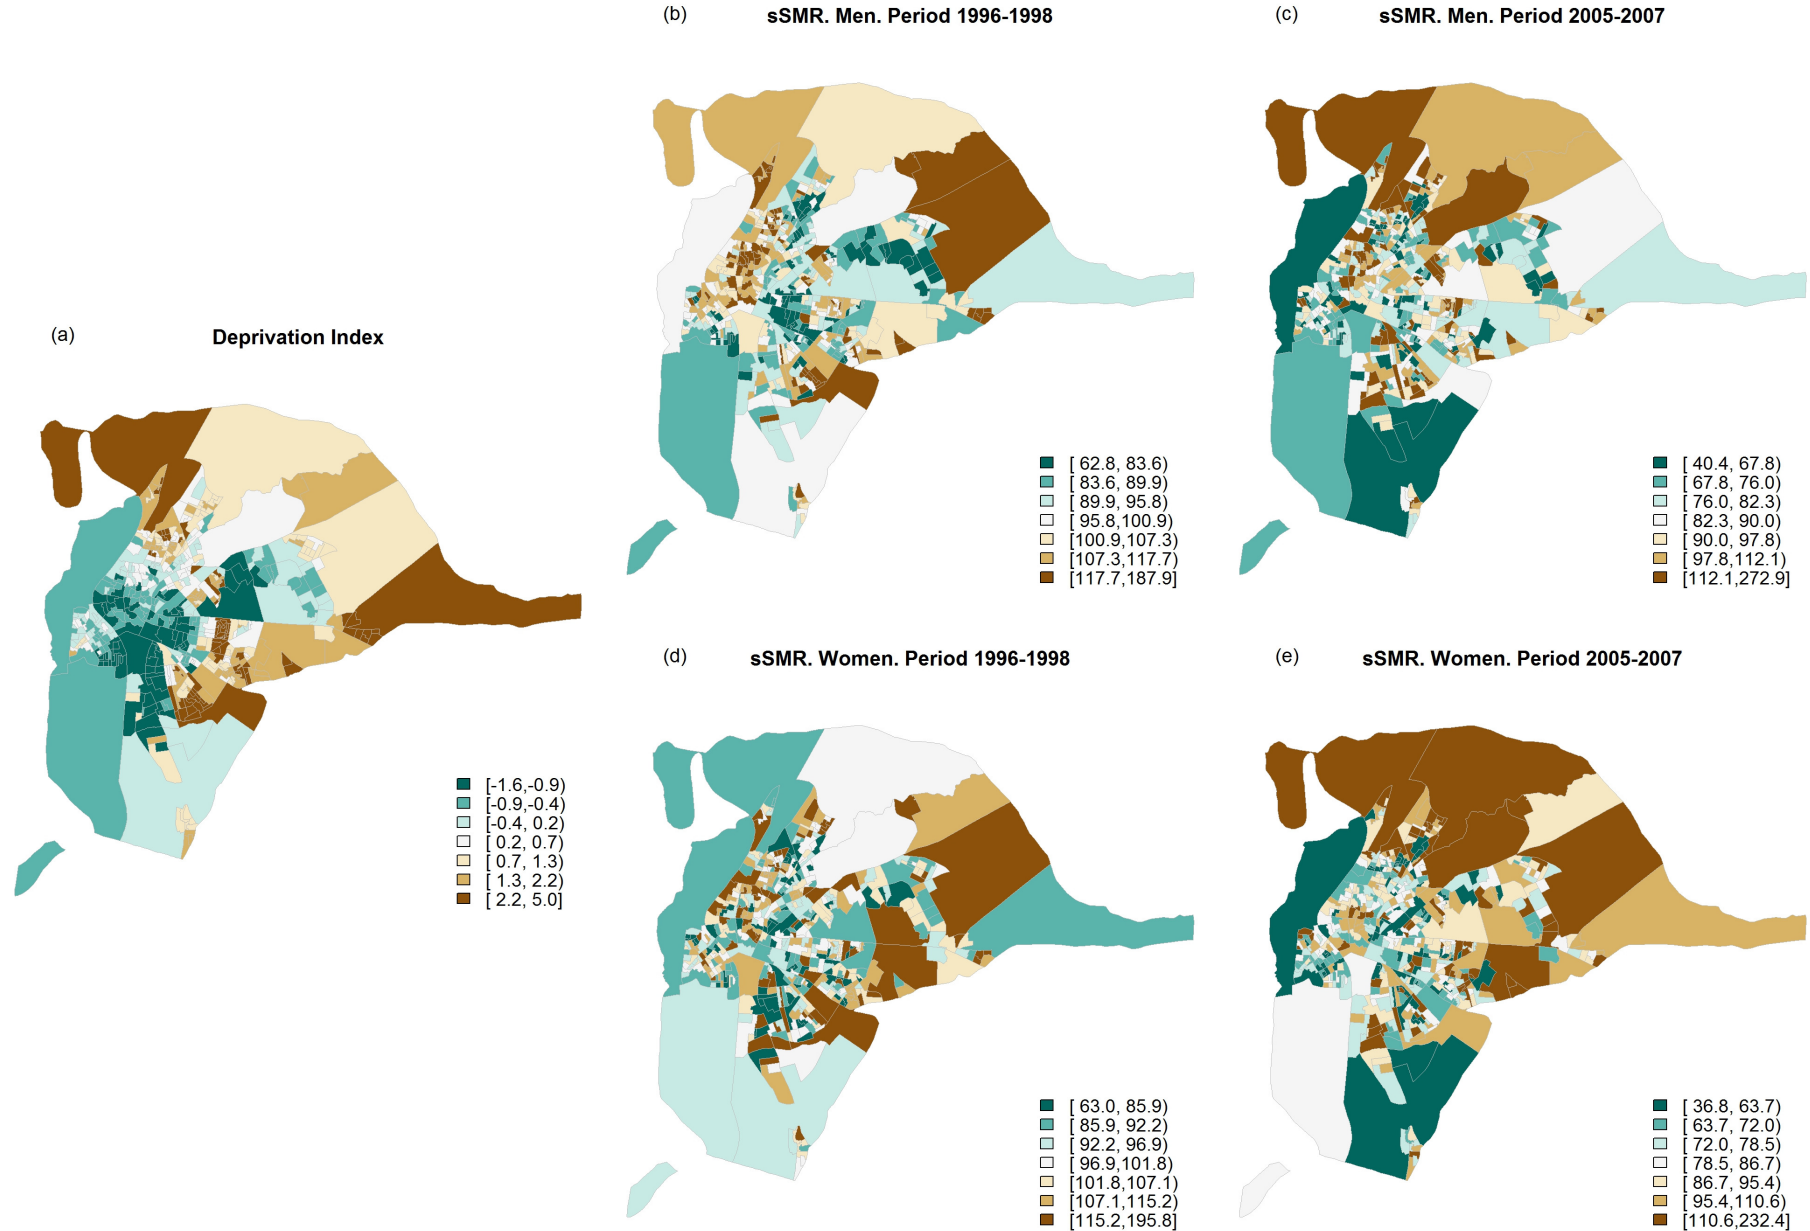



**Figure 30.** Distribution of deprivation index (a) and of the smoothed Standardised Mortality Ratios (sSMR) (b-e) for all-cause mortality, by period (1996-1998 and 2005-2007) and by sex in the city of Valencia. Green areas represent less socioeconomic deprivation and lower sSMR values. Brown areas represent greater socioeconomic deprivation and higher sSMR values.

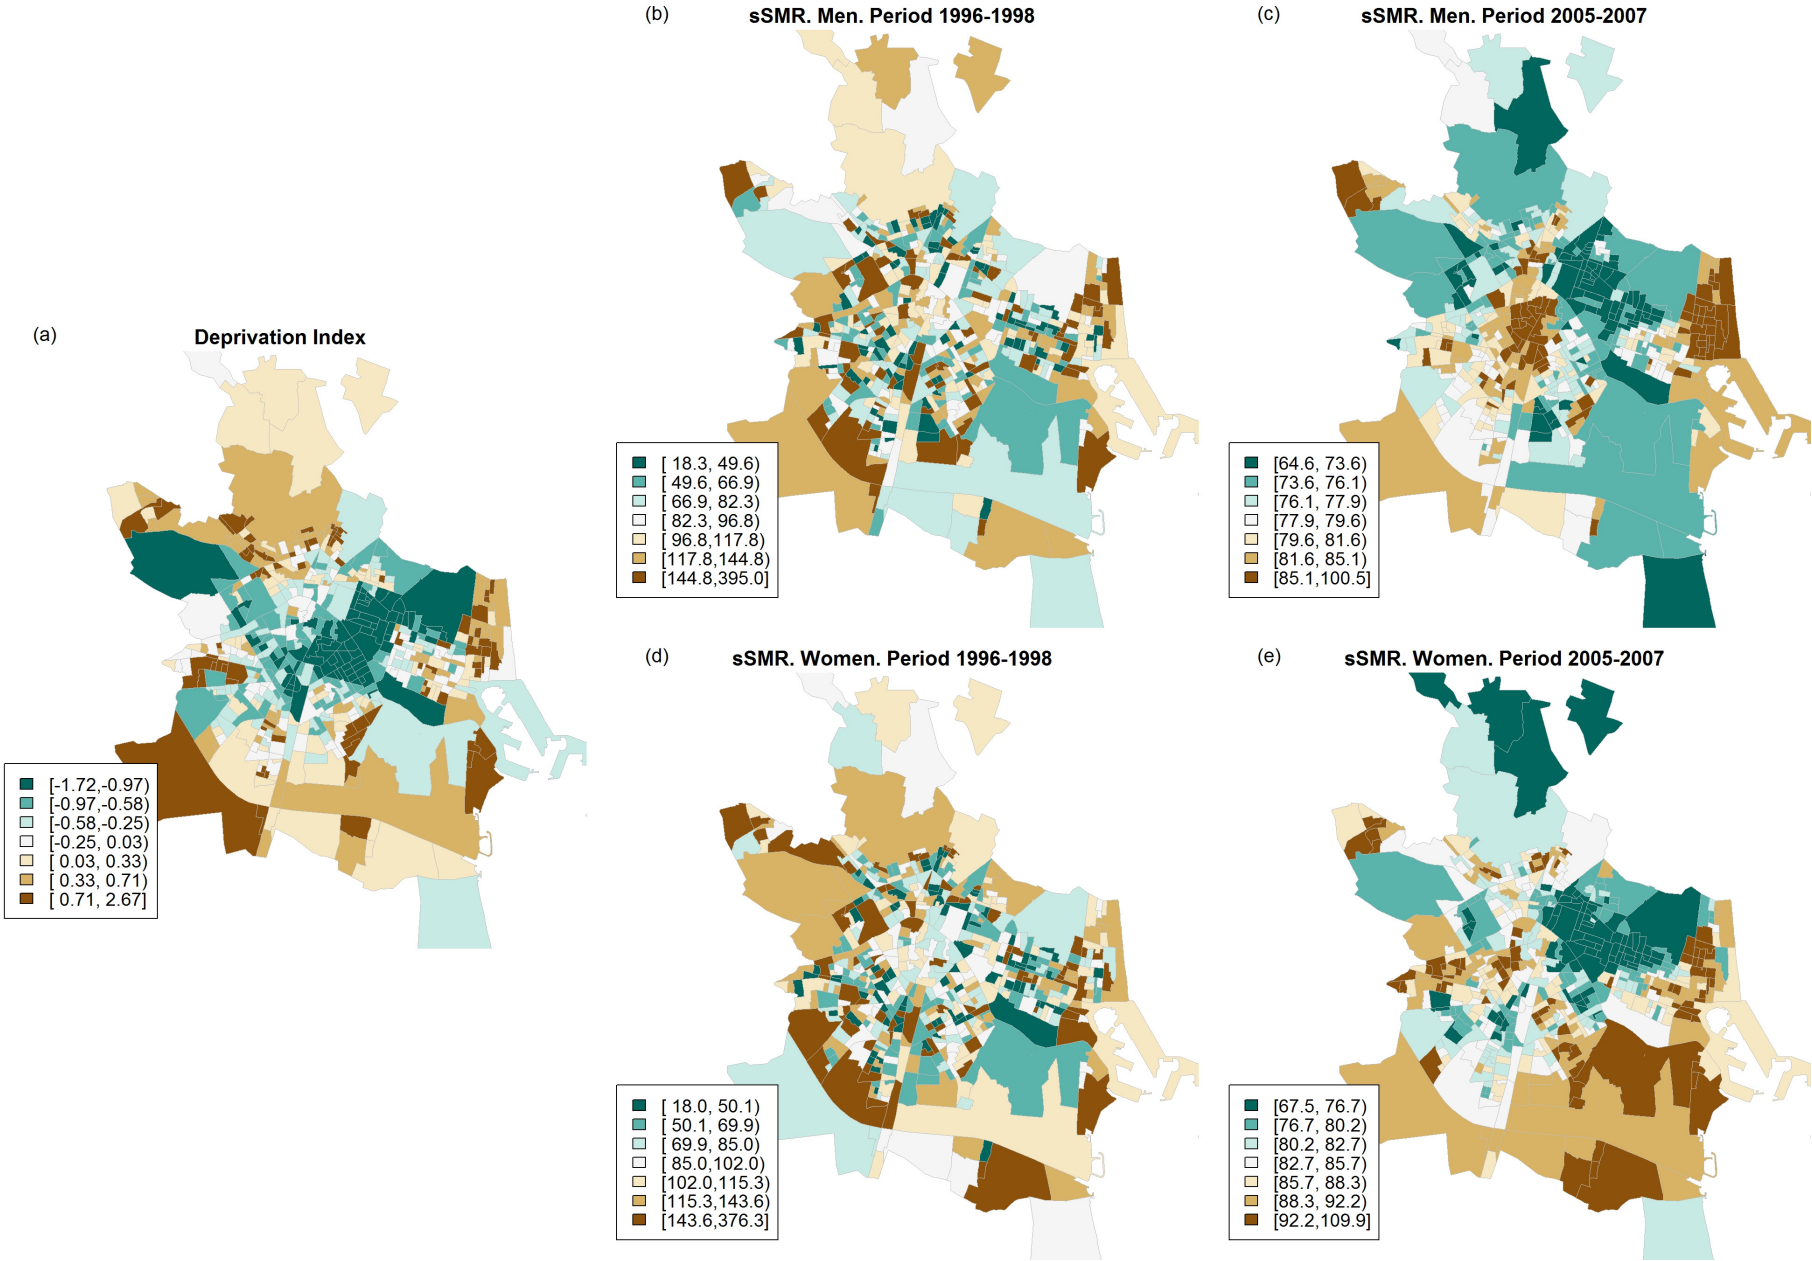

**Figure 31.** Distribution of deprivation index (a) and of the smoothed Standardised Mortality Ratios (sSMR) (b-e) for all-cause mortality, by period (1996-1998 and 2005-2007) and by sex in the city of Vigo. Green areas represent less socioeconomic deprivation and lower sSMR values. Brown areas represent greater socioeconomic deprivation and higher sSMR values.

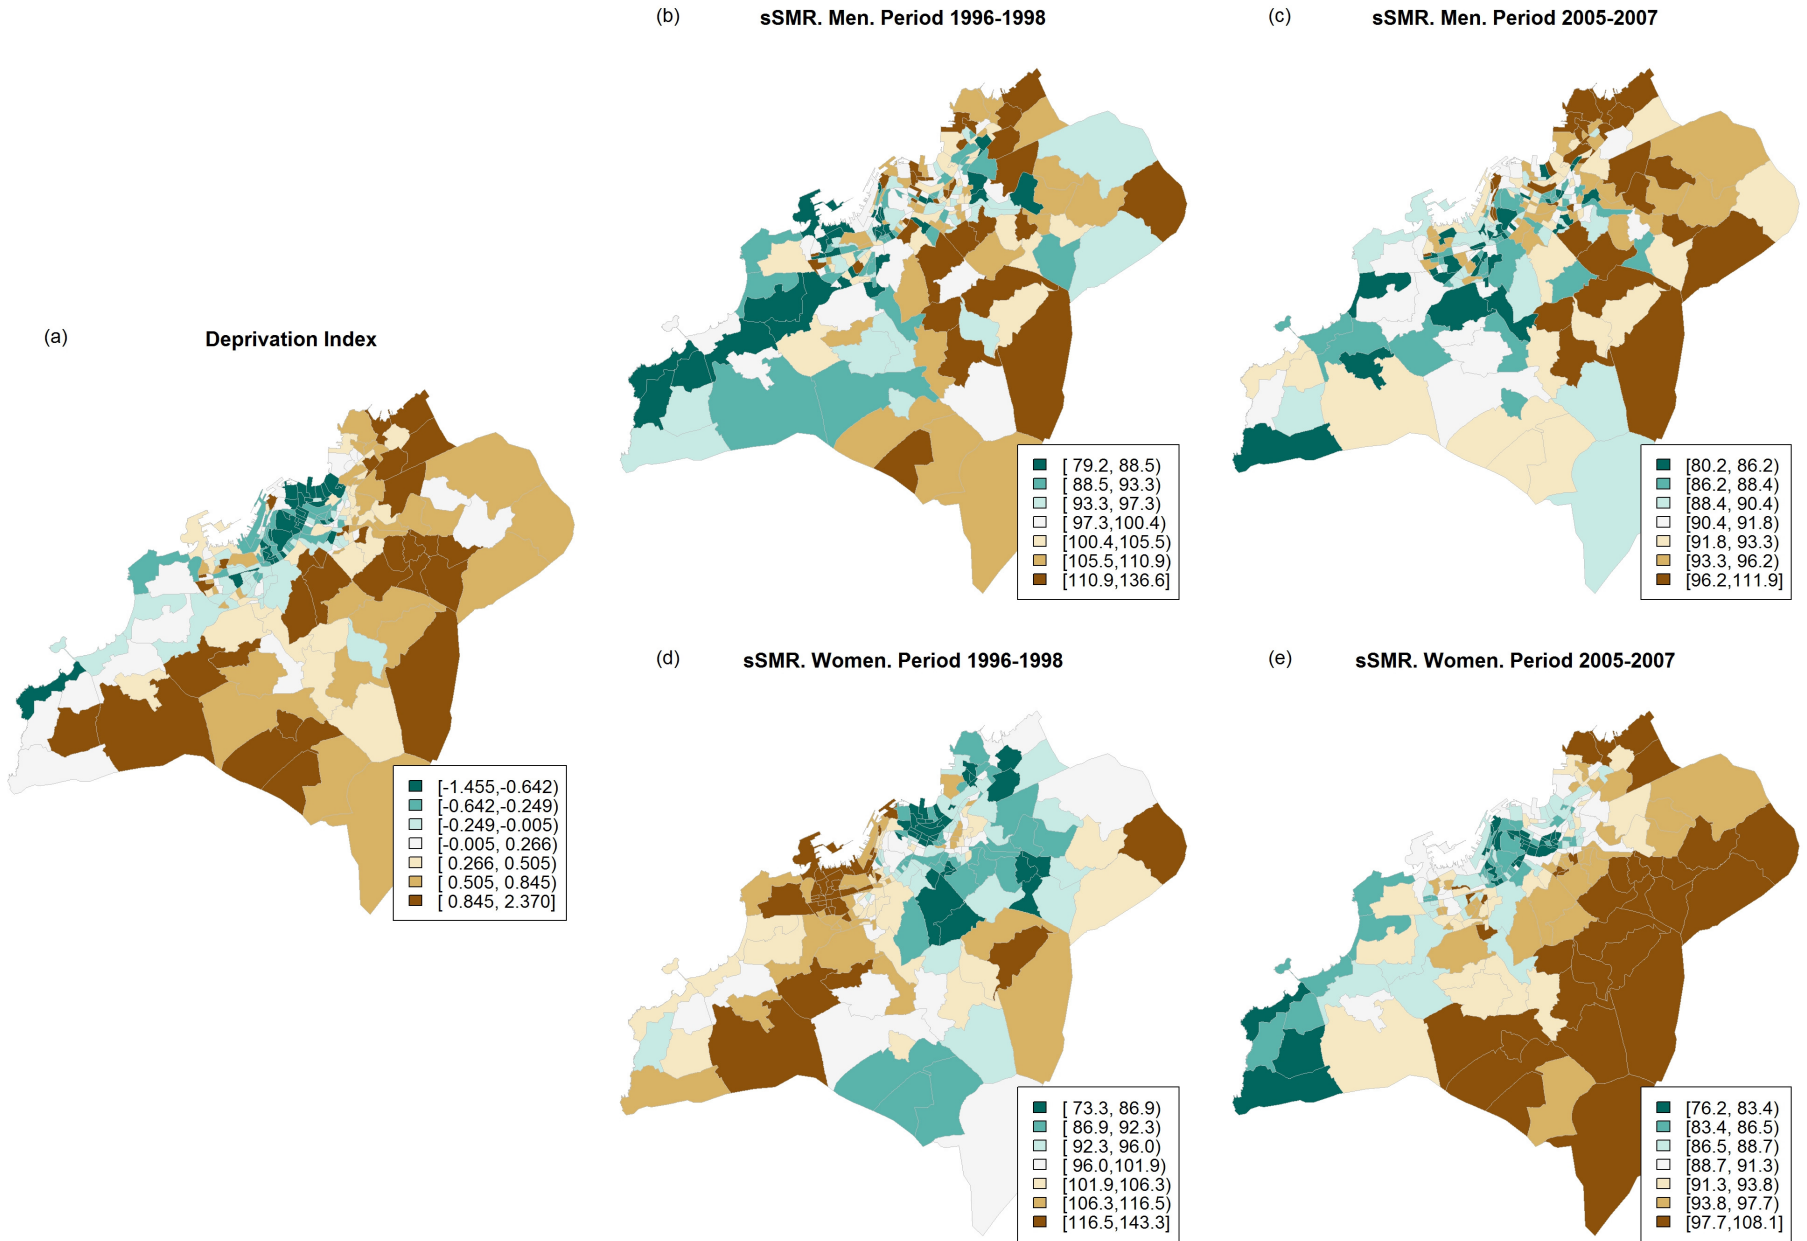

**Figure 32.** Distribution of deprivation index (a) and of the smoothed Standardised Mortality Ratios (sSMR) (b-e) for all-cause mortality, by period (1996-1998 and 2005-2007) and by sex in the city of Vitoria. Green areas represent less socioeconomic deprivation and lower sSMR values. Brown areas represent greater socioeconomic deprivation and higher sSMR values.

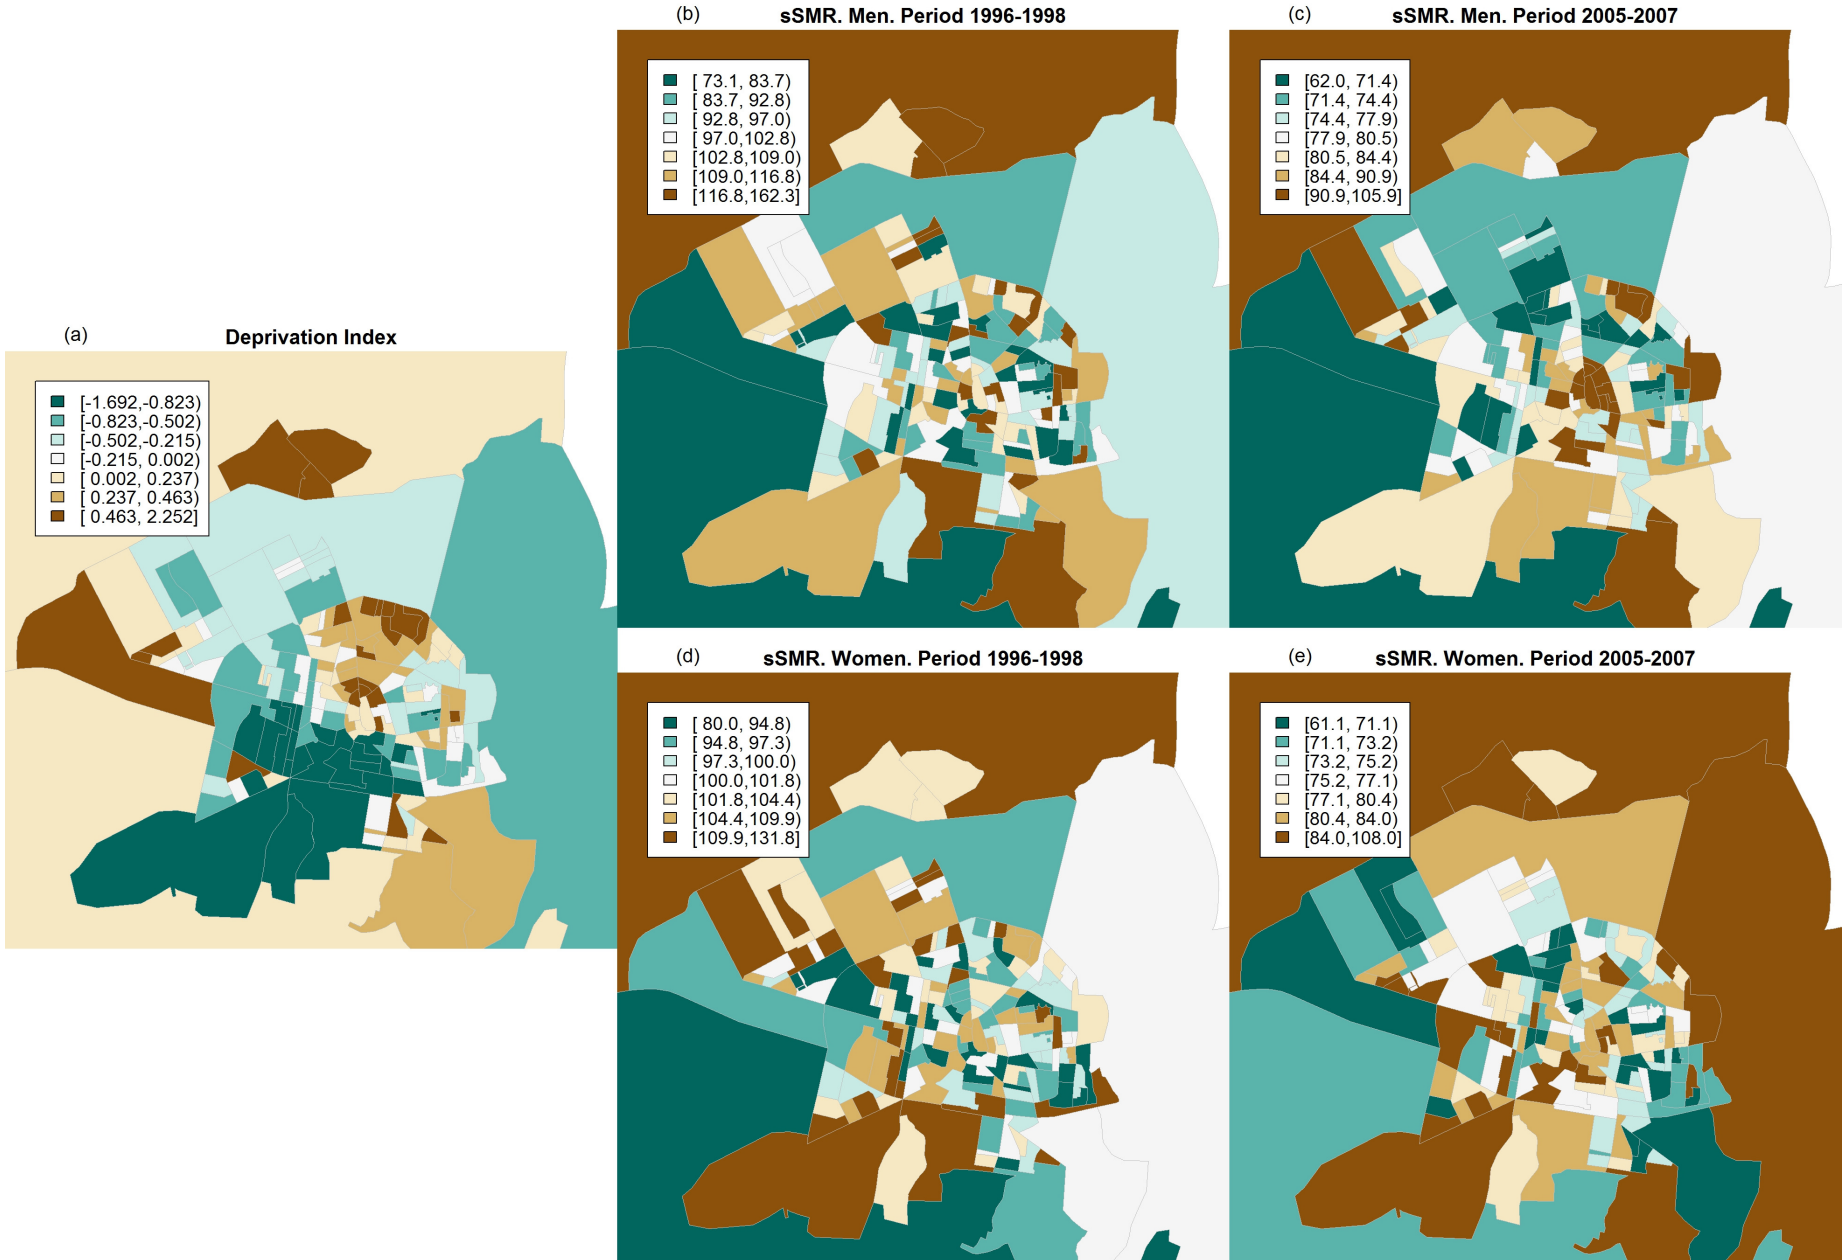

**Figure 33.** Distribution of deprivation index (a) and of the smoothed Standardised Mortality Ratios (sSMR) (b-e) for all-cause mortality, by period (1996-1998 and 2005-2007) and by sex in the city of Zaragoza. Green areas represent less socioeconomic deprivation and lower sSMR values. Brown areas represent greater socioeconomic deprivation and higher sSMR values.

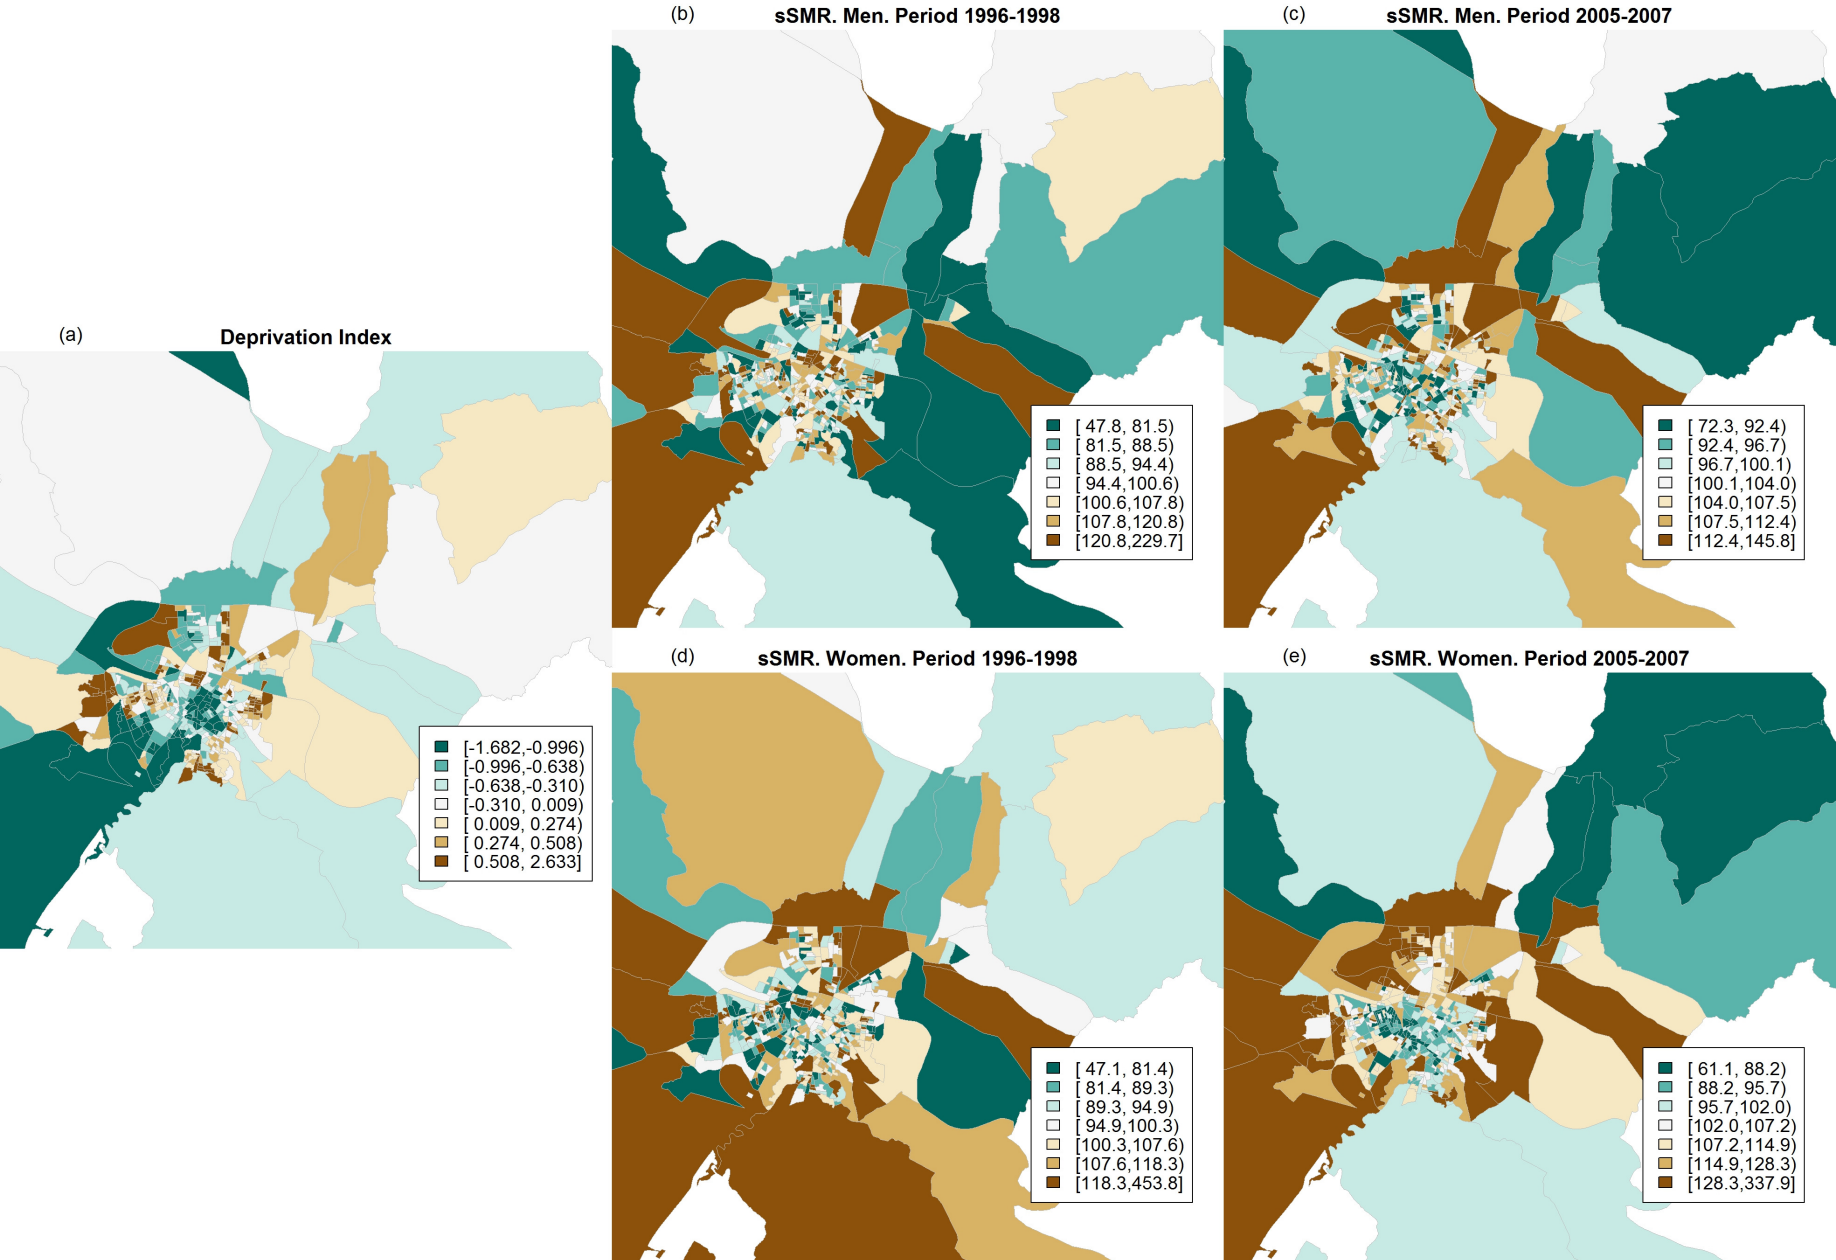

Supplement: MOESM3 [file 10544270]
